# Supplementary material for: Phenotypic profiling of solute carriers characterizes serine transport in cancer
Source: PubMed Central journal article supplement (PMC10730406; doi:10.1038/s42255-023-00936-2), 2023-12-08
Supplement: 42255_2023_936_MOESM1_ESM.pdf [file 42255_2023_936_MOESM1_ESM.pdf]

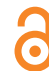

---

# Phenotypic profiling of solute carriers characterizes serine transport in cancer

---

In the format provided by the authors and unedited

| Supplementary Table 1 - Reported SLCs |                                          |                                                                                                                                                       |
|---------------------------------------|------------------------------------------|-------------------------------------------------------------------------------------------------------------------------------------------------------|
| SLC                                   | Reported Serine and/or Glycine Transport | Reference                                                                                                                                             |
| SLC1A4                                | Serine                                   | <a href="https://www.ncbi.nlm.nih.gov/pmc/articles/PMC6156681/">https://www.ncbi.nlm.nih.gov/pmc/articles/PMC6156681/</a>                             |
| SLC1A5                                | Serine                                   | <a href="https://pubmed.ncbi.nlm.nih.gov/27272177/">https://pubmed.ncbi.nlm.nih.gov/27272177/</a>                                                     |
| SLC38A5                               | Serine                                   | <a href="https://pubmed.ncbi.nlm.nih.gov/11698233/">https://pubmed.ncbi.nlm.nih.gov/11698233/</a>                                                     |
| SLC38A7                               | Serine                                   | <a href="https://link.springer.com/content/pdf/10.1007/s00424-013-1393-y.pdf">https://link.springer.com/content/pdf/10.1007/s00424-013-1393-y.pdf</a> |
| SLC6A9                                | Glycine                                  | <a href="https://pubmed.ncbi.nlm.nih.gov/27481395/">https://pubmed.ncbi.nlm.nih.gov/27481395/</a>                                                     |
| SLC32A1                               | Glycine                                  | <a href="https://pubmed.ncbi.nlm.nih.gov/19843525/">https://pubmed.ncbi.nlm.nih.gov/19843525/</a>                                                     |
| SLC36A1                               | Glycine                                  | <a href="https://www.ncbi.nlm.nih.gov/pmc/articles/PMC2342508/">https://www.ncbi.nlm.nih.gov/pmc/articles/PMC2342508/</a>                             |
| SLC6A14                               | Serine and Glycine                       | <a href="https://www.ncbi.nlm.nih.gov/pmc/articles/PMC4638383/">https://www.ncbi.nlm.nih.gov/pmc/articles/PMC4638383/</a>                             |
| SLC7A8                                | Serine and Glycine                       | <a href="https://www.ncbi.nlm.nih.gov/pmc/articles/PMC7182634/#CR6">https://www.ncbi.nlm.nih.gov/pmc/articles/PMC7182634/#CR6</a>                     |
| SLC38A1                               | Serine and Glycine                       | <a href="https://link.springer.com/content/pdf/10.1007/s00424-013-1393-y.pdf">https://link.springer.com/content/pdf/10.1007/s00424-013-1393-y.pdf</a> |
| SLC38A2                               | Serine and Glycine                       | <a href="https://link.springer.com/content/pdf/10.1007/s00424-013-1393-y.pdf">https://link.springer.com/content/pdf/10.1007/s00424-013-1393-y.pdf</a> |

| Supplementary Table 2 - Oligos |                                     |            |                       |                              |              |             |
|--------------------------------|-------------------------------------|------------|-----------------------|------------------------------|--------------|-------------|
| ID                             | Target                              | Species    | Sequence              | Supplier                     | Catalogue No | Application |
| NTC1                           | ON-TARGETplus Non-targeting Control | H. sapiens | UGGUUUACAUGUCGACUAA   | Dharmacon; Horizon Discovery | D-001810-01  | RNAi        |
| NTC2                           | ON-TARGETplus Non-targeting Control | H. sapiens | UGGUUUACAUGUUUGUGUGA  | Dharmacon; Horizon Discovery | D-001810-02  | RNAi        |
| NTC3                           | ON-TARGETplus Non-targeting Control | H. sapiens | UGGUUUACAUGUUUUUCUGA  | Dharmacon; Horizon Discovery | D-001810-03  | RNAi        |
| NTC4                           | ON-TARGETplus Non-targeting Control | H. sapiens | UGGUUUACAUGUUUUUCUUA  | Dharmacon; Horizon Discovery | D-001810-04  | RNAi        |
| SLC1A5_si01                    | SLC1A5                              | H. sapiens | GCCUUUCGCUCAUACUCUA   | Dharmacon; Horizon Discovery | J-007429-05  | RNAi        |
| SLC1A5_si02                    | SLC1A5                              | H. sapiens | GGUCGACCAUAUCUCCUUG   | Dharmacon; Horizon Discovery | J-007429-06  | RNAi        |
| SLC1A5_si03                    | SLC1A5                              | H. sapiens | GCAAGGAGGUGUCGUAUUC   | Dharmacon; Horizon Discovery | J-007429-07  | RNAi        |
| SLC1A5_si04                    | SLC1A5                              | H. sapiens | UGAUACAAGUGAAGAGUGA   | Dharmacon; Horizon Discovery | J-007429-08  | RNAi        |
| SLC38A5_si01                   | SLC38A5                             | H. sapiens | CGGGAUAUCUUUGGAGUUA   | Dharmacon; Horizon Discovery | J-007562-17  | RNAi        |
| SLC38A5_si02                   | SLC38A5                             | H. sapiens | UCAUGGAUUUCGAGGGGAA   | Dharmacon; Horizon Discovery | J-007562-18  | RNAi        |
| SLC38A5_si03                   | SLC38A5                             | H. sapiens | AUAAAGAUUGUUGAGCUACC  | Dharmacon; Horizon Discovery | J-007562-19  | RNAi        |
| SLC38A5_si04                   | SLC38A5                             | H. sapiens | GCAGUGUGAAGGCGGAGAU   | Dharmacon; Horizon Discovery | J-007562-20  | RNAi        |
| SLC1A4_si01                    | SLC1A4                              | H. sapiens | GUACGUUAUGCAACCGAUUA  | Dharmacon; Horizon Discovery | J-007428-09  | RNAi        |
| SLC1A4_si02                    | SLC1A4                              | H. sapiens | UCACAAGCCAAUAAAGCGU   | Dharmacon; Horizon Discovery | J-007428-10  | RNAi        |
| SLC1A4_si03                    | SLC1A4                              | H. sapiens | GGAAAUJACAUUCUGCAU    | Dharmacon; Horizon Discovery | J-007428-11  | RNAi        |
| SLC1A4_si04                    | SLC1A4                              | H. sapiens | AGAAUAGAAUACCGUGUUU   | Dharmacon; Horizon Discovery | J-007428-12  | RNAi        |
| SLC38A7_si01                   | SLC38A7                             | H. sapiens | CCAUCUUCAUCGUCGUCAA   | Dharmacon; Horizon Discovery | J-007328-18  | RNAi        |
| SLC38A7_si02                   | SLC38A7                             | H. sapiens | CAUUCUUAGUCCACGAUCA   | Dharmacon; Horizon Discovery | J-007328-19  | RNAi        |
| SLC38A7_si03                   | SLC38A7                             | H. sapiens | GGUGUGAAGAGUGCGGUAG   | Dharmacon; Horizon Discovery | J-007328-20  | RNAi        |
| SLC38A7_si04                   | SLC38A7                             | H. sapiens | CUUGGUACACAGACGCGAA   | Dharmacon; Horizon Discovery | J-007328-21  | RNAi        |
| SLC6A9_si01                    | SLC6A9                              | H. sapiens | GGGCAACCAGAUUCGAGUUU  | Dharmacon; Horizon Discovery | J-007609-09  | RNAi        |
| SLC6A9_si02                    | SLC6A9                              | H. sapiens | CUCCAGGACUCCCGGAUUA   | Dharmacon; Horizon Discovery | J-007609-10  | RNAi        |
| SLC6A9_si03                    | SLC6A9                              | H. sapiens | UCAUGUACAUUCAGGGCA    | Dharmacon; Horizon Discovery | J-007609-11  | RNAi        |
| SLC6A9_si04                    | SLC6A9                              | H. sapiens | GGAGUGGGCUAUGGUUAUGA  | Dharmacon; Horizon Discovery | J-007609-12  | RNAi        |
| SLC36A1_si01                   | SLC36A1                             | H. sapiens | CGAGUGAGAGGGGUUAUA    | Dharmacon; Horizon Discovery | J-007550-09  | RNAi        |
| SLC36A1_si02                   | SLC36A1                             | H. sapiens | GGAUUGAAGACUACCACGA   | Dharmacon; Horizon Discovery | J-007550-10  | RNAi        |
| SLC36A1_si03                   | SLC36A1                             | H. sapiens | CUUCUUUGGCACAGCGAUU   | Dharmacon; Horizon Discovery | J-007550-11  | RNAi        |
| SLC36A1_si04                   | SLC36A1                             | H. sapiens | GCUUCUGUUGUUUCGCCAAA  | Dharmacon; Horizon Discovery | J-007550-12  | RNAi        |
| SLC6A14_si01                   | SLC6A14                             | H. sapiens | GGUGUGGCAAGGUGGUUAUA  | Dharmacon; Horizon Discovery | J-007601-09  | RNAi        |
| SLC6A14_si02                   | SLC6A14                             | H. sapiens | ACGAGUGGGGAUJAGGAAA   | Dharmacon; Horizon Discovery | J-007601-10  | RNAi        |
| SLC6A14_si03                   | SLC6A14                             | H. sapiens | GUUUCAGGUGUGGGAAUU    | Dharmacon; Horizon Discovery | J-007601-11  | RNAi        |
| SLC6A14_si04                   | SLC6A14                             | H. sapiens | GUUUGGCAAGGUGGUUAUA   | Dharmacon; Horizon Discovery | J-007601-12  | RNAi        |
| SLC38A2_si01                   | SLC38A2                             | H. sapiens | CUGAAAGACCCGAGCGUA    | Dharmacon; Horizon Discovery | J-007559-09  | RNAi        |
| SLC38A2_si02                   | SLC38A2                             | H. sapiens | GCACAUUUUAUCGUACGUCA  | Dharmacon; Horizon Discovery | J-007559-10  | RNAi        |
| SLC38A2_si03                   | SLC38A2                             | H. sapiens | CAAUUGGGAUUAAGGCAU    | Dharmacon; Horizon Discovery | J-007559-11  | RNAi        |
| SLC38A2_si04                   | SLC38A2                             | H. sapiens | GGGAUACCAAGAUUGUUU    | Dharmacon; Horizon Discovery | J-007559-12  | RNAi        |
| SLC38A1_si01                   | SLC38A1                             | H. sapiens | CAAAAGUGGACUCGAAUUA   | Dharmacon; Horizon Discovery | J-007558-10  | RNAi        |
| SLC38A1_si02                   | SLC38A1                             | H. sapiens | CCACAGGGAAGUUCGUAAU   | Dharmacon; Horizon Discovery | J-007558-11  | RNAi        |
| SLC38A1_si03                   | SLC38A1                             | H. sapiens | GAGAAUCAUGUGUACCUAA   | Dharmacon; Horizon Discovery | J-007558-12  | RNAi        |
| SLC38A1_si04                   | SLC38A1                             | H. sapiens | GAUAGUUACUUUGGCAUA    | Dharmacon; Horizon Discovery | J-007558-13  | RNAi        |
| SLC25A28_si01                  | SLC25A28                            | H. sapiens | GUGUAUGAGUUUCUCAAU    | Dharmacon; Horizon Discovery | J-007368-17  | RNAi        |
| SLC25A28_si02                  | SLC25A28                            | H. sapiens | GUGUAUGAGCACUGAACGA   | Dharmacon; Horizon Discovery | J-007368-18  | RNAi        |
| SLC25A28_si03                  | SLC25A28                            | H. sapiens | CCAUGAACCCUUCGCGAAGU  | Dharmacon; Horizon Discovery | J-007368-19  | RNAi        |
| SLC25A28_si04                  | SLC25A28                            | H. sapiens | CUUCAGGACGGUUAUCAA    | Dharmacon; Horizon Discovery | J-007368-20  | RNAi        |
| SLC25A15_si01                  | SLC25A15                            | H. sapiens | GCCUCUUGGCUUGCGGUUAUA | Dharmacon; Horizon Discovery | J-007474-06  | RNAi        |
| SLC25A15_si02                  | SLC25A15                            | H. sapiens | GCACUAAUCGCCAACAUUCG  | Dharmacon; Horizon Discovery | J-007474-07  | RNAi        |
| SLC25A15_si03                  | SLC25A15                            | H. sapiens | GAAUUAGGCCUUGUACCUU   | Dharmacon; Horizon Discovery | J-007474-08  | RNAi        |
| SLC25A15_si04                  | SLC25A15                            | H. sapiens | CAGGACAGGAUUAUCAGAA   | Dharmacon; Horizon Discovery | J-007474-09  | RNAi        |
| SLC7A8_si01                    | SLC7A8                              | H. sapiens | CCACGAAGGACAAGGACGU   | Dharmacon; Horizon Discovery | J-007618-09  | RNAi        |
| SLC7A8_si02                    | SLC7A8                              | H. sapiens | UGGCAUGAUUCCACGUGAA   | Dharmacon; Horizon Discovery | J-007618-10  | RNAi        |
| SLC7A8_si03                    | SLC7A8                              | H. sapiens | AGAUGUGUGUGGUGUGUA    | Dharmacon; Horizon Discovery | J-007618-11  | RNAi        |
| SLC7A8_si04                    | SLC7A8                              | H. sapiens | CCCAAGUGUUUCAGUGACU   | Dharmacon; Horizon Discovery | J-007618-12  | RNAi        |
| SLC12A4_si01                   | SLC12A4                             | H. sapiens | GGGAACAACAUUCGACGA    | Dharmacon; Horizon Discovery | J-007385-09  | RNAi        |
| SLC12A4_si02                   | SLC12A4                             | H. sapiens | ACAGUGAGGGGACGAGAA    | Dharmacon; Horizon Discovery | J-007385-10  | RNAi        |
| SLC12A4_si03                   | SLC12A4                             | H. sapiens | UGGAUGACUCGGACGGACA   | Dharmacon; Horizon Discovery | J-007385-11  | RNAi        |
| SLC12A4_si04                   | SLC12A4                             | H. sapiens | CCACCAAGCUGAGCCGAU    | Dharmacon; Horizon Discovery | J-007385-12  | RNAi        |
| SLC25A1_si01                   | SLC25A1                             | H. sapiens | GCGCACAAUACCGGAUA     | Dharmacon; Horizon Discovery | J-007468-07  | RNAi        |
| SLC25A1_si02                   | SLC25A1                             | H. sapiens | GGAAAGCGGACUUAAGCCUA  | Dharmacon; Horizon Discovery | J-007468-08  | RNAi        |
| SLC25A1_si03                   | SLC25A1                             | H. sapiens | GCCAUCCGUUCUUCGUCA    | Dharmacon; Horizon Discovery | J-007468-09  | RNAi        |
| SLC25A1_si04                   | SLC25A1                             | H. sapiens | GGUUUGGAAUUGUUCGAGUU  | Dharmacon; Horizon Discovery | J-007468-10  | RNAi        |
| PHGDH_CRISPR-1                 | PHGDH                               | H. sapiens | TGCAAGATCTTCCGGCAGCA  | IDT                          | n/a          | CRISPR      |
| PHGDH_CRISPR-2                 | PHGDH                               | H. sapiens | TGCCGGAAGATCTTCAAGA   | IDT                          | n/a          | CRISPR      |
| NTC_gRNA_A                     | NTC                                 | H. sapiens | AAAATAGCAGTAACTCAAC   | IDT                          | n/a          | CRISPR      |
| NTC_gRNA_B                     | NTC                                 | H. sapiens | GAAGAAGAATTGGGGATGATG | IDT                          | n/a          | CRISPR      |
| SLC6A14_CRISPR-1               | SLC6A14                             | H. sapiens | TCAGTAAAGTGGCGCTCAA   | IDT                          | n/a          | CRISPR      |
| SLC12A4_gRNA                   | SLC12A4                             | H. sapiens | AGAGCTGGACATCCGCCAA   | IDT                          | n/a          | CRISPR      |
| SLC25A15_gRNA_1                | SLC25A15                            | H. sapiens | GGCTTCCGTGGCTTCTCAA   | ThermoFisher Scientific      | n/a          | CRISPR      |
| SLC25A15_gRNA_2                | SLC25A15                            | H. sapiens | GGCACTTACGAGCTCCGTG   | ThermoFisher Scientific      | n/a          | CRISPR      |

| Supplementary Table 3 - DNA constructs          |                                         |                                           |                 |
|-------------------------------------------------|-----------------------------------------|-------------------------------------------|-----------------|
| Name                                            | Backbone                                | Source                                    | Ref             |
| pDONR221_SLC12A4                                | pDONR221                                | RESOLUTE Consortium, Giulio Superti-Furga | Addgene; 131932 |
| pDONR221_SLC16A5                                | pDONR221                                | RESOLUTE Consortium, Giulio Superti-Furga | Addgene; 131923 |
| pDONR221_SLC25A15                               | pDONR221                                | RESOLUTE Consortium, Giulio Superti-Furga | Addgene; 131967 |
| pDONR221_SLC24A1                                | pDONR221                                | RESOLUTE Consortium, Giulio Superti-Furga | Addgene; 132049 |
| pDONR221_SLC35C2                                | pDONR221                                | RESOLUTE Consortium, Giulio Superti-Furga | Addgene; 132146 |
| pDONR221_SLC6A14                                | pDONR221                                | RESOLUTE Consortium, Giulio Superti-Furga | Addgene; 131865 |
| pDONR221_SLC38A2                                | pDONR221                                | RESOLUTE Consortium, Giulio Superti-Furga | Addgene; 132059 |
| pDONR221_SLC38A5                                | pDONR221                                | RESOLUTE Consortium, Giulio Superti-Furga | Addgene; 132118 |
| pDONR221_SLC1A5                                 | pDONR221                                | RESOLUTE Consortium, Giulio Superti-Furga | Addgene; 131974 |
| pEGFP-C1                                        | pEGFP-C1                                | Host lab                                  | n/a             |
| pEGFP-N1                                        | pEGFP-N1                                | Host lab                                  | n/a             |
| pcDNA3.1 (+)                                    | pcDNA3.1 (+)                            | Host lab                                  | n/a             |
| pcDNA3.1 (+) FLAG                               | pcDNA3.1 (+)                            | This study                                | n/a             |
| SLC6A14 pEGFPN1                                 | pEGFP-N1                                | This study                                | n/a             |
| SLC6A14; V128E pEGFPN1                          | pEGFP-N1                                | This study                                | n/a             |
| SLC6A14; V128G pEGFPN1                          | pEGFP-N1                                | This study                                | n/a             |
| SLC6A14; V128W pEGFPN1                          | pEGFP-N1                                | This study                                | n/a             |
| SLC6A14_FLAG pcDNA3.1(+)                        | pcDNA3.1 (+)                            | This study                                | n/a             |
| SLC25A15_FLAG pcDNA3.1(+)                       | pcDNA3.1 (+)                            | This study                                | n/a             |
| SLC38A2 pEGFPN1                                 | pEGFP-N1                                | This study                                | n/a             |
| SLC38A2_FLAG pcDNA3.1(+)                        | pcDNA3.1 (+)                            | This study                                | n/a             |
| SLC12A4 pEGFPN1                                 | pEGFP-N1                                | This study                                | n/a             |
| SLC12A4_FLAG pcDNA3.1(+)                        | pcDNA3.1 (+)                            | This study                                | n/a             |
| SLC38A5 pEGFPN1                                 | pEGFP-N1                                | This study                                | n/a             |
| SLC38A5_FLAG pcDNA3.1(+)                        | pcDNA3.1 (+)                            | This study                                | n/a             |
| SLC1A5 pEGFPN1                                  | pEGFP-N1                                | This study                                | n/a             |
| SLC1A5 pcDNA3.1(+)<br>FLAG                      | pcDNA3.1 (+)                            | This study                                | n/a             |
| pSpCas9 (BB) - 2A - Puro - (PX45Q) V2.0         | PX459                                   | Feng Zhang                                | Addgene; 62988  |
| pSpCas9 (BB) - 2A - Puro_NTC                    | pSpCas9 (BB) - 2A - Puro - (PX45Q) V2.0 | This study                                | n/a             |
| Lenti-iCas9-neo                                 | pInducer-20                             | Qin Yan                                   | Addgene; 85400  |
| Lenti-multi-Guide                               | pLentiGuide                             | Qin Yan                                   | Addgene; 85401  |
| pVSV-G                                          | pCMV                                    | Host lab                                  | n/a             |
| psPAX2                                          | psPAX2                                  | Host lab                                  | n/a             |
| Lenti-multi-Guide (LMG)_NTC gRNA1/2             | Lenti-multi-Guide                       | This study                                | n/a             |
| Lenti-multi-Guide (LMG)_SLC6A14/SLC12A4         | Lenti-multi-Guide                       | This study                                | n/a             |
| Lenti-multi-Guide (LMG)_SLC6A14/SLC25A15_gRNA_A | Lenti-multi-Guide                       | This study                                | n/a             |
| Lenti-multi-Guide (LMG)_SLC6A14/SLC25A15_gRNA_B | Lenti-multi-Guide                       | This study                                | n/a             |

| Supplementary Table 4 - qRT-PCR primers |                  |            |                           |          |
|-----------------------------------------|------------------|------------|---------------------------|----------|
| Target                                  | ID               | Species    | Sequence                  | Supplier |
| GAPDH                                   | GAPDH_Fw         | H. sapiens | AGCCACATCGCTCAGACAC       | IDT      |
| GAPDH                                   | GAPDH_Rv         | H. sapiens | GCCCAATACGACCAAATC        | IDT      |
| Actin                                   | Actin_Fw         | H. sapiens | CCAACCGCGAGAAGATGA        | IDT      |
| Actin                                   | Actin_Rv         | H. sapiens | CCAGAGGCGTACAGGGATAG      | IDT      |
| SLC12A4                                 | SLC12A4Fw_B      | H. sapiens | GGCGCGGCGACTATGAC         | IDT      |
| SLC12A4                                 | SLC12A4Rv_B      | H. sapiens | GTGGTTGCCATGTCCGTC        | IDT      |
| SLC1A5                                  | SLC1A5Fw         | H. sapiens | CCTCCGCCCATCAAC           | IDT      |
| SLC1A5                                  | SLC1A5Rv         | H. sapiens | TGGAAGGGAAGATATTTCTCGCA   | IDT      |
| SLC38A5                                 | SLC38A5Fw        | H. sapiens | AACCTGAGTCTGAGTTGCGG      | IDT      |
| SLC38A5                                 | SLC38A5Rv        | H. sapiens | AGGGAGGGCTCCATTCATCT      | IDT      |
| SLC1A4                                  | SLC1A4Fw         | H. sapiens | AGACCCTTCAGTCCAGCGA       | IDT      |
| SLC1A4                                  | SLC1A4Rv         | H. sapiens | TGGAGGGAAACAGGTTTCTGG     | IDT      |
| SLC38A7                                 | SLC38A7Fw        | H. sapiens | GAAAGAATCCCCAAGTCCA       | IDT      |
| SLC38A7                                 | SLC38A7Rv        | H. sapiens | TGAGCAACACCCACCTGTTT      | IDT      |
| SLC6A9                                  | SLC6A9Fw         | H. sapiens | CTCTTCCCAGAACAGAATGGT     | IDT      |
| SLC6A9                                  | SLC6A9Rv         | H. sapiens | CCCACGCTCGTCAGTACAA       | IDT      |
| SLC6A14                                 | SLC6A14_Fw       | H. sapiens | ATCGTCTGGCAAGGTGGTAT      | IDT      |
| SLC6A14                                 | SLC6A14_Rv       | H. sapiens | AATGCCTTTTGAAGCACCT       | IDT      |
| SLC38A2                                 | SLC38A2Fw        | H. sapiens | AGCTGCTCTGAAAAGCCATTAT    | IDT      |
| SLC38A2                                 | SLC38A2Rv        | H. sapiens | CCAAAGGAAGTAGTACCTGGATG   | IDT      |
| SLC7A8                                  | SLC7A8Fw         | H. sapiens | CCTGTGGTATCATCGTAGGGAA    | IDT      |
| SLC7A8                                  | SLC7A8Rv         | H. sapiens | AAGCCCGTCACAATCCAGAC      | IDT      |
| SLC25A28                                | SLC25A28Fw       | H. sapiens | CATATTGCCAATGGTGCGG       | IDT      |
| SLC25A28                                | SLC25A28Rv       | H. sapiens | CCGGTGGTATGGTGAGTTGT      | IDT      |
| SLC25A15                                | SLC25A15Fw       | H. sapiens | ACTAATCGCCAACATCGCTGA     | IDT      |
| SLC25A15                                | SLC25A15Rv       | H. sapiens | CATTCTGCAGATCACTCAGCTT    | IDT      |
| SLC36A1                                 | SLC36A1Fw        | H. sapiens | CAGGCATCGTGATGGGTCC       | IDT      |
| SLC36A1                                 | SLC36A1Rv        | H. sapiens | TTGGCCGCTTCTATCACCTG      | IDT      |
| SLC38A1                                 | SLC38A1Fw        | H. sapiens | TTGGTGGTGAGGGGAGATTC      | IDT      |
| SLC38A1                                 | SLC38A1Rv        | H. sapiens | GAAGCTTGACACCCCTGTTAG     | IDT      |
| PHGDH                                   | PHGDHFw          | H. sapiens | GCAAATCTGCGGAAAGTGCT      | IDT      |
| PHGDH                                   | PHGDHRv          | H. sapiens | ATAAGGCCTTACAGTCCTGC      | IDT      |
| SLC12A4                                 | Hs_SLC12A4_1_SG  | H. sapiens | QT00003787; LOT 462267267 | Qiagen   |
| SLC25A15                                | Hs_SLC25A15_1_SG | H. sapiens | QT00062867; LOT 457134948 | Qiagen   |
| SLC25A1                                 | Hs_SLC25A1_1_SG  | H. sapiens | QT00204862; LOT 353901508 | Qiagen   |

| Supplementary Table 5 - Antibodies |         |                       |                              |            |              |                         |             |
|------------------------------------|---------|-----------------------|------------------------------|------------|--------------|-------------------------|-------------|
| Antibody/Dye                       | Species | Clone                 | Supplier                     | Ref. No.   | LOT          | Dilution                | Application |
| PHGDH                              | Rabbit  | Polyclonal            | Cell Signaling Technology    | 13428      | 1            | 1;1000                  | WB          |
| PSAT1                              | Rabbit  | Polyclonal            | Biotechne; Novus Biologicals | NBP1-32920 | 42242        | 1;1000                  | WB          |
| PSPH                               | Rabbit  | Polyclonal            | Santa Cruz Biotechnology     | sc-98683   | B1909        | 1;1000                  | WB          |
| SLC25A15                           | Rabbit  | Polyclonal            | Abcam                        | ab228604   | GR3228856-8  | 1;1000                  | WB          |
| UQCRRF51                           | Rabbit  | Polyclonal            | ProteinTech                  | 18443-1-AP | 00025413     | 1;1000                  | WB          |
| GAPDH                              | Mouse   | Monoclonal, clone 6C5 | Merck, Sigma, Millipore      | MAB374     | 2792998      | 1;2000                  | WB          |
| ACTIN                              | Mouse   | Monoclonal, clone C4  | MERCK; Sigma; EMD            | MAB1501    | 3166064      | 1;10000                 | WB          |
| SLC12A4 (KCC1)                     | Rabbit  | Polyclonal            | Thermo Fisher Scientific     | PA5-77471  | XK3733383    | 1;1000                  | WB          |
| SLC6A14                            | Rabbit  | Polyclonal            | Thermo Fisher Scientific     | PA5104151  | XI3736482    | 1;1000                  | WB          |
| Vinculin                           | Mouse   | Monoclonal; 7F9       | Santa Cruz                   | sc-73614   | E1719        | 1;2000                  | WB          |
| IRDye 680RD anti-Rabbit IgG        | Donkey  | Polyclonal            | LI-COR                       | 92568073   | C70323-07    | 1;10000                 | WB          |
| IRDye 800CW anti-Mouse IgG         | Donkey  | Polyclonal            | LI-COR                       | 92532212   | C50422-05    | 1;10000                 | WB          |
| Anti-mouse IgG, HRP-linked         | n/a     | n/a                   | Cell Signaling Technology    | 7076       | 38           | 1;2000                  | WB          |
| Anti-rabbit IgG, HRP-linked        | n/a     | n/a                   | Cell Signaling Technology    | 7074       | 31           | 1;2000                  | WB          |
| GFP                                | Chicken | Polyclonal            | Abcam                        | ab13970    | GR236651-22  | 1;2000                  | IF          |
| DYKDDDDK (FLAG) Tag (9A3)          | Mouse   | Monoclonal            | Cell Signaling Technology    | 8146       | 5            | 1;500                   | IF          |
| SLC6A14                            | Rabbit  | Polyclonal            | St John's Laboratory         | STJ112596  | 259600970101 | 1;500                   | IF          |
| Alexa Fluor 488 anti-rabbit        | Donkey  | Polyclonal            | Invitrogen                   | A21206     | 2289872      | 1;500                   | IF          |
| Alexa Fluor 594 anti-mouse         | Donkey  | Polyclonal            | Invitrogen                   | A21203     | 1918277      | 1;500                   | IF          |
| Alexa Fluor 488 anti-chicken       | Goat    | Polyclonal            | Invitrogen                   | A11039     | 2304258      | 1;500                   | IF          |
| DAPI                               | n/a     | n/a                   | Thermo Fisher Scientific     | 62248      | VG3036772    | 1 $\mu\text{g mL}^{-1}$ | IF          |
| Alexa Fluor 647 Phalloidin         | n/a     | n/a                   | Invitrogen                   | A22287     | 1941485      | 1;100                   | IF          |
