# Supplementary material for: Phenotypic profiling of solute carriers characterizes serine transport in cancer
Source: PubMed Central journal article supplement (PMC10730406; doi:10.1038/s42255-023-00936-2), 2023-12-08

## Extended Data Figure 2a

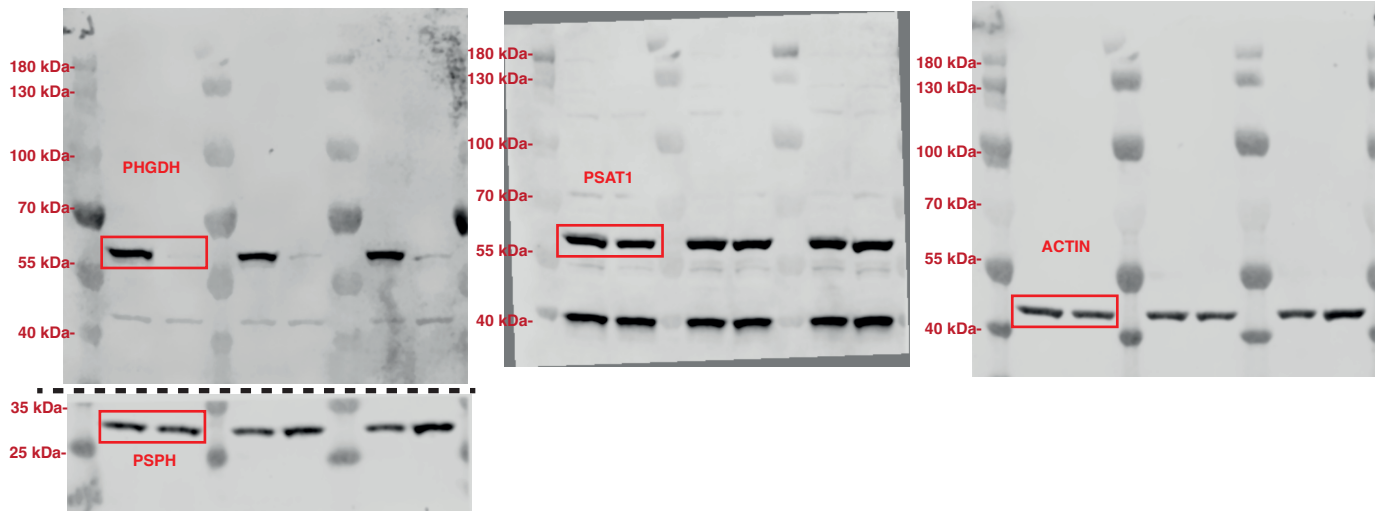

## Extended Data Figure 3i

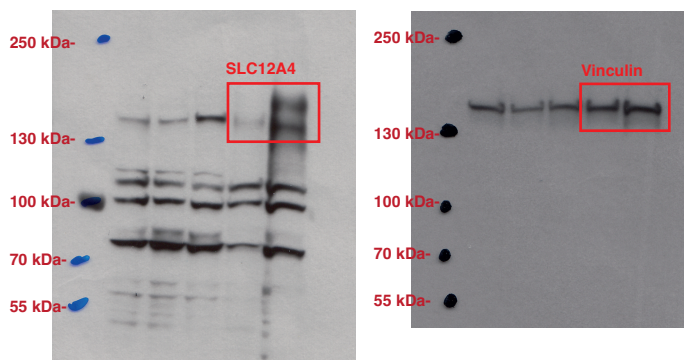

## Extended Data Figure 4c

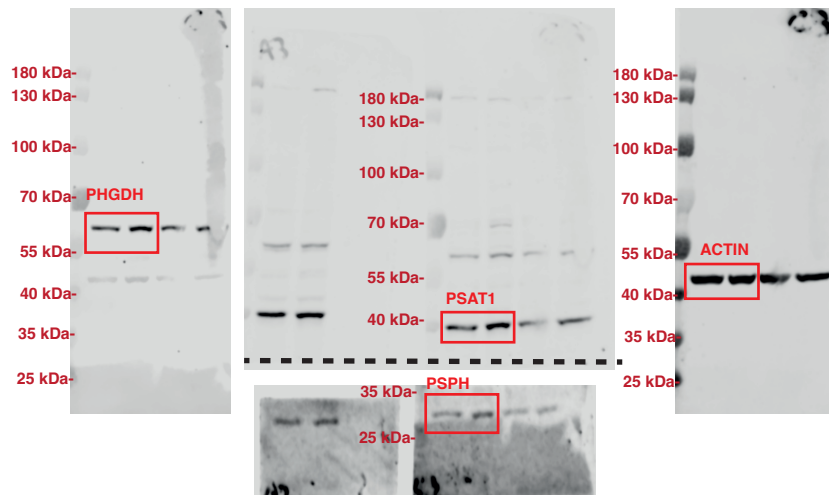

Supplement: 42255_2023_936_MOESM18_ESM.pdf [file 42255_2023_936_MOESM18_ESM.pdf]
