# Supplementary material for: Phenotypic profiling of solute carriers characterizes serine transport in cancer
Source: Nat Metab. 2023 Dec 8;5(12):2148–68. doi: 10.1038/s42255-023-00936-2 (PMC10730406; doi:10.1038/s42255-023-00936-2)
Supplement: Supplementary file 3 — Statistical source data related to Fig. 1. [file 42255_2023_936_MOESM3_ESM.xlsx]

## Sheet: Fig 1 c
	Fig. 1c
	Amino Acids SLCs	SLC38A1	SLC35G2	SLC22A23	SLC16A6	SLC2A2	SLC9B2	SLC30A2	SLC12A4	SLC18A1	SLC35G5	SLC20A1	SLC26A11	SLC12A9	SLC2A1	SLC35D3	SLC25A41	SLC4A1	SLC6A12	SLC24A4	SLC39A11	SLC30A4	SLC9C1	SLC16A14	SLC27A1	SLC52A3	SLC12A8	SLC22A7	SLC25A52	SLC44A1	SLC39A7	SLC11A1	SLC39A9	SLC13A3	SLC7A1	SLC41A1	SLC7A5	SLC30A10	SLC19A2	SLC25A10	SLC51B	SLC6A4	SLC35G6	SLC6A11	SLC24A5	SLC26A10	SLC52A1	SLC7A3	SLC6A19
	Glycine	1.1307	1.35499	1.26552	1.43914	0.775569	1.86783	2.21421	2.16574	0.540338	0.322217	0.587406	0.519789	0.590897	0.539772	0.733621	0.484516	1.36535	1.08385	1.45647	1.24453	1.16718	1.39882	1.36948	1.36018	0.888781	0.842252	0.626299	0.624853	0.726638	0.581314	0.494569	0.58563	1.08911	1.01319	0.883859	1.0739	0.809357	0.852328	0.878911	0.793043	0.92895	0.29069	0.943592	1.0233	0.840719	0.810626	0.861216	0.866367
	L-Alanine	1.18175	1.38219	1.4195	1.61426	0.794126	2.30627	2.51817	2.5938	0.601051	0.304721	0.599169	0.536043	0.641413	0.610596	0.791552	0.593499	1.66253	1.34745	1.6811	1.34698	1.50999	1.68877	1.86975	1.52499	0.880897	0.905587	0.678106	0.721388	0.694514	0.613409	0.469662	0.643951	1.18406	1.09397	0.964659	1.03584	0.937722	0.873552	0.645512	0.994873	1.10205	0.270224	1.30198	1.12352	0.973148	0.890523	0.991965	0.972208
	L-Serine	1.14033	1.54594	1.20754	1.37321	0.742155	2.21295	2.35458	2.61631	0.483345	0.410733	0.538279	0.483899	0.490681	0.572956	0.55526	0.550823	1.18179	1.04907	1.1935	1.43366	1.11467	1.28849	1.40582	1.11557	0.820702	0.894674	0.562857	0.595122	0.452927	0.589555	0.471885	0.486654	1.05521	0.908628	0.813748	0.979986	0.840397	0.909095	0.638058	0.859562	0.900472	0.48109	0.93461	1.10945	0.840833	0.818211	0.750859	0.925151
	L-Proline	1.10075	1.37716	1.22062	1.38808	0.7362	2.10609	2.46721	2.1481	0.569914	0.270238	0.537278	0.473603	0.604932	0.578924	0.758849	0.508362	1.59733	1.28855	1.76011	1.28189	1.54461	1.64487	1.72781	1.54629	0.834869	0.859144	0.626747	0.676947	0.687698	0.625705	0.489883	0.671731	1.17983	1.09155	0.954982	1.11977	0.85626	0.935496	0.582597	0.879058	0.968037	0.236623	1.07022	0.962633	0.873802	0.791315	0.888494	0.890788
	L-Valine	1.13577	1.17367	1.15541	1.31393	0.673425	1.37932	1.4536	1.27467	0.770795	0.375325	0.785518	0.590186	0.691645	0.696765	0.857076	0.567723	1.27678	1.12035	1.18127	1.13486	1.07268	1.22934	1.22602	1.21405	0.940416	0.827823	0.722914	0.802321	0.986198	0.805388	0.642276	0.758676	1.13393	0.953679	0.98924	1.21399	0.856172	0.959859	0.535206	0.839147	0.862559	0.2594	0.868381	0.928812	0.829989	0.822032	0.863517	1.012
	L-Threonine	1.1419	1.56298	1.47439	1.67668	0.834045	2.68126	3.14616	3.43863	0.611986	0.360178	0.62236	0.529625	0.672339	0.54916	0.796278	0.543649	1.74781	1.30318	2.00963	1.69476	1.49262	1.75257	1.83635	1.59629	0.804839	0.934923	0.618299	0.630494	0.643523	0.652037	0.427112	0.629799	1.17087	1.05966	0.897856	1.11442	0.881916	0.939216	0.695478	0.847998	1.01327	0.387092	1.02353	1.13219	0.911326	0.978627	0.919773	0.92902
	L-Leucine and L-Isoleucine	1.30713	1.58713	1.41875	1.61339	0.809162	1.91108	2.25265	3.25504	0.80447	0.82021	1.14065	0.796078	0.999247	0.667319	0.867209	0.841281	1.52465	1.23267	1.55389	2.30633	1.17494	1.42523	1.45838	1.33996	0.852464	1.11927	0.968485	0.880833	0.877466	1.18998	0.601717	0.880073	1.05508	0.931778	0.850682	1.52944	0.984889	0.958994	1.15647	0.966203	0.950499	0.669819	0.898463	1.30045	0.917431	1.36172	0.976669	1.08641
	L-Asparagine	2.22733	2.73641	1.93167	2.19669	1.19879	3.80562	4.25635	7.21496	0.838446	0.691855	0.87392	0.821064	1.06753	0.645323	0.947323	0.861565	1.9943	1.51817	2.03071	3.2928	1.59355	2.0954	2.57292	1.40892	0.838878	1.13357	0.749955	0.606038	0.690246	1.18539	0.480458	0.864144	1.21357	1.10417	0.975521	1.42546	1.01499	1.36675	1.31187	1.06468	1.06904	0.815346	1.0185	2.04213	1.2049	1.70411	1.23829	1.10689
	L-Aspartate	0.980803	1.98288	1.76966	2.01245	0.953623	3.54692	4.5941	5.05702	0.598873	0.297282	0.554121	0.479301	0.416811	0.478429	0.679097	0.381232	1.66963	1.13371	2.22609	1.52851	1.31005	1.60141	1.23817	1.64292	0.785422	1.01796	0.517825	0.537798	0.596687	0.434738	0.383936	0.507777	1.15923	1.00768	0.869138	1.17215	0.826373	0.714086	0.544258	0.572349	0.944306	0.322586	1.14155	1.06835	0.80331	0.873845	0.978318	0.942222
	L-Glutamine	10.1967	5.13329	7.28793	8.28782	0.917405	2.46008	4.07981	48.0017	0.491827	7.95066	1.86934	3.68013	5.58081	0.64596	0.767589	1.9664	3.42812	1.66903	2.50638	27.5865	2.53808	1.99746	4.54791	1.74207	0.627936	0.935451	0.632522	0.575557	1.31905	3.81145	0.44286	1.61675	1.13729	0.925893	1.57851	5.76672	1.11681	19.484	13.7993	1.50995	1.36061	13.3667	1.65559	20.7081	0.864654	19.5416	1.11841	0.713769
	L-Lysine	1.38852	2.16608	2.26378	2.57436	1.21182	6.19047	7.81165	8.91291	0.512686	0.325264	0.498672	0.466918	0.657158	0.468178	0.749198	0.481821	2.32522	1.65992	2.95484	2.40095	1.9758	2.39217	2.53763	1.84742	0.686083	0.917576	0.548274	0.508022	0.48892	0.214038	0.305708	0.477629	1.18764	1.11855	0.988849	1.25053	0.904539	0.952043	0.753954	0.826996	1.09692	0.451011	1.27124	1.3412	0.931729	1.03114	0.874649	0.774549
	L-Glutamate	0.961536	1.67869	1.65377	1.88066	0.897871	3.69672	4.95627	4.83452	0.626948	0.256609	0.461809	0.472717	0.505321	0.527812	0.739293	0.390846	1.97552	1.25312	2.33079	1.50064	1.48624	1.95409	1.50752	1.64265	0.733805	0.995342	0.512979	0.510677	0.597497	0.519686	0.315754	0.510201	1.12874	1.00032	0.839547	1.01083	0.823495	0.672437	0.507221	0.641865	0.887991	0.344257	0.923926	1.02025	0.801658	0.781232	0.925634	0.879995
	L-Methionine	1.47714	1.94295	1.89439	2.15429	0.968938	2.56851	3.13232	6.89353	0.759045	1.00686	1.20951	0.741073	0.944801	0.49057	0.689535	0.822969	1.08328	0.924187	1.43345	3.7634	0.89896	1.3621	1.40091	0.989455	0.693678	1.34418	0.989979	0.547648	0.550898	1.42889	0.306316	0.793052	0.689061	0.794761	0.599755	1.02105	0.833682	1.08713	1.70204	0.762991	0.911869	1.42091	0.651827	1.7806	0.930569	1.90147	0.990208	0.93076
	L-Histidine	1.19514	1.66216	1.65208	1.87874	0.913579	3.37536	3.98322	4.16542	0.555206	0.280322	0.520353	0.442338	0.589889	0.502527	0.709469	0.466983	1.94431	1.39938	2.30938	1.69997	1.5479	1.95834	1.96005	1.72552	0.768896	0.842501	0.570547	0.553189	0.589076	0.230349	0.376624	0.547321	1.2148	1.11522	0.981263	1.21766	0.920174	0.945819	0.619091	0.872422	1.01213	0.316036	1.18366	1.15789	0.872334	0.903775	0.875842	0.825976
	L-Phenylalanine	1.04316	1.29816	1.29524	1.47295	0.745782	2.13895	2.42835	2.1575	0.925732	0.553197	1.04677	0.882072	1.0919	0.869958	1.25276	0.860962	1.7366	1.52629	1.79825	1.54805	1.35815	1.60309	1.67193	1.4455	0.736268	0.85807	0.936712	1.11282	1.20169	1.12845	0.781963	1.04162	1.25313	1.19447	1.06124	1.37432	1.07405	1.0729	0.777942	1.13243	1.20802	0.421297	1.19704	1.28902	1.06045	1.10852	0.965132	1.10366
	L-Arginine	1.38096	2.10463	2.09198	2.379	1.17596	4.64633	5.56396	6.89171	0.525889	0.391721	0.632346	0.528065	0.735258	0.51621	0.847412	0.458829	2.21069	1.61216	2.72832	2.61075	1.76064	2.21165	2.38531	1.70825	0.74698	1.02536	0.605025	0.555107	0.534574	0.271794	0.302719	0.539095	1.24305	1.11263	0.953716	1.32151	1.01973	1.02864	0.778988	0.859553	1.14538	0.560199	1.02066	1.31391	0.924469	1.05032	0.969107	0.855215
	L-Tyrosine	1.12819	1.49118	1.4925	1.69727	0.851449	2.44352	2.65805	2.57013	0.631014	0.346795	0.681584	0.567466	0.733502	0.610989	0.917379	0.600721	1.79677	1.40026	1.96524	1.57537	1.5044	1.72795	1.79352	1.58742	0.82027	0.891818	0.675315	0.6923	0.725073	0.672882	0.490745	0.64318	1.17338	1.10556	0.934337	1.26527	0.924268	0.990592	0.661249	0.909596	1.01111	0.323909	1.06305	1.10572	0.882819	0.888302	0.901316	0.914738
	L-Tryptophan	0.97276	0.778897	0.933352	1.06141	0.445534	1.77196	2.17888	2.28777	2.77259	1.50063	3.09859	2.85697	3.16543	2.48876	3.6862	2.4953	2.00489	1.77886	1.75814	1.40464	1.15627	1.38038	1.36228	1.06373	0.880107	1.06529	2.82509	3.53031	3.82534	2.72361	2.43482	2.8886	2.40113	2.35441	2.38514	2.9187	2.49052	2.73029	1.55913	2.92115	1.20303	0.323801	1.27605	1.15328	1.04244	1.08199	0.8753	1.2142
	Cystine	1.46147	2.42114	2.29894	2.61435	1.21208	5.43336	7.02478	7.83555	0.505832	0.282868	0.530264	0.503232	0.653078	0.522487	0.847239	0.508627	2.27212	1.65116	2.90096	1.94577	1.90774	2.37857	2.52317	2.15114	0.850213	0.948963	0.554227	0.621176	0.618482	0.444234	0.405207	0.542627	1.41021	1.22436	1.12031	1.33693	1.00822	1.08079	0.659481	0.808631	1.14533	0.290727	1.51074	1.17314	0.827374	1.00974	0.956999	0.79431
[truncated: 331 more columns]

## Sheet: Fig 1 e
		Fig. 1e
		siRNA	Serine
		SLC25A48	1.977	0.81	0.61
		SLC35G3	1.3	1.074	1.025
		SLC26A1	0.744	0.918	1.792
		SLC25A47	1.023	1.219	1.4
		SLC25A42	1.072	1.586	0.985
		SLC38A2	1.212	1.279	1.166
		SLC6A8	1.221	1.219	1.219
		SLC4A9	1.628	0.918	1.352
		SLC25A28	2.366	0.896	0.653
		SLC25A15	1.303	1.215	1.636
		SLC25A1	2.871	1.223	0.693
		SLC12A4	4.819	1.454	1.575

## Sheet: Fig 1 f
		Fig. 1f
		siRNA Cell Lines	HCT116			HCT116 p21-/-
		SLC12A4	0.785984	0.703958	0.721704	0.552587	0.528867	0.49375
		SLC26A1	0.692851	0.782121	0.746213	0.540563	0.562215	0.607669
		SLC4A9	0.829508	0.883519	0.928585	0.641761	0.618032	0.65964
		SLC25A48	0.881875	0.975058	0.964456	0.826899	0.719184	0.589131
		SLC25A47	0.80389	0.713844	0.753669	0.814671	0.662598	0.677466
		SLC25A42	0.905196	0.914884	1.01921	0.718217	0.706432	0.736188
		SLC6A8	0.948173	0.833834	0.849884	0.759541	0.642824	0.873724
		SLC35G3	0.748414	0.66859	0.800058	0.806392	0.717207	0.839295
		SLC38A2	0.771088	0.678004	0.68068	0.802052	0.709861	0.852149
		SLC25A28	0.973141	0.960389	1.02621	1.07925	0.978173	0.441569
		SLC25A15	0.812423	0.718135	0.748693	0.790633	0.754268	0.966708
		SLC25A1	0.947086	0.917399	0.95275	0.816584	0.841517	0.871312

## Sheet: Fig 1 h
	Fig. 1h
	siRNA Cell Lines	HCT116			HCT116 p21-/-
	SLC6A14	3.32422	3.52152	3.5403	3.60089	3.81423	3.43307
	SLC25A15	2.82335	2.78382	2.71669	3.12711	3.49628	2.91556
	SLC12A4	2.73364	2.76447	2.59425	2.83435	2.67389	2.71489
	SLC25A1	2.74073	2.51309	2.60758	2.57927	2.78362	2.2964
	SLC38A2	2.43073	2.20229	2.40314	2.36052	2.8548	1.83891
	SLC38A7	2.06606	2.01042	1.95409	1.35656	1.55356	1.25813
	SLC1A4	2.01007	1.88088	2.01252	1.08195	0.935695	0.879927
	SLC7A8	1.81433	1.93534	1.90868	0.904058	0.990769	0.814739
	SLC25A28	1.83115	1.89024	1.77973	0.889385	0.884049	0.853196
	SLC38A1	1.75824	1.82626	1.74165	0.851941	0.988851	0.853383
	SLC36A1	1.71662	1.79718	1.7918	0.733375	0.768524	0.89439
	SLC6A9	1.71022	1.79802	1.753	0.97564	0.6101	1.70248
	SLC38A5	1.72474	1.64869	1.8141	1.0532	1.18715	0.961657
	SLC1A5	1.10611	1.22726	1.16012	2.27603	2.21568	2.01681
	NTC	0.953408	0.979589	1.067	1.06114	0.986583	0.952278

## Sheet: Fig 1 i
	Fig. 1i
	siRNA Cell Lines	HCT116			HCT116 p21-/-
	SLC6A14	0.328463	0.285343	0.25255	0.0933029	0.0996917	0.161117
	SLC12A4	0.630692	0.700432	0.618643	0.254753	0.328157	0.425719
	SLC25A15	0.687404	0.699394	0.748093	0.155194	0.164578	0.162847
	SLC38A2	0.765543	0.764564	0.701827	0.497327	0.473768	0.506444
	SLC25A1	0.781539	0.68871	0.76311	0.409415	0.279576	0.446416
	SLC1A5	0.913423	0.883983	0.771122	0.525211	0.577453	0.622041
	No Ser/Gly	0.879591	0.86956	0.90725	0.354578	0.372213	0.424189
	SLC25A28	0.933959	0.938292	0.883331	0.842987	0.800129	0.84678
	SLC38A1	0.85122	1.02032	1.07392	1.0455	1.00637	1.19916
	SLC6A9	0.970966	0.929864	1.08412	1.0258	1.28927	1.06047
	NTC	0.950638	1.04272	1.00664	1.07851	0.995053	0.92644
	SLC38A5	1.02961	1.04255	0.987081	0.938419	0.775572	0.802391
	SLC38A7	1.06436	1.00966	1.01483	0.824087	0.789148	0.699173
	SLC36A1	1.04816	1.06172	0.991948	1.05655	0.999978	1.00144
	SLC7A8	1.06457	1.03729	1.02901	1.02334	1.02241	0.965039
	SLC1A4	1.00812	1.07537	1.04771	0.953127	1.05515	0.96271
