# Supplementary material for: Phenotypic profiling of solute carriers characterizes serine transport in cancer
Source: Nat Metab. 2023 Dec 8;5(12):2148–68. doi: 10.1038/s42255-023-00936-2 (PMC10730406; doi:10.1038/s42255-023-00936-2)
Supplement: Supplementary file 4 — Statistical source data related to Fig. 2. [file 42255_2023_936_MOESM4_ESM.xlsx]

## Sheet: Fig 2 b
	Fig. 2b
	PHGDH
	NTC	CRISPR-1	CRISPR-2
	1	0.0242344	0.00849703
	1	0.0372108	0.019249
	1	0.0273424	0.0147659
	PSAT1
	NTC	CRISPR-1	CRISPR-2
	1	1.05556	0.990991
	1	2.20449	1.27118
	1	1.64894	1.09091
	PSPH
	NTC	CRISPR-1	CRISPR-2
	1	1.85185	1.91985
	1	2.7952	1.69583
	1	1.76576	1.63726

## Sheet: Fig 2 c
	Fig. 2c
	HCT116; PHGDH CRISPR
	Time (Hr) Cell Lines	NTC - Plus Ser/Gly			NTC - No Ser/Gly			PHGDH CRISPR-1 - Plus Ser/Gly			PHGDH CRISPR-1 - No Ser/Gly
	0	0.979828	1.00323	1.01695	0.979828	1.00323	1.01695	0.967595	1.00596	1.02644	0.967595	1.00596	1.02644
	48	4.8088	4.34617	4.09332	3.0813	2.3977	2.36621	4.19709	5.32342	5.01681	0.559585	0.592358	0.536581
	72	12.0048	12.3873	12.367		9.21779	9.20042	9.7537	8.84456	9.65137	0.15063	0.243356	0.332616
	HCT116; PHGDH CRISPR; PHGDH CRISPR-1
	Time (Hr) Media	Plus Ser/Gly			No Ser			No Gly			No Ser/Gly			No Ser + FA			No Gly + FA			No Ser/Gly + FA
	0	0.967595	1.00596	1.02644	0.967595	1.00596	1.02644	0.967595	1.00596	1.02644	0.967595	1.00596	1.02644	0.967595	1.00596	1.02644	0.967595	1.00596	1.02644	0.967595	1.00596	1.02644
	48	4.19709	5.32342	5.01681	0.746534	0.914023	0.829806	4.63448	6.04735	5.67644	0.559585	0.592358	0.536581	3.26557	2.5036	3.33388	5.58309	5.31318	4.07324	0.499238	0.659401	0.678703
	72	9.7537	8.84456	9.65137	0.739049	0.771744	0.810977	9.88038	6.34191	10.0739	0.15063	0.243356	0.332616		11.9724	10.0961	7.43816	7.58501	7.28548	0.683508	0.432353	0.430699

## Sheet: Fig 2 e
		Fig. 2e
		Cell lines Metabolite	Glucose M+6 - 15 min			Glucose M+6 - 180 min
		NTC	7.69481e+06	6.83037e+06	4.2676e+06	5.01936e+06	3.14608e+06	4.04531e+06
		PHGDH CRISPR-1	5.35791e+06	4.3955e+06	6.21857e+06	3.8428e+06	3.96168e+06	3.8886e+06
			3PG M+3 - 15 min			3PG M+3 - 180 min
		NTC	31721.3	102310	148274	57351.8	88228.5	100752
		PHGDH CRISPR-1	1.67908e+06	1.51381e+06	1.32874e+06	1.13384e+06	979172	1.05476e+06
			Serine M+3 - 15 min			Serine M+3 - 180 min
		NTC	50787	43936.8	59946.5	53551.6	69504.5	82201.6
		PHGDH CRISPR-1	0	0	0	0	0	0

## Sheet: Fig 2 g
		Fig. 2g
		Cell lines Metabolite	Serine - 15 min			Serine M+4 - 15 min			Serine - 180 min			Serine M+4 - 15 min
		NTC	345143	457320	440031	899964	1.12156e+06	1.09209e+06	128665	251495	321080	1.46808e+06	1.474e+06	963850
		PHGDH CRISPR-1	2.78089e+06	1.32513e+06	932975	4.82861e+06	4.32347e+06	4.89904e+06	280465	377790		4.70206e+06	3.66763e+06

## Sheet: Fig 2 h
		Fig. 2h
		SLC Cell line	NTC			PHGDH CRISPR-1
		SLC25A15	1	1	1	4.975	43.587	44.704
		SLC6A14	1	1	1	4.1	29.678	39.965
		SLC1A4	1	1	1	0.686	8.369	29.94
		SLC12A4	1	1	1	0.967	12.221	9.711
		SLC7A8	1	1	1	0.49	11.734	8.55
		SLC1A5	1	1	1	0.57	10.659	1.597
		SLC38A2	1	1	1	1.157	3.079	2.553
		SLC38A7	1	1	1	0.565	1.497	3.325
		SLC6A9	1	1	1	2.731	1.37	0.561
		SLC36A1	1	1	1	0.792	1.237	2.547
		SLC38A1	1	1	1	0.759	2.572	1.2
		SLC25A1	1	1	1	0.422	0.75	2.251
		SLC25A28	1	1	1	0.269	0.534	0.241
		SLC38A5	1	1	1	0.343	0.26	0.13
		PHGDH	1	1	1	0.013	0.143	0.065

## Sheet: Fig 2 i
		Fig. 2i
		SLC Cell line	Parental			NTC			PHGDH CRISPR-1			PHGDH CRISPR-2
		No SG	0.879591	0.86956	0.90725	0.950674	0.848401	1.07163	0.259643	0.228802	0.324008	0.180564	0.186553	0.175398
		SLC6A14	0.328463	0.285343	0.25255	0.525538	0.574876	0.623773	0.244446	0.23943	0.352117	0.413006	0.49932	0.463162
		SCL12A4	0.630692	0.700432	0.618643	0.639632	0.690035	0.663346	0.673741	0.758517	0.726633	0.732586	0.666895	0.923143
		SLC25A15	0.687404	0.699394	0.748093	0.582768	0.536257	0.616578	0.739099	0.705675	0.774062	0.71009	0.82298	0.67629
		SLC1A5	0.913423	0.883983	0.771122	0.891608	0.886652	0.83636	0.801973	0.808728	0.887296	0.616814	0.727121	0.866623
		SLC25A1	0.781539	0.68871	0.76311	0.867013	0.885	0.922151	0.613201	0.927921	0.793332	0.896942	0.956756	0.808719
		SLC38A2	0.765543	0.764564	0.701827	0.761068	0.789335	0.815105	0.806493	0.841357	0.911582	0.88328	0.842331	0.930105
		SLC1A4	1.00812	1.07537	1.04771	1.00203	0.989623	1.00412	0.824968	0.930305	0.963679	0.884103	0.913935	1.01642
		SLC38A7	1.06436	1.00966	1.01483	0.914772	0.859707	0.933714	0.908105	0.877264	0.962835	0.986176	1.00796	1.00051
		SLC25A28	0.933959	0.938292	0.883331	0.950454	0.931805	0.907614	0.837632	0.999487	0.933185	1.10887	1.06575	0.936468
		NTC	0.950638	1.04272	1.00664	0.946636	1.03217	1.02119	0.979373	1.00853	1.0121	0.947772	0.925352	1.12688
		SLC38A1	0.85122	1.02032	1.07392	1.03485	0.944066	1.03529	0.875873	0.927971	0.931	0.981085	1.09884	1.19313
		SLC6A9	0.970966	0.929864	1.08412	0.949683	0.97549	1.02075	1.02338	0.937407	1.02993	1.00807	1.05067	1.18093
		SLC38A5	1.02961	1.04255	0.987081	1.0089	0.964514	0.986833	0.96348	1.07979	1.04855	1.05924	1.0698	1.04868
		SLC7A8	1.06457	1.03729	1.02901	0.969249	0.993258	1.08639	0.951213	0.995762	1.11113	1.11445	1.08099	1.03981
		SLC36A1	1.04816	1.06172	0.991948	0.983603	0.96991	1.04208	0.996159	0.992782	1.07468	1.1079	1.09978	1.0698
