# Supplementary material for: Phenotypic profiling of solute carriers characterizes serine transport in cancer
Source: Nat Metab. 2023 Dec 8;5(12):2148–68. doi: 10.1038/s42255-023-00936-2 (PMC10730406; doi:10.1038/s42255-023-00936-2)
Supplement: Supplementary file 5 — Statistical source data related to Fig. 3. [file 42255_2023_936_MOESM5_ESM.xlsx]

## Sheet: Fig 3 b
	Fig. 3b
	SLC6A14	SLC12A4	SLC25A15	SLC38A2	SLC38A1	SLC38A5	SLC1A5	Parental	SLC1A4	NTC_2	NTC_1
	6.16472	6.26294	6.71133	8.88672	11.0551	11.0757	11.1589	11.928	11.9719	12.9727	15.2644
	4.64038	6.18988	6.26565	8.7194	10.9156	11.2752	10.888	12.6003	11.8981	12.6362	15.0285
	3.22506	5.86916	6.1812	8.91779	11.1782	11.0337	11.4524	10.2267	12.3001	12.997	15.2546

## Sheet: Fig 3 c
	Fig. 3c
	SLC38A2-EGFPN1	SLC6A14-EGFPN1	SLC12A4-EGFPN1	SLC1A5-EGFPN1	SLC38A5-EGFPN1	EGFPN1	SLC12A4-FLAG	SLC38A2-FLAG	SLC6A14-FLAG	SLC25A15-FLAG	SLC1A5-FLAG	FLAG	SLC38A5-FLAG
	9.74	8.506	7.504	6.921	5.903	4.771	10.281	6.356	6.823	5.127	6.053	5.44	4.075
	9.896	9.135	7.259	6.484	4.099	4.73	9.732	8.347	8.265	8.436	6.109	5.387	4.308
	10.063	9.137	7.341	6.439	4.589	4.819	10.176	8.764	6.399	7.614	6.235	5.146	3.989

## Sheet: Fig. 3 e
		Fig. 3e	SLC6A14 siRNA
		Time (min)	Parental			NTC			SLC6A14-siRNA
		0	0	0	0	0	0	0	0	0	0
		1	5.45435e+06	5.3207e+06	4.539e+06	4.13235e+06	5.22234e+06	5.21393e+06	3.90312e+06	3.3078e+06	2.95714e+06
		3	10300000	10200000	11000000	8.52675e+06	7.95876e+06	8.0748e+06	7.02313e+06	5.68845e+06	5.32575e+06
		6	8.31282e+06	11900000	13100000	8.7656e+06	8.2233e+06	9.4111e+06	7.73113e+06	7.89809e+06	7.17759e+06
			SLC12A4 siRNA
		Time (min)	Parental			NTC			SLC12A4-siRNA
		0	0	0	0	0	0	0	0	0	0
		1	1.68666e+06	1.84135e+06	1.76602e+06	2.13587e+06	2.16595e+06	2.18712e+06	1.62117e+06	1.68747e+06	918847
		3	6.46603e+06	8.04632e+06	4.47501e+06	4.81745e+06	6.56535e+06	4.3863e+06	4.72866e+06	3.74449e+06	4.28269e+06
		6	9.74028e+06	10200000	7.69763e+06	8.99227e+06	8202863	6.04049e+06	5.9535e+06	7.00837e+06	2.86095e+06
			SLC25A15 siRNA
		Time (min)	Parental			NTC			SLC25A15-siRNA
		0	0	0	0	0	0	0	0	0	0
		1	1.68666e+06	1.84135e+06	1.76602e+06	2.13587e+06	2.16595e+06	2.18712e+06	2.14404e+06	1.62917e+06	2.05551e+06
		3	6.46603e+06	8.04632e+06	4.47501e+06	4.81745e+06	6.56535e+06	4.3863e+06	3.25539e+06	4.49105e+06	3.03811e+06
		6	9.74028e+06	10200000	7.69763e+06	8.99227e+06	8202863	6.04049e+06	7.20721e+06	7.826e+06	7.01965e+06

## Sheet: Fig. 3 f
		Fig. 3f
		SLC12A4	SLC6A14	SLC25A15	SLC38A2	SLC38A5	SLC1A5
		0.827893	0.8549	0.791529	0.919091	0.875931	1.18647
		0.800087	0.75773	0.90741	0.87642	0.857369	1.13003
		0.584805	0.696352	0.757342	0.839014	0.961886	1.17212

## Sheet: Fig. 3 g
		Fig. 3g
		Time (min)	EV-EGFPN1			SLC6A14-EGFPN1
		0	0	0	0	0	0	0
		1	742231	738589	708331	1.24379e+06	1.41362e+06	920249
		3	1.56815e+06	1.0564e+06	1.65515e+06	1.95878e+06	1.63707e+06	3.07661e+06
		6	2.15328e+06	1.58868e+06	1.89662e+06	2.46465e+06	3.15826e+06	3.8614e+06
			EV-EGFPN1			SLC6A14-EGFPN1
			Mean	SEM	N	Mean	SEM	N
		AUC	7480283	721383	9	12091374	1741067	9

## Sheet: Fig. 3 h
		Fig. 3h
		Time (min)	EV-EGFPN1			SLC12A4-EGFPN1
		0	0	0	0	0	0	0
		1	450425	525096	472403	598917	598268	509795
		3	672321	993878	456148	1.19579e+06	614670	791837
		6	1.35397e+06	1.48526e+06	1.00995e+06	859218	610041	1.23926e+06

## Sheet: Fig. 3 i
			Fig. 3i	NTC			SLC12A4-siRNA
			Cysteine	0.010787	0.006535	-0.0060686	0.00586429	0.00585926	9.28631e-05
			Proline	0.0588328	0.0026409	-0.0477254	-0.0527848	-0.124654	-0.0829906
			Glutamate	0.0221109	0.04494	-0.0134618	-0.0172805	-0.0233951	-0.0141609
			Aspartate	0.0479478	0.0554964	0.0469787	0.032116	0.0324778	0.0273836
			Methionine	0.0974347	0.119733	0.0999755	0.067714	0.06699	0.0508043
			Tryptophan	0.13833	0.0965082	0.115195	0.0525064	0.0617948	0.0332389
			Phenylalanine	0.108224	0.13207	0.112229	0.0641559	0.0766243	0.0516048
			Tyrosine	0.173096	0.166191	0.164029	0.0982722	0.120518	0.0666835
			Threonine	0.253373	0.274537	0.215156	0.117925	0.089874	0.0940455
			Lysine	0.278926	0.291345	0.193129	0.0165992	-0.0674905	-0.00655453
			Isoleucine	0.2608	0.306934	0.268422	0.151179	0.15658	0.12903
			Alanine	0.428495	0.360879	0.251282	0.118959	0.0915332	0.133052
			Glycine	0.394457	0.354376	0.304803	0.176863	0.143409	-0.167515
			Valine	0.39588	0.398328	0.324736	0.187096	0.216017	0.141213
			Leucine	0.416506	0.4958	0.427382	0.242081	0.248046	0.214328
			Serine	0.477586	0.549769	0.485662	0.284626	0.298507	0.244717
