# Supplementary material for: Phenotypic profiling of solute carriers characterizes serine transport in cancer
Source: Nat Metab. 2023 Dec 8;5(12):2148–68. doi: 10.1038/s42255-023-00936-2 (PMC10730406; doi:10.1038/s42255-023-00936-2)
Supplement: Supplementary file 6 — Statistical source data related to Fig. 4. [file 42255_2023_936_MOESM6_ESM.xlsx]

## Sheet: Fig 4 c
	Fig. 4c	Mitochondrial Fraction			Cytosol Fraction
		NTC	SLC25A15 - siRNA		NTC	SLC25A15 - siRNA
		5.5475e-09	5.16305e-09		8.29287e-07	7.44992e-07
		7.38279e-09	2.8546e-09		8.26978e-07	7.54848e-07
		6.85845e-09	4.46148e-09		7.06835e-07	7.97472e-07

## Sheet: Fig 4 d
	Fig. 4d	Mitochondrial Fraction			Cytosol Fraction
		NTC	SLC25A15 - siRNA		NTC	SLC25A15 - siRNA
		2.1322e-08	1.74508e-08		3.8852e-06	2.83638e-06
		2.8228e-08	2.53488e-08		4.1819e-06	2.89107e-06
		3.8722e-08	2.57869e-10		2.489e-06	1.65963e-06

## Sheet: Fig 4 f
	Fig. 4f	Mitochondrial Fraction			Cytosol Fraction
		EV-FLAG	SLC25A15 - FLAG		EV-FLAG	SLC25A15 - FLAG
		6.05894e-09	1.00348e-08		6.84642e-07	1.08049e-06
		5.32643e-09	9.44198e-09		7.20564e-07	1.26752e-06
		5.42379e-09	1.39144e-08		7.05665e-07	1.02127e-06

## Sheet: Fig 4 g
	Fig. 4g	Mitochondrial Fraction			Cytosol Fraction
		EV-FLAG	SLC25A15 - FLAG		EV-FLAG	SLC25A15 - FLAG
		2.6657e-08	1.3985e-07		2.7714e-06	5.2101e-06
		3.4731e-08	6.027e-08		3.0484e-06	5.7855e-06
		6.7024e-08	1.181e-07		2.9598e-06	4.2695e-06

## Sheet: Fig 4h
		Fig. 4h	NTC			SLC25A15 - siRNA
		Cysteine	0.010787	0.006535	-0.0060686	0.00994635	0.00426093	0.00301932
		Proline	0.0588328	0.0026409	-0.0477254	0.0370675	-0.012308	0.00644681
		Glutamate	0.0221109	0.04494	-0.0134618	0.00723454	-0.0123791	0.00336533
		Aspartate	0.0479478	0.0554964	0.0469787	0.0338005	0.0342476	0.0278493
		Methionine	0.0974347	0.119733	0.0999755	0.0719486	0.0810818	0.0597187
		Tryptophan	0.13833	0.0965082	0.115195	0.0742531	0.0602203	0.047602
		Phenylalanine	0.108224	0.13207	0.112229	0.0775877	0.079881	0.0650046
		Tyrosine	0.173096	0.166191	0.164029	0.135533	0.128325	0.0886556
		Threonine	0.253373	0.274537	0.215156	0.182808	0.167772	0.109195
		Lysine	0.278926	0.291345	0.193129	0.108456	0.134108	0.110919
		Isoleucine	0.2608	0.306934	0.268422	0.188829	0.202235	0.166214
		Alanine	0.428495	0.360879	0.251282	0.280089	0.245756	0.218777
		Glycine	0.394457	0.354376	0.304803	0.2825	0.254199	0.167753
		Valine	0.39588	0.398328	0.324736	0.305829	0.294355	0.19465
		Leucine	0.416506	0.4958	0.427382	0.282063	0.311397	0.261803
		Serine	0.477586	0.549769	0.485662	0.332145	0.355816	0.293477
