# Supplementary material for: Phenotypic profiling of solute carriers characterizes serine transport in cancer
Source: Nat Metab. 2023 Dec 8;5(12):2148–68. doi: 10.1038/s42255-023-00936-2 (PMC10730406; doi:10.1038/s42255-023-00936-2)
Supplement: Supplementary file 7 — Statistical source data related to Fig. 5. [file 42255_2023_936_MOESM7_ESM.xlsx]

## Sheet: Fig 5 a
		Fig. 5a	NTC			SLC6A14_siRNA-1			SLC6A14_siRNA-3
		Cysteine	0.010787	0.006535	-0.0060686	-0.00123576	0.0140452	0.0301482	0.00553523	-0.00370818	0.0106117
		Proline	0.0588328	0.0026409	-0.0477254	-0.120821	-0.0564478	-0.0894429	0.0439385	-0.00504144	-0.065841
		Glutamate	0.0221109	0.04494	-0.0134618	-0.0350884	-0.0250484	-0.0462524	-0.00649103	-0.0189434	-0.0426982
		Aspartate	0.0479478	0.0554964	0.0469787	0.0166361	0.0367403	0.0279754	0.0355467	0.0370583	0.032742
		Methionine	0.0974347	0.119733	0.0999755	0.0325212	0.0853504	0.0837356	0.0758101	0.082154	0.0679604
		Tryptophan	0.13833	0.0965082	0.115195	0.0404139	0.0310972	0.0476588	0.0622524	0.0704224	0.0736698
		Phenylalanine	0.108224	0.13207	0.112229	0.0326386	0.0780532	0.0794636	0.079375	0.0772664	0.0773082
		Tyrosine	0.173096	0.166191	0.164029	0.0383607	0.0895025	0.0842071	0.140185	0.132524	0.123711
		Threonine	0.253373	0.274537	0.215156	0.043582	0.135094	0.14327	0.199128	0.171969	0.1482
		Lysine	0.278926	0.291345	0.193129	-0.0858803	0.0432587	0.128035	0.138856	0.114422	0.0222911
		Isoleucine	0.2608	0.306934	0.268422	0.102329	0.178092	0.211303	0.22552	0.2152	0.188148
		Alanine	0.428495	0.360879	0.251282	0.0896	0.173572	0.177526	0.313303	0.280189	0.169706
		Glycine	0.394457	0.354376	0.304803	0.0745043	0.22246	0.191314	0.29731	0.247861	0.204679
		Valine	0.39588	0.398328	0.324736	0.0517156	0.23968	0.232246	0.328125	0.291068	0.246099
		Leucine	0.416506	0.4958	0.427382	0.178959	0.268886	0.330308	0.360285	0.339727	0.31215
		Serine	0.477586	0.549769	0.485662	0.193245	0.322923	0.355257	0.400097	0.393854	0.342203

## Sheet: Fig 5 b
		Fig. 5b	NTC			SLC6A14siRNA
		L-Serine (13C3 + 15N)	0.979127	0.989835	1.03104	0.457399	0.507562	0.509789
		L-Methionine (13C5 + 15N)	1.0822	0.93516	0.982641	0.461293	0.530262	0.572581
		L-Tryptophan (13C11 + 15N2)	0.967299	0.97961	1.05309	0.537958	0.632726	0.632983
		L-Phenylalanine (13C9 + 15N)	1.00881	1.00196	0.989225	0.572321	0.613529	0.652169
		L-Leucine (13C6 + 15N) or L-Isoleucine (13C6 + 15N)	0.963003	0.987382	1.04962	0.616553	0.70201	0.719333
		L-Valine (13C5 + 15N)	0.980709	0.970933	1.04836	0.665928	0.731621	0.851277
		L-Glutamate (13C5 + 15N)	0.919817	0.869463	1.21072	1.11606	1.10524	1.58464
		L-Aspartate (13C4 + 15N)	0.89039	0.882217	1.22739	1.20723	1.2571	2.0574

## Sheet: Fig 5 c
		Fig. 5c
		Time (hours)	EV-EGFPN1			SLC6A14-EGFPN1
		0	1	1	1	1	1	1
		3	0	1.10939	1.13515	1.11658	1.11185	1.10169
		6	1.18218	1.2039	1.24348	1.25007	1.23005	1.23936
		9	1.30649	1.33745	1.38913	1.35328	1.33186	1.38197
		12	1.42525	1.40814	1.49366	1.46892	1.44201	1.45535
		15	1.49874	1.47022	1.59249	1.59933	1.55128	1.5395
		18	1.63952	1.5778	1.48612	1.72532	1.73029	1.67062
		21	1.74154	1.74329	1.88754	1.85296	1.86604	1.86681
		24	1.95513	1.8889	2.07286	2.11103	2.07622	2.08597
		27	2.15711	2.08918	2.29537	2.33712	2.31671	2.26455
		30	2.32593	2.32614	2.52489	2.56559	2.59995	2.49653
		33	2.62182	2.58572	2.80203	2.88261	2.87402	2.81847
		36	3.00614	2.88897	3.13471	3.25662	3.30974	3.21424
		39	3.49797	3.32604	3.6458	3.82825	4.00813	3.86233
		42	3.94231	3.76109	4.1653	4.29189	4.6751	4.30646
		45	4.40686	4.27044	4.70844	4.92067	5.4003	4.99162
		48	5.01918	4.82436	5.34392	5.61395	6.10833	5.53559
		51	5.6586	5.36052	5.98791	6.29719	6.16431	6.16588
		54	6.29654	6.04591	6.607	7.09054	7.87339	7.1296
		57	6.88927	6.63341	7.25512	7.94891	8.69956	7.71016
		60	7.4893	7.26828	7.90863	8.77244	9.65494	8.3612
		63	8.12635	7.98339	8.57751	9.7508	10.3139	9.48785
		66	8.67468	8.617	9.20662	10.8108	11.2495	10.3436
		69	9.23996	9.3535	9.74245	11.7555	12.1623	11.1726
		72	9.76158	10.0789	10.2979	12.898	13.1448	12.0094
		75	10.2276	10.4981	10.7387	14.0559	14.0303	12.7972
		78	10.6955	11.1546	11.2519	15.1097	14.8008	13.4582
		81	11.1287	11.6982	11.6069	16.2792	15.6492	14.1791
		84	11.5451	12.2637	11.9969	17.2183	16.487	14.7433
		87	12.0032	12.857	12.2614	18.2809	18.0551	15.2507

## Sheet: Fig 5 d
		Fig. 5d
		SLC6A14 CRISPR-1 - EGFPN1	SLC6A14 CRISPR-1 - SLC6A14-EGFPN1
		9.67	12.715
		9.614	12.747
		9.533	12.745

## Sheet: Fig 5 i
	Fig. 5i
	EGFPN1	SLC6A14-WT	SLC6A14-V128W	SLC6A14-V128G	SLC6A14-V128E
	32.003	34.173	25.153	24.517	23.066
	21.479	34.44	27.121	24.842	26.143
	22.77	31.516	27.45	24.736	24.138
