# Supplementary material for: Phenotypic profiling of solute carriers characterizes serine transport in cancer
Source: Nat Metab. 2023 Dec 8;5(12):2148–68. doi: 10.1038/s42255-023-00936-2 (PMC10730406; doi:10.1038/s42255-023-00936-2)
Supplement: Supplementary file 8 — Statistical source data related to Fig. 6. [file 42255_2023_936_MOESM8_ESM.xlsx]

## Sheet: Fig 6 a
		Fig. 6a
		SLC Cell line	NTC			PHGDH CRISPR-1			PHGDH CRISPR-2
		No SG	0.315973	0.36633	0.31942	0.154972	0.267985	0.278288	0.34303	0.236572	0.382411
		SLC6A14 + SLC25A15	0.565868	0.568054	0.591299	0.317824	0.251247	0.316938	0.418277	0.42659	0.433145
		SLC6A14 + SLC38A5	0.654771	0.672636	0.571795	0.287053	0.242669	0.291109	0.391484	0.328683	0.37082
		SLC6A14 + SLC12A4	0.583859	0.67789	0.669735	0.387477	0.318943	0.336239	0.453335	0.470009	0.528439
		SLC6A14 + SLC1A5	0.609458	0.687053	0.729214	0.321973	0.285468	0.308219	0.444927	0.433193	0.395807
		SLC6A14 + NTC1	0.784069	0.77768	0.686339	0.329899	0.315586	0.334654	0.633282	0.469249	0.518653
		Parental	0.884615	0.949054	0.96797	0.879342	0.924892	0.934542	0.958449	1.00629	0.996501
		NTC1 + NTC2	0.967087	1.00298	1.02993	0.950254	1.01594	1.0338	0.947476	1.02296	1.02956
		SLC6A14 + SLC38A2	1.07415	1.08529	0.950231	0.765397	0.749499	0.805632	0.936597	0.977594	1.02287

## Sheet: Fig 6 b
		Fig. 6b
		SLC Cell line	NTC			PHGDH CRISPR-1
		No SG	0.676391	0.802498	0.668422	0.403579	0.321966	0.387705
		SLC6A14 + SLC25A15	0.696733	0.692119	0.645144	0.486689	0.370751	0.485276
		SLC6A14 + SLC12A4	0.686527	0.677789	0.707568	0.503477	0.541956	0.369421
		SLC6A14 + SLC1A5	0.70617	0.748252	0.477305	0.475552	0.485442	0.492506
		SLC6A14 + SLC38A5	1.00375	0.739235	0.635288	0.52708	0.496828	0.64576
		SLC6A14 + NTC1	0.70624	0.874779	0.691351	0.755797	0.979527	0.990082
		SLC6A14 + SLC38A2	0.931011	0.947965	1.0244	0.819492	0.953858	0.93138
		Parental	1.09225	1.04807	1.14195	1.00047	0.955924	1.07834
		NTC1 + NTC2	1.03136	0.976139	0.992497	1.08948	0.798266	1.11225

## Sheet: Fig 6 c
		Fig. 6c
		Time (Hours)	EV - NTC			EV - SLC6A14/SLC25A15siRNAs			SLC25A15-FLAG - NTC			SLC25A15-FLAG - SLC6A14/SLC25A15siRNAs
		0	1	1	1	1	1	1	1	1	1	1	1	1
		3	0	1.10939	1.13515	1.10253	1.11809	1.14319	1.11133	1.14044	1.16399	1.13644	1.13781	1.156
		6	1.18218	1.2039	1.24348	1.2092	1.21946	1.25267	1.23305	1.27537	1.28403	1.25058	1.25605	1.27402
		9	1.30649	1.33745	1.38913	1.28275	1.32764	1.38266	1.35272	1.36676	1.35412	1.36628	1.34441	1.36596
		12	1.42525	1.40814	1.49366	1.36819	1.39702	1.4706	1.43623	1.46049	1.44762	1.44344	1.41837	1.44887
		15	1.49874	1.47022	1.59249	1.46196	1.47402	1.52305	1.52099	1.54133	1.53535	1.52846	1.52543	1.50797
		18	1.63952	1.5778	1.48612	1.5619	1.59181	1.63515	1.6738	1.72521	1.65767	1.67497	1.64796	1.64555
		21	1.74154	1.74329	1.88754	1.68731	1.69704	1.80026	1.91248	1.92441	1.8768	1.871	1.77918	1.83464
		24	1.95513	1.8889	2.07286	1.82866	1.87418	1.97663	2.14111	2.15863	2.0942	2.04674	1.99478	1.99236
		27	2.15711	2.08918	2.29537	1.99924	2.05652	2.17675	2.37828	2.38067	2.33393	2.20478	2.11739	2.16406
		30	2.32593	2.32614	2.52489	2.112	2.22133	2.39298	2.6435	2.64259	2.58485	2.34315	2.29935	2.32399
		33	2.62182	2.58572	2.80203	2.35336	2.37703	2.52744	3.0525	3.03445	2.92969	2.51362	2.53151	2.57182
		36	3.00614	2.88897	3.13471	2.49695	2.55384	2.81222	3.49262	3.45605	3.3466	2.67887	2.75935	2.84809
		39	3.49797	3.32604	3.6458	2.71875	2.90408	3.10416	4.05	4.0172	3.80895	3.09645	3.01813	3.13133
		42	3.94231	3.76109	4.1653	2.98066	3.1402	3.35746	4.52643	4.11433	4.19855	3.3692	3.24061	3.35335
		45	4.40686	4.27044	4.70844	3.19516	3.4302	3.56337	5.07214	5.17497	4.76921	3.70707	3.57601	3.65193
		48	5.01918	4.82436	5.34392	3.44701	3.6323	3.87709	5.62821	5.68726	5.23416	3.96802	3.83537	3.96296
		51	5.6586	5.36052	5.98791	3.73512	3.90277	4.16612	6.25314	5.95091	5.72944	4.33383	4.15249	4.27872
		54	6.29654	6.04591	6.607	4.00514	4.20857	4.43039	6.79254	6.78969	6.22136	4.69881	4.48177	4.53661
		57	6.88927	6.63341	7.25512	4.212	4.38425	4.71235	7.42335	7.73675	6.7104	5.0342	4.79312	4.90651
		60	7.4893	7.26828	7.90863	4.52481	4.63315	4.97923	7.924	8.31549	7.24307	5.41514	5.17143	5.25279
		63	8.12635	7.98339	8.57751	4.81469	4.92456	5.30241	8.41447	8.94331	7.73829	5.88153	5.5913	5.56768
		66	8.67468	8.617	9.20662	5.0257	5.13637	5.53382	8.87182	9.46061	8.16919	6.34671	5.96101	5.88874
		69	9.23996	9.3535	9.74245	5.27088	5.23927	5.76472	9.30733	10.0593	8.6734	6.75953	6.41568	6.22996
		72	9.76158	10.0789	10.2979	5.43828	5.58938	5.99187	9.68263	10.5077	9.06803	7.17333	6.75019	6.55497
		75	10.2276	10.4981	10.7387	5.76201	5.86932	6.27024	10.005	10.9557	9.55887	7.6275	7.1867	6.9497
		78	10.6955	11.1546	11.2519	6.02105	6.05487	6.49243	10.276	11.4183	9.97288	8.02058	7.53132	7.30509
		81	11.1287	11.6982	11.6069	6.25915	6.30706	6.68967	10.5305	11.8302	10.4088	8.46802	7.91301	7.65546
		84	11.5451	12.2637	11.9969	6.55574	6.58436	6.96588	10.6991	12.1246	10.7945	8.82631	8.22343	7.98389
		87	12.0032	12.857	12.2614	6.80389	6.84918	7.18681	10.9258	12.4947	11.2175	9.22565	8.55963	8.35051

## Sheet: Fig 6 d
		Fig. 6d
		Time (Hours)	EV - NTC			EV - SLC6A14/SLC25A15-siRNAs			EGFPN1-SLC6A14 - SLC6A14/SLC25A15-siRNAs
		0	1	1	1	1	1	1	1	1	1
		3	0	1.10939	1.13515	1.10253	1.11809	1.14319	1.1052	1.14692	1.12382
		6	1.18218	1.2039	1.24348	1.2092	1.21946	1.25267	1.21352	1.24496	1.24593
		9	1.30649	1.33745	1.38913	1.28275	1.32764	1.38266	1.30281	1.37448	1.37237
		12	1.42525	1.40814	1.49366	1.36819	1.39702	1.4706	1.40482	1.45723	1.47276
		15	1.49874	1.47022	1.59249	1.46196	1.47402	1.52305	1.45683	1.52129	1.54464
		18	1.63952	1.5778	1.48612	1.5619	1.59181	1.63515	1.57419	1.6593	1.67973
		21	1.74154	1.74329	1.88754	1.68731	1.69704	1.80026	1.7029	1.81946	1.87398
		24	1.95513	1.8889	2.07286	1.82866	1.87418	1.97663	1.8807	2.00801	2.07977
		27	2.15711	2.08918	2.29537	1.99924	2.05652	2.17675	2.07026	2.23128	2.28707
		30	2.32593	2.32614	2.52489	2.112	2.22133	2.39298	2.22656	2.45209	2.50221
		33	2.62182	2.58572	2.80203	2.35336	2.37703	2.52744	2.46732	2.6802	2.78363
		36	3.00614	2.88897	3.13471	2.49695	2.55384	2.81222	2.68533	2.93291	3.12571
		39	3.49797	3.32604	3.6458	2.71875	2.90408	3.10416	3.04342	3.32326	3.55224
		42	3.94231	3.76109	4.1653	2.98066	3.1402	3.35746	3.34149	3.5152	3.88475
		45	4.40686	4.27044	4.70844	3.19516	3.4302	3.56337	3.71157	4.02327	4.24702
		48	5.01918	4.82436	5.34392	3.44701	3.6323	3.87709	3.88727	4.42352	4.52035
		51	5.6586	5.36052	5.98791	3.73512	3.90277	4.16612	4.2009	4.72787	4.82782
		54	6.29654	6.04591	6.607	4.00514	4.20857	4.43039	4.57052	5.00768	5.1994
		57	6.88927	6.63341	7.25512	4.212	4.38425	4.71235	4.96731	5.23846	5.45698
		60	7.4893	7.26828	7.90863	4.52481	4.63315	4.97923	5.33379	5.56255	5.80326
		63	8.12635	7.98339	8.57751	4.81469	4.92456	5.30241	5.70566	5.89052	6.09616
		66	8.67468	8.617	9.20662	5.0257	5.13637	5.53382	5.97183	6.25196	6.3975
		69	9.23996	9.3535	9.74245	5.27088	5.23927	5.76472	6.27428	6.48853	6.67142
		72	9.76158	10.0789	10.2979	5.43828	5.58938	5.99187	6.71952	6.8094	7.04122
		75	10.2276	10.4981	10.7387	5.76201	5.86932	6.27024	7.07533	7.1076	7.27911
		78	10.6955	11.1546	11.2519	6.02105	6.05487	6.49243	7.41223	7.3913	7.59291
		81	11.1287	11.6982	11.6069	6.25915	6.30706	6.68967	7.74202	7.68731	7.91223
		84	11.5451	12.2637	11.9969	6.55574	6.58436	6.96588	8.16545	8.07311	8.30221
		87	12.0032	12.857	12.2614	6.80389	6.84918	7.18681	8.56336	8.39577	8.63245

## Sheet: Fig 6 e
		Fig. 6e
		Time (Hours)	EV - NTC			EV - SLC6A14/SLC12A4-siRNAs			EGFPN1-SLC12A4 - NTC			EGFPN1-SLC12A4 - SLC6A14/SLC12A4-siRNAs
		0	1	1	1	1	1	1	1	1	1	1	1	1
		3	0	1.10939	1.13515	1.10279	1.13613	1.08495	1.16035	1.15503	1.14881	1.12399	1.12532	1.15095
		6	1.18218	1.2039	1.24348	1.19806	1.19291	1.17535	1.24367	1.27217	1.26948	1.2208	1.22097	1.2722
		9	1.30649	1.33745	1.38913	1.2892	1.27102	1.26414	1.37638	1.37366	1.36657	1.33845	1.31885	1.34566
		12	1.42525	1.40814	1.49366	1.32303	1.36234	1.3405	1.44295	1.44993	1.41695	1.40547	1.41356	1.41566
		15	1.49874	1.47022	1.59249	1.35662	1.40711	1.41892	1.52999	1.51606	1.46529	1.47404	1.47712	1.47874
		18	1.63952	1.5778	1.48612	1.43342	1.56161	1.5515	1.66158	1.6168	1.58269	1.56845	1.55726	1.54483
		21	1.74154	1.74329	1.88754	1.53673	1.62637	1.63171	1.84669	1.7908	1.77937	1.72962	1.70474	1.69004
		24	1.95513	1.8889	2.07286	1.62683	1.73459	1.76924	2.03616	1.98973	1.97917	1.93102	1.80427	1.85298
		27	2.15711	2.08918	2.29537	1.72964	1.84665	1.9015	2.29044	2.19921	2.15217	2.04537	1.99206	1.99233
		30	2.32593	2.32614	2.52489	1.81859	1.95496	1.96071	2.45968	2.3643	2.36269	2.27423	2.08127	2.09942
		33	2.62182	2.58572	2.80203	1.8852	2.11219	2.15076	2.75214	2.67356	2.6591	2.48832	2.26751	2.29173
		36	3.00614	2.88897	3.13471	2.03672	2.27968	2.2941	3.11003	2.95613	2.96705	2.69451	2.42096	2.41839
		39	3.49797	3.32604	3.6458	2.31828	2.48949	2.54949	3.52527	3.35753	3.36171	2.94008	2.64299	2.62466
		42	3.94231	3.76109	4.1653	2.43071	2.64804	2.70018	3.92124	3.84495	3.71669	3.1331	2.79641	2.82268
		45	4.40686	4.27044	4.70844	2.59951	2.79325	2.93873	4.42833	4.31785	4.20881	3.42133	3.06912	3.07118
		48	5.01918	4.82436	5.34392	2.72708	3.00886	3.17086	4.88117	4.78382	4.62528	3.63289	3.25854	3.24754
		51	5.6586	5.36052	5.98791	2.92389	3.21062	3.39593	5.55415	5.29596	5.11081	3.88359	3.4973	3.4313
		54	6.29654	6.04591	6.607	3.03446	3.7129	3.65993	5.99852	5.75118	5.50563	4.07971	3.64361	3.59171
		57	6.88927	6.63341	7.25512	3.29017	3.96042	3.97519	6.59874	6.17627	6.07792	4.31262	3.88632	3.83099
		60	7.4893	7.26828	7.90863	3.42917	4.2154	4.20629	7.10962	6.82401	6.46908	4.51927	4.04157	3.97399
		63	8.12635	7.98339	8.57751	3.68443	4.54607	4.48609	7.65713	7.31666	6.92955	4.68448	4.21213	4.15599
		66	8.67468	8.617	9.20662	3.93804	4.69918	4.76622	8.13516	7.76932	7.30949	4.89691	4.37432	4.28817
		69	9.23996	9.3535	9.74245	4.1549	5.17566	5.20717	8.65506	8.29207	7.7845	5.04454	4.51936	4.54516
		72	9.76158	10.0789	10.2979	4.42877	5.53602	5.65315	9.08617	8.66909	8.17781	5.29982	4.76083	4.66881
		75	10.2276	10.4981	10.7387	4.62559	5.87473	5.98582	9.55839	9.17695	8.58796	5.50922	4.87484	4.85568
		78	10.6955	11.1546	11.2519	5.04198	6.36102	6.44795	9.83385	9.4518	8.88616	5.63547	5.03015	5.02792
		81	11.1287	11.6982	11.6069	5.372	6.63333	6.85693	10.2738	9.89617	9.26612	5.6811	5.25252	5.19036
		84	11.5451	12.2637	11.9969	5.71879	6.19197	7.40346	10.5494	10.1757	9.61293	5.9391	5.33148	5.30957
		87	12.0032	12.857	12.2614	6.15122	8.14893	7.98512	10.9257	10.5281	9.99246	6.00972	5.56989	5.52256

## Sheet: Fig 6 f
		Fig. 6f
		Time (Hours)	EV - NTC			EV - SLC6A14/SLC12A4-siRNAs			EGFPN1-SLC6A14 - SLC6A14/SLC12A4-siRNAs
		0	1	1	1	1	1	1	1	1	1
		3	0	1.10939	1.13515	1.10279	1.13613	1.08495	1.16655	1.11885	1.09562
		6	1.18218	1.2039	1.24348	1.19806	1.19291	1.17535	1.30655	1.22403	1.25403
		9	1.30649	1.33745	1.38913	1.2892	1.27102	1.26414	1.4242	1.33539	1.36761
		12	1.42525	1.40814	1.49366	1.32303	1.36234	1.3405	1.4732	1.43767	1.44925
		15	1.49874	1.47022	1.59249	1.35662	1.40711	1.41892	1.6032	1.52459	1.53034
		18	1.63952	1.5778	1.48612	1.43342	1.56161	1.5515	1.74302	1.66672	1.67193
		21	1.74154	1.74329	1.88754	1.53673	1.62637	1.63171	1.87117	1.77257	1.78796
		24	1.95513	1.8889	2.07286	1.62683	1.73459	1.76924	2.04723	1.94876	1.99706
		27	2.15711	2.08918	2.29537	1.72964	1.84665	1.9015	2.17714	2.10879	2.17422
		30	2.32593	2.32614	2.52489	1.81859	1.95496	1.96071	2.32959	2.21415	2.36498
		33	2.62182	2.58572	2.80203	1.8852	2.11219	2.15076	2.51257	2.43009	2.58759
		36	3.00614	2.88897	3.13471	2.03672	2.27968	2.2941	2.77734	2.6368	2.804
		39	3.49797	3.32604	3.6458	2.31828	2.48949	2.54949	3.11589	2.99117	3.10662
		42	3.94231	3.76109	4.1653	2.43071	2.64804	2.70018	3.33237	3.22327	3.36827
		45	4.40686	4.27044	4.70844	2.59951	2.79325	2.93873	3.57833	3.48385	3.70524
		48	5.01918	4.82436	5.34392	2.72708	3.00886	3.17086	3.91953	3.7291	4.00811
		51	5.6586	5.36052	5.98791	2.92389	3.21062	3.39593	4.24312	4.01065	4.28067
		54	6.29654	6.04591	6.607	3.03446	3.7129	3.65993	4.62683	4.33216	4.70861
		57	6.88927	6.63341	7.25512	3.29017	3.96042	3.97519	4.99728	4.65971	4.8959
		60	7.4893	7.26828	7.90863	3.42917	4.2154	4.20629	5.31749	4.96578	5.29003
		63	8.12635	7.98339	8.57751	3.68443	4.54607	4.48609	5.78779	5.32809	5.96283
		66	8.67468	8.617	9.20662	3.93804	4.69918	4.76622	6.2733	5.76058	5.94448
		69	9.23996	9.3535	9.74245	4.1549	5.17566	5.20717	6.79414	6.2855	6.64515
		72	9.76158	10.0789	10.2979	4.42877	5.53602	5.65315	7.43438	6.83379	7.47925
		75	10.2276	10.4981	10.7387	4.62559	5.87473	5.98582	8.09852	7.3673	7.97132
		78	10.6955	11.1546	11.2519	5.04198	6.36102	6.44795	8.72813	7.91236	8.50422
		81	11.1287	11.6982	11.6069	5.372	6.63333	6.85693	9.49873	8.52669	9.04476
		84	11.5451	12.2637	11.9969	5.71879	6.19197	7.40346	10.1242	9.11144	9.54437
		87	12.0032	12.857	12.2614	6.15122	8.14893	7.98512	11.0059	9.7784	9.97126

## Sheet: Fig 6 g
		Fig. 6g
		Time (Hr)	HCT116 NTC CRISPR - NTC-siRNA			HCT116 NTC CRISPR - SLC6A14/SLC25A15-siRNA			HCT116 PHGDH KO - NTC-siRNA			HCT116 PHGDH KO - SLC6A14/SLC25A15-siRNA			HCT116 NTC CRISPR - SLC6A14/SLC12A4-siRNA			HCT116 PHGDH KO - SLC6A14/SLC12A4-siRNA
		0	0.666667	0.666667	0.333333	0.333333	1.33333	0.666667	1.33333	0	0	4	3.66667	1	1.33333	0.333333	0	2.33333	0	0
		3	3.66667	1.66667	5	7	4.33333	4.66667	4	2	3.33333	10.6667	13.6667	8	5.66667	3	1.66667	10	15.3333	10
		6	5.66667	2	5.66667	17	16.3333	12.6667	8	7.33333	9.33333	25.3333	28.3333	17.3333	18.3333	15.3333	11	21.3333	23	20.6667
		9	6.66667	6.33333	7	25	27.6667	24.6667	10	6.66667	7	37.6667	37.6667	32.3333	34	20.3333	19.6667	29	34.3333	27.6667
		12	5.66667	7.66667	7.66667	40	40.3333	35	10.3333	9.33333	9.66667	55	53.6667	53	45	29	30	43.3333	46.6667	42.6667
		15	5.66667	9.66667	5.33333	61.3333	58.6667	52.3333	14.6667	16	13.3333	87	100.333	86	56	39.3333	43.6667	67	67.6667	66.6667
		18	6	8.66667	7.66667	90.3333	93.3333	73	17.6667	16.3333	17.3333	135	167	156	62.6667	63	69.3333	96.3333	95	102.333
		21	11	11.6667	11	138.333	159.667	127	24	22.6667	28	189.333	252.333	244.333	91.6667	102.667	99.6667	135.667	136.333	153.667
		24	14.6667	17.3333	13.6667	229.333	271	207	31.3333	33.3333	39.3333	306.667	393.667	390.333	131	155.333	131.667	214.333	208.333	251
		27	24	24.6667	20	349.333	417.333	330	55.6667	57.3333	56.3333	538	642	642.667	178	240	194.667	340.333	307.667	373.667
		30	30.3333	28	27.6667	550	632.333	521	73	69	76.6667	830	903	905	266.667	349.667	286.333	495	482.667	500.667
		33	43.6667	38.3333	37.3333	748.333	857.333	752	83	88	91.6667	1135.33	1243	1180	376.667	504.333	411.667	730.333	687.333	697.333
		36	55.3333	54	55.3333	955.333	1023	952.667	98.6667	114.333	105.667	1453.33	1496	1457.33	524.333	657	586.333	980	935.333	927.333
		39	83	76	75.6667	1133.33	1225	1109.67	134.333	144.333	121.333	1719.67	1696.67	1612	673.333	840.333	744.667	1216	1166	1117.67
		42	97.3333	84	89	1220	1279.33	1216.67	156	171.667	155.667	1866.33	1818	1718	752.333	956.667	846	1399.67	1316.67	1285
		45	118.333	101	108.667	1195.33	1282.33	1186.33	180.667	214.333	188.667	1896.33	1934	1728.33	792.333	1037.67	908.667	1514	1450.33	1381.67
		48	133.667	122.667	117	1111.67	1190.33	1124.33	221.667	258.333	230	1865.67	1900	1732.67	819	1031.33	894.333	1558.67	1527.67	1436

## Sheet: Fig 6 h
		Fig. 6h
		Parental	NTC1+NTC2	SLC6A14+NTC1	SLC6A14+SLC12A4	SLC6A14+SLC25A15	SLC6A14+SLC38A2
		24.012	22.298	15.799	11.474	11.235	14.477
		24.178	22.396	13.421	11.472	11.517	14.365
		24.219	21.979	14.35	12.643	10.463	14.528

## Sheet: Fig 6 i
		Fig. 6i
		Parental	NTC1+NTC2	SLC6A14+SLC12A4	SLC6A14+SLC38A2	SLC25A15+SLC25A15	SLC6A14+NTC1
		31.386	33.982	23.945	24.614	24.068	31.422
		21.334	34.268	23.491	22.956	23.324	30.929
		37.176	34.637	24.687	23.283	25.065	28.742

## Sheet: Fig 6 j
		Fig. 6j
		Time (min)	Parental			NTC 1 + NTC 2			SLC6A14 + SLC12A4			SLC6A14 + SLC38A2			SLC6A14 + SLC25A15
		0	0	0	0	0	0	0	0	0	0	0	0	0	0	0	0
		1	1.83763e+06	1.66323e+06	1.3468e+06	2.07375e+06	1.82929e+06	1.87461e+06	522202	674927	715017	845950	860599	904659	591283	671284	426741
		3	3.98362e+06	4.23301e+06	4.30885e+06	4.24369e+06	4.71208e+06	5.2148e+06	1.42033e+06	1.6667e+06	1.75433e+06	1.18269e+06	1.39315e+06	1.46989e+06	831301	772288	799462
		6	3.98196e+06	4.58255e+06	4.47079e+06	4.26944e+06	3.96085e+06	3.57548e+06	1.29686e+06	1.46342e+06	2.54252e+06	1.44861e+06	1.48438e+06	1.12414e+06	819788	1.08766e+06	1.13818e+06
		AUC	Parental			NTC 1 + NTC 2			SLC6A14 + SLC12A4			SLC6A14 + SLC38A2			SLC6A14 + SLC25A15
			Mean	SEM	N	Mean	SEM	N	Mean	SEM	N	Mean	SEM	N	Mean	SEM	N
			19379391	633285	9	20600512	1029410	9	7641926	1067404	9	6705616	402065	9	4370008	296896	9
