# Supplementary material for: Phenotypic profiling of solute carriers characterizes serine transport in cancer
Source: Nat Metab. 2023 Dec 8;5(12):2148–68. doi: 10.1038/s42255-023-00936-2 (PMC10730406; doi:10.1038/s42255-023-00936-2)
Supplement: Supplementary file 9 — Statistical source data related to Fig. 7. [file 42255_2023_936_MOESM9_ESM.xlsx]

## Sheet: Fig 7 b
		Fig. 7b
		Time (hours)	NTC_NoDOX				NTC+DOX_GFPneg			NTC+DOX_GFPpos			SLC6A14/12A4_NoDOX			SLC6A14/12A4+DOX_GFPneg				SLC6A14/12A4+DOX_GFPpos			SLC6A14/25A15_A_NoDOX			SLC6A14/25A15_A+DOX_GFPneg				SLC6A14/25A15_A+DOX_GFPpos				SLC6A14/25A15_B_NoDOX		SLC6A14/25A15_B+DOX_GFPneg				SLC6A14/25A15_B+DOX_GFPpos
		0	0.953721	1.09543	0.957404	0.993445	0.964292	1.06363	0.827517	0.972552	1.02409	1.05048	1.02961	1.11122	1.26388	0.940227	1.03776	1.08859	0.933424	1.0066	0.955454	1.02193	0.919327	1.14136	1.00836	1.01574	1.03035	1.0978	0.856105	1.00153	1.18249	1.09872	0.717262	1.10346	1.13525	1.00586	0.987362	1.0397	0.967079	1.04429	1.10748	1.06414	0.784089
		24	1.75092	2.18789	1.70451	1.85906	1.86376	2.35335	1.58391	2.07465	2.14683	1.88681	2.05124	2.11269	2.3503	1.83838	2.10115	2.28821	1.97782	1.91092	1.91009	1.88929	1.59246	2.20372	1.82324	1.83083	1.88945	2.13268	1.64901	1.58225	1.86266	1.77805	1.06031	1.85497	1.98789	1.84254	2.00143	2.09067	1.90976	1.57073	1.84517	1.66956	1.12423
		48	2.81172	3.27377	3.0251	3.10518	2.99216	3.73868	2.68489	2.75339	2.82322	2.59865	3.4886	3.48793	3.99968	3.04441	3.56034	3.77161	3.18955	2.97491	2.91753	2.79412	2.4481	3.19249	2.84749	2.94827	2.94361	3.2091	2.6725	2.10723	2.52611	2.35225	1.35458	3.08665	3.2822	2.81052	3.0437	3.25078	3.06573	2.13409	2.50862	2.25989	1.51887
		72	3.58842	4.36262	4.34629	4.22452	4.1004	4.9781	3.70861	3.72052	3.77982	3.4582	4.67579	5.33947	5.49721	3.84984	4.45302	4.70515	3.91198	3.73652	3.62769	3.23952	3.48152	4.3266	4.37764	3.999	4.15576	4.5446	3.68695	2.53312	3.1228	2.88551	1.56135	4.01966	4.39114	4.02253	4.46156	4.83131	4.34636	2.75528	3.2279	2.93186	1.74736
		96	3.69237	4.85534	4.82995	4.58696	4.52047	5.8158	4.2143	4.16173	4.2303	3.74782	5.01034	6.20023	6.04597	4.12339	4.99782	5.15026	4.15841	3.9113	3.84844	3.3375	3.71412	4.99271	4.8287	4.55921	5.03167	5.39426	4.23032	2.63846	3.44555	3.10683	1.58832	4.27044	4.73147	4.62576	5.42734	5.9767	4.95767	2.93345	3.74799	3.29128	1.71883

## Sheet: Fig 7d_e_f_g
	Fig. 7d
	Time (Weeks)	HCT116 PHGDH KO_NTC_NoDOX									HCT116 PHGDH KO_NTC_+DOX
		YX1.44j	YX1.44g	YX1.44b	YX1.44o	YX1.44i	YX1.44a	YX1.44c	YX1.44s	YX1.44t	YX1.44e	YX1.44p	YX1.44r	YX1.44k	YX1.44f	YX1.44q	YX1.44h	YX1.44m	YX1.44v	YX1.44l	YX1.44u
	0	100	100	100	100	100	100	100	100	100	100	100	100	100	100	100	100	100	100	100	100
	1	224.5	136.9	168.8	140.9	140.2	135.9	73.3	113.6	212.4	135.6	149.6	100.3	136.1	84.8	93	122.7	163.9	112.2	89.3	140.3
	2	470.4	242.6	279.8	370.5	158	221.7	163.5	271.5	456.5	349.2	331	174.8	236.3	187	156.7	263.8	243.3	243.8	160.8	302.4
	3		553.9	467.5	670.9	201.8	272.6	302.1	365.5	634.2	625	678.2	405.7	404.3	417.6	311.6	479.5	387.9	255.8	275.3	365.5
	4		875		927.7	317.6	402.2	475.1	650.9	547.4				721.2	542.1	518.3	839.3	514.4	332.3	488.7	401.5
	Fig. 7f
	Time (Weeks)	HCT116 PHGDH KO_SLC6A14/SLC12A4_NoDOX											HCT116 PHGDH KO_SLC6A14/SLC12A4_+DOX
		YX1.43j	YX1.43c	YX1.43n	YX1.43l	YX1.43o	YX1.43p	YX1.43t	YX1.43e	YX1.43h	YX1.43q	YX1.43u	YX1.43w	YX1.43d	YX1.43b	YX1.43k	YX1.43m	YX1.43x	YX1.43a	YX1.43r	YX1.43v	YX1.43f	YX1.43i	YX1.43s
	0	100	100	100	100	100	100	100	100	100	100	100	100	100	100	100	100	100	100	100	100	100	100	100
	1	86.3	169.7	112.7	115.8	90.9	91.5	128.1	136.2	183.8	151.2	145.5	186.6	99.9	115.6	124	107.2	127.2	69.6	87.4	200.1	105.6	91.6	113.4
	2	177.5	421.8	241.5	179	116.4	146.7	255.3	232.5	289.6	259.7	318.8	345.5	153	125.3	224.9	160.2	170.9	78.9	113.8	154.5	146.6	147.8	190
	3	417.1	743.1	575.4	273.5	240.6	237.1	455	536.7	615.7	430.8	553.9	757.3	363.5	166.4	373.9	304.7	433.7	158.1	163.5	146.5	145	266	316.7
	4			709.7	361.8	485	510	828.4	656.4		736.5			727.8	200.1	556.4	486.5	724.1	285.3	186	163.4	279.2	495.9	454.1
	Fig. 7e and g
	Mice	Days on DOX	HCT116 PHGDH KO_NTC_NoDOX	HCT116 PHGDH KO_NTC_+DOX	HCT116 PHGDH KO_SLC6A14/SLC12A4_NoDOX	HCT116 PHGDH KO_SLC6A14/SLC12A4_+DOX
	YX1.44j	12	1
	YX1.44g	21	1
	YX1.44b	19	1
	YX1.44o	23	1
	YX1.44i	80	0
	YX1.44a	30	1
	YX1.44c	35	1
	YX1.44s	37	1
	YX1.44t	80	0
	YX1.44e	18		1
	YX1.44p	19		1
	YX1.44r	19		1
	YX1.44k	21		1
	YX1.44f	25		1
	YX1.44q	28		1
	YX1.44h	26		1
	YX1.44m	34		1
	YX1.44v	58		1
	YX1.44l	30		1
	YX1.44u	47		1
	YX1.43j	16			1
	YX1.43c	16			1
	YX1.43n	21			1
	YX1.43l	80			0
	YX1.43o	40			1
	YX1.43p	42			1
	YX1.43t	28			1
	YX1.43e	26			1
	YX1.43h	17			1
	YX1.43q	21			1
	YX1.43u	19			1
	YX1.43w	19				1
	YX1.43d	23				1
	YX1.43b	70				1
	YX1.43k	45				1
	YX1.43m	28				1
	YX1.43x	37				1
	YX1.43a	42				1
	YX1.43r	59				1
	YX1.43v	80				0
	YX1.43f	61				1
	YX1.43i	33				1
	YX1.43s	37				1

## Sheet: Fig 7 h
		Fig. 7h
		Tumour +DOX				Tumour -DOX
		NTC	SLC6A14/12A4 gRNAs	SLC6A14/25A15 gRNAs		NTC	SLC6A14/12A4 gRNAs	SLC6A14/25A15 gRNAs
		0.0769083	0.0519841	0.0496929		0.0779015	0.0308652	0.0554272
		0.107071	0.0258007	0.0837729		0.0683464	0.0668812	0.110559
		0.146844	0.0328689	0.0399295		0.0927833	0.0862135	0.0587865
		0.0896797	0.0739947	0.0561603		0.0734308	0.0621437	0.0539564
		0.0846743	0.0382252	0.0450744		0.0512639	0.061166	0.0516059
		0.0531134	0.0445231	0.0721495		0.0380889	0.0690379	0.0627652

## Sheet: Fig 7 i
	Fig. 7i
	Serum +DOX				Serum -DOX
	NTC	SLC6A14/12A4 gRNAs	SLC6A14/25A15 gRNAs		NTC	SLC6A14/12A4 gRNAs	SLC6A14/25A15 gRNAs
	0.0353405	0.0426648	0.0399255		0.0547219	0.0321859	0.0321859
	0.0320184	0.0282281	0.0353739		0.0265663	0.0251717	0.0251717
	0.0386333	0.0255265	0.0371653		0.0306442	0.0315896	0.0315896
	0.0358652	0.0253937	0.0272444		0.0362357	0.0400777	0.0400777
	0.0283374	0.0499829	0.0325121		0.0247824	0.0275834	0.0275834
	0.0366891	0.0254428	0.0317797		0.0267248	0.0250972	0.0250972

## Sheet: Fig 7 j
		Fig. 7j
		Tumour +DOX				Tumour -DOX
		NTC	SLC6A14/12A4 gRNAs	SLC6A14/25A15 gRNAs		NTC	SLC6A14/12A4 gRNAs	SLC6A14/25A15 gRNAs
		0.0569265	0.041384	0.0293628		0.0664033	0.0353554	0.0537683
		0.0719992	0.0237691	0.0463219		0.0628988	0.0194847	0.0797189
		0.0561484	0.0381641	0.027188		0.0672167	0.0769704	0.0438579
		0.0386432	0.0412307	0.0513313		0.0543829	0.0442313	0.0479523
		0.0612493	0.0250643	0.037278		0.0672659	0.0334232	0.0464322
		0.0461818	0.0435671	0.0292855		0.0463587	0.0579755	0.0572509

## Sheet: Fig 7 k
		Fig. 7k
		Serum +DOX				Serum -DOX
		NTC	SLC6A14/12A4 gRNAs	SLC6A14/25A15 gRNAs		NTC	SLC6A14/12A4 gRNAs	SLC6A14/25A15 gRNAs
		0.00818055	0.0274987	0.0133253		0.00975171	0.0120397	0.0111505
		0.00885385	0.00895273	0.00859737		0.0121184	0.0107418	0.0116847
		0.0111569	0.00937475	0.0164969		0.00895628	0.0100886	0.0210593
		0.00900245	0.00644785	0.00761976		0.0158613	0.0138812	0.00995943
		0.00975593	0.0223272	0.00929737		0.00970737	0.00985582	0.0131229
		0.0102074	0.0248387	0.0070388		0.00788389	0.00829254	0.0322159
