# Supplementary material for: Phenotypic profiling of solute carriers characterizes serine transport in cancer
Source: Nat Metab. 2023 Dec 8;5(12):2148–68. doi: 10.1038/s42255-023-00936-2 (PMC10730406; doi:10.1038/s42255-023-00936-2)
Supplement: Supplementary file 10 — Statistical source data related to Extended Data Fig. 1. [file 42255_2023_936_MOESM10_ESM.xlsx]

## Sheet: ED Fig 1 a
	Extended Data Fig. 1a
	Variable	Category	average	sd	min	max	n
	SLC25A1	Normal Tissue	5.48314	1.76072	-9.966	7.726	359
	SLC25A1	Primary Tumor	6.10344	0.650321	2.443	7.523	380
	SLC25A1	Metastatic	6.214	NA	6.214	6.214	1
	SLC25A15	Normal Tissue	0.698267	1.51598	-9.966	4.363	359
	SLC25A15	Primary Tumor	3.21074	0.727583	0.5666	5.054	380
	SLC25A15	Metastatic	4.569	NA	4.569	4.569	1
	SLC25A28	Normal Tissue	5.72032	1.85922	-9.966	9.646	359
	SLC25A28	Primary Tumor	4.76354	0.508021	2.251	5.891	380
	SLC25A28	Metastatic	4.867	NA	4.867	4.867	1
	SLC38A2	Normal Tissue	5.61847	1.80036	-9.966	7.813	359
	SLC38A2	Primary Tumor	5.18035	0.550881	3.134	7.591	380
	SLC38A2	Metastatic	4.432	NA	4.432	4.432	1
	SLC35G3	Normal Tissue	-9.59807	1.28417	-9.966	-3.171	359
	SLC35G3	Primary Tumor	-9.68406	1.0645	-9.966	-3.626	380
	SLC35G3	Metastatic	-9.966	NA	-9.966	-9.966	1
	SLC6A8	Normal Tissue	5.93245	1.83962	-9.966	8.32	359
	SLC6A8	Primary Tumor	5.04963	1.49204	-1.47	9.152	380
	SLC6A8	Metastatic	5.296	NA	5.296	5.296	1
	SLC25A42	Normal Tissue	2.76892	1.45285	-9.966	4.256	359
	SLC25A42	Primary Tumor	1.43563	0.679351	-1.857	3.691	380
	SLC25A42	Metastatic	1.701	NA	1.701	1.701	1
	SLC25A47	Normal Tissue	-5.62871	2.71726	-9.966	-0.0277	359
	SLC25A47	Primary Tumor	-4.15254	1.96407	-9.966	-0.4521	380
	SLC25A47	Metastatic	-2.932	NA	-2.932	-2.932	1
	SLC25A48	Normal Tissue	-2.99394	4.23832	-9.966	2.93	359
	SLC25A48	Primary Tumor	-0.837151	2.05913	-9.966	4.897	380
	SLC25A48	Metastatic	-5.574	NA	-5.574	-5.574	1
	SLC4A9	Normal Tissue	-4.91644	2.56758	-9.966	-0.3022	359
	SLC4A9	Primary Tumor	-5.14763	2.28403	-9.966	1.46	380
	SLC4A9	Metastatic	-3.626	NA	-3.626	-3.626	1
	SLC26A1	Normal Tissue	0.777496	1.42553	-9.966	2.727	359
	SLC26A1	Primary Tumor	0.46389	0.903329	-3.539	2.625	380
	SLC26A1	Metastatic	1.233	NA	1.233	1.233	1
	SLC12A4	Normal Tissue	4.55943	1.96907	-9.966	6.576	359
	SLC12A4	Primary Tumor	3.25745	0.776026	0.8568	5.117	380
	SLC12A4	Metastatic	2.111	NA	2.111	2.111	1
	SLC1A5	Normal Tissue	4.81636	1.84724	-9.966	7.127	359
	SLC1A5	Primary Tumor	7.22984	0.709051	3.566	10.56	380
	SLC1A5	Metastatic	6.643	NA	6.643	6.643	1
	SLC38A5	Normal Tissue	2.51015	2.0359	-9.966	5.864	359
	SLC38A5	Primary Tumor	5.38256	1.97628	-1.51	8.13	380
	SLC38A5	Metastatic	1.623	NA	1.623	1.623	1
	SLC1A4	Normal Tissue	2.22973	1.4586	-9.966	4.448	359
	SLC1A4	Primary Tumor	3.91549	0.777859	0.6969	5.906	380
	SLC1A4	Metastatic	4.859	NA	4.859	4.859	1
	SLC38A7	Normal Tissue	2.27122	1.38383	-9.966	3.671	359
	SLC38A7	Primary Tumor	2.74327	0.547462	0.7958	4.148	380
	SLC38A7	Metastatic	4.134	NA	4.134	4.134	1
	SLC6A9	Normal Tissue	3.07301	1.67963	-9.966	5.459	359
	SLC6A9	Primary Tumor	2.45276	1.00856	-1.756	4.674	380
	SLC6A9	Metastatic	2.665	NA	2.665	2.665	1
	SLC36A1	Normal Tissue	2.58095	1.71462	-9.966	5.382	359
	SLC36A1	Primary Tumor	2.19963	0.7635	-1.994	4.485	380
	SLC36A1	Metastatic	3.442	NA	3.442	3.442	1
	SLC6A14	Normal Tissue	-5.76305	3.42896	-9.966	3.149	359
	SLC6A14	Primary Tumor	0.68333	2.89966	-9.966	6.395	380
	SLC6A14	Metastatic	-2.932	NA	-2.932	-2.932	1
	SLC38A1	Normal Tissue	4.55472	1.65696	-9.966	6.119	359
	SLC38A1	Primary Tumor	5.1486	0.56873	2.844	6.69	380
	SLC38A1	Metastatic	5.384	NA	5.384	5.384	1
	SLC7A8	Normal Tissue	3.17409	1.69996	-9.966	6.519	359
	SLC7A8	Primary Tumor	4.09736	1.25114	-0.8084	7.372	380
	SLC7A8	Metastatic	2.701	NA	2.701	2.701	1

## Sheet: ED Fig 1 b
	Extended Data Fig. 1b
	Variable	Category	average	sd	min	max	n
	SLC25A1	Normal Tissue	5.97038	0.880649	1.585	9	292
	SLC25A1	Primary Tumor	5.66125	0.697057	2.99	8.378	1092
	SLC25A1	Metastatic	6.01543	0.620986	5.251	6.979	7
	SLC25A15	Normal Tissue	1.30646	0.850774	-0.6643	3.465	292
	SLC25A15	Primary Tumor	2.49951	0.931271	-1.056	5.17	1092
	SLC25A15	Metastatic	3.17271	0.400653	2.757	3.785	7
	SLC25A28	Normal Tissue	5.76284	0.513666	4.202	7.101	292
	SLC25A28	Primary Tumor	5.03679	0.494796	2.989	6.892	1092
	SLC25A28	Metastatic	5.15757	0.351308	4.785	5.738	7
	SLC38A2	Normal Tissue	6.26603	0.591134	3.977	8.022	292
	SLC38A2	Primary Tumor	5.69968	0.877343	2.354	8.691	1092
	SLC38A2	Metastatic	5.90514	1.15944	4.582	7.401	7
	SLC35G3	Normal Tissue	-9.41679	1.52537	-9.966	-2.548	292
	SLC35G3	Primary Tumor	-9.42183	1.38368	-9.966	-3.458	1092
	SLC35G3	Metastatic	-7.58457	2.31814	-9.966	-4.608	7
	SLC6A8	Normal Tissue	4.32255	0.763237	1.836	7.045	292
	SLC6A8	Primary Tumor	4.34814	1.07813	-0.6193	7.861	1092
	SLC6A8	Metastatic	4.82686	0.982986	3.661	6.488	7
	SLC25A42	Normal Tissue	3.11429	0.480986	1.064	4.329	292
	SLC25A42	Primary Tumor	2.31175	0.701866	-0.1376	4.64	1092
	SLC25A42	Metastatic	3.165	0.79373	1.496	3.876	7
	SLC25A47	Normal Tissue	-6.8927	2.87353	-9.966	2.632	292
	SLC25A47	Primary Tumor	-7.33409	2.61235	-9.966	1.092	1092
	SLC25A47	Metastatic	-5.64929	5.19685	-9.966	4.397	7
	SLC25A48	Normal Tissue	-0.033014	2.17503	-9.966	4.569	292
	SLC25A48	Primary Tumor	-0.168142	3.31055	-9.966	8.847	1092
	SLC25A48	Metastatic	-1.1667	4.19314	-9.966	2.428	7
	SLC4A9	Normal Tissue	-5.67797	2.63991	-9.966	-1.392	292
	SLC4A9	Primary Tumor	-7.4435	2.59501	-9.966	-0.9132	1092
	SLC4A9	Metastatic	-7.45929	2.47261	-9.966	-4.293	7
	SLC26A1	Normal Tissue	1.1532	1.25794	-2.548	4.063	292
	SLC26A1	Primary Tumor	0.648022	1.24437	-5.012	4.415	1092
	SLC26A1	Metastatic	1.37156	0.53198	0.8246	2.414	7
	SLC12A4	Normal Tissue	5.3752	0.591814	2.551	6.6	292
	SLC12A4	Primary Tumor	3.81932	0.732931	0.2522	6.757	1092
	SLC12A4	Metastatic	4.05029	0.717395	3.126	4.974	7
	SLC1A5	Normal Tissue	6.32795	0.606298	1.022	7.76	292
	SLC1A5	Primary Tumor	6.54397	0.819747	3.029	9.035	1092
	SLC1A5	Metastatic	6.29543	0.718767	5.002	7.354	7
	SLC38A5	Normal Tissue	1.69017	0.968728	-1.552	4.264	292
	SLC38A5	Primary Tumor	2.67056	1.44444	-2.245	7.468	1092
	SLC38A5	Metastatic	1.36046	1.33952	-0.7108	3.268	7
	SLC1A4	Normal Tissue	3.01683	1.35844	0.2881	6.637	292
	SLC1A4	Primary Tumor	4.69955	1.13201	0.2642	7.859	1092
	SLC1A4	Metastatic	4.27914	0.769543	3.754	5.959	7
	SLC38A7	Normal Tissue	2.62215	0.503827	0.7407	3.988	292
	SLC38A7	Primary Tumor	2.81736	0.633801	0.2277	4.848	1092
	SLC38A7	Metastatic	2.88829	0.662589	2.135	3.903	7
	SLC6A9	Normal Tissue	2.0035	1.05237	-1.639	5.134	292
	SLC6A9	Primary Tumor	3.15703	1.23485	-0.7834	8.45	1092
	SLC6A9	Metastatic	3.54924	1.80849	0.1257	5.476	7
	SLC36A1	Normal Tissue	1.8129	0.631694	-1.47	3.429	292
	SLC36A1	Primary Tumor	1.86323	0.921138	-1.938	4.286	1092
	SLC36A1	Metastatic	1.56369	0.902437	-0.3752	2.266	7
	SLC6A14	Normal Tissue	-0.787733	4.73174	-9.966	5.166	292
	SLC6A14	Primary Tumor	-1.81683	3.76333	-9.966	8.944	1092
	SLC6A14	Metastatic	-4.0898	3.48	-9.966	-0.1993	7
	SLC38A1	Normal Tissue	3.96885	1.69035	-1.552	7.656	292
	SLC38A1	Primary Tumor	5.59931	1.37022	-2.955	8.689	1092
	SLC38A1	Metastatic	5.22086	1.78897	3.016	8.134	7
	SLC7A8	Normal Tissue	4.81862	0.921204	1.585	7.139	292
	SLC7A8	Primary Tumor	5.18097	1.57953	-0.394	8.216	1092
	SLC7A8	Metastatic	5.178	1.7864	1.59	6.557	7

## Sheet: ED Fig 1 c
	Extended Data Fig. 1c
	SLC Gene siRNA	siRNA_01	siRNA_02	siRNA_03	siRNA_04
	SLC6A14	1.155	0.731	0.582	3.485
	SLC25A15	0.125	0.089	0.302	0.509
	SCL12A4	10.35	1.596	0.296	0.054
	SLC25A1	0.036	0.027	0.068	0.04
	SLC38A2	0.19	0.353	0.421	0.341
	SLC38A7	0.554	0.148	0.395	0.123
	SLC1A4	0.08	0.407	0.382	0.318
	SLC7A8	0.019	0.166	0.012	0.03
	SLC25A28	0.169	0.279	0.332	0.714
	SLC38A1	0.04	0.205	0.369	0.032
	SLC36A1	0.566	1.317	1.295	3.163
	SLC6A9	4.397	2.082	3.109	0.536
	SLC38A5	0.068	0.004	0.003	0.006
	SLC1A5	0.003	0.064	0.026	0.022

## Sheet: ED Fig 1 g
	Extended Data Fig. 1g
	SLC Cell line	HCT116			HCT116 p21-/-
	SLC6A14	1	1	1	3.366	19.425	17.576
	SLC12A4	1	1		0.954	4.793
	SLC25A15	1	1	1	1.847	1.66	5.162
	SLC25A1	1	1	1	1.193	1.869	0.882
	SLC6A9	1	1	1	0.001	0.834	8.821
	SLC7A8	1	1	1	0.019	1.009	0.525
	SLC36A1	1	1	1	0.697	0.104	0.437
	SLC38A1	1	1	1	0.349	0.245	1.181
	SLC38A2	1	1	1	0.303	0.333	1.145
	SLC1A4	1	1	1	0.13	0.2	0.402
	SLC1A5	1	1	1	0.106	0.193	0.165
	SLC25A28	1	1	1	0.164	1.194	0.037
	SLC38A7	1	1	1	0.03	0.146	0.986
	SLC38A5	1	1	1	0.014	0.014	0.475
