# Supplementary material for: Phenotypic profiling of solute carriers characterizes serine transport in cancer
Source: Nat Metab. 2023 Dec 8;5(12):2148–68. doi: 10.1038/s42255-023-00936-2 (PMC10730406; doi:10.1038/s42255-023-00936-2)
Supplement: Supplementary file 11 — Statistical source data related to Extended Data Fig. 2. [file 42255_2023_936_MOESM11_ESM.xlsx]

## Sheet: ED Fig 2 a
		Extended Data Fig. 2a
		PHGDH
		NTC	CRISPR-1
		1	0.00976982
		1	0.0490667
		1	0.0109922
		PSAT1
		NTC	CRISPR-1
		1	1.17583
		1	1.13241
		1	0.826547
		PSPH
		NTC	CRISPR-1
		1	1.18401
		1	1.51149
		1	1.26843

## Sheet: ED Fig 2 b
		Extended Data Fig. 2b
		DLD-1; PHGDH CRISPR
		Time (Hr) Cell Lines	NTC - Plus Ser/Gly			NTC - No Ser/Gly			PHGDH CRISPR-1 - Plus Ser/Gly			PHGDH CRISPR-1 - No Ser/Gly
		0	0.968111	1.0435	0.98839	0.968111	1.0435	0.98839	0.996546	1.01	0.993453	0.996546	1.01	0.993453
		48	4.80046	4.80975	4.91502	3.94659	4.79303	4.73467	3.69715	3.80896	3.95325	1.05531	1.18382	1.07418
		72	9.7582	10.0057	10.1759	7.92957	9.38885	9.60372	11.5398	11.2657	9.86927	1.04835	1.05423	0.934842

## Sheet: ED Fig 2 c
		Extended Data Fig. 2c
		DLD-1; PHGDH CRISPR-1
		Time (Hr) Media	Plus Ser/Gly			No Ser			No Gly			No Ser/Gly			No Ser + FA			No Gly + FA			No Ser/Gly + FA
		0	0.996546	1.01	0.993453	0.996546	1.01	0.993453	0.996546	1.01	0.993453	0.996546	1.01	0.993453	0.996546	1.01	0.993453	0.996546	1.01	0.993453	0.996546	1.01	0.993453
		48	3.69715	3.80896	3.95325	1.28017	1.25558	1.49683	3.4709	3.35167	3.80277	1.05531	1.18382	1.07418	1.8618	1.88932	1.64947	3.21388	3.02629	2.90829	1.17207	1.21645	0.985102
		72	11.5398	11.2657	9.86927	1.3196	1.42244	1.46327	5.36363	6.26429	5.13877	1.04835	1.05423	0.934842	2.51317	2.54549	2.46461	4.54632	4.35471	4.18398	1.28589	1.01526	0.937316

## Sheet: ED Fig 2 d
		Extended Data Fig. 2d
		Cell lines Metabolite	Glucose - 15 min			Glucose M+6 - 15 min			Glucose - 180 min			Glucose M+6 - 180 min
		NTC	364100	147456	469103	7.69481e+06	6.83037e+06	4.2676e+06	2.68755e+06	419139	88086.1	5.01936e+06	3.14608e+06	4.04531e+06
		PHGDH CRISPR-1	33446.1	78719.2	65658.4	5.35791e+06	4.3955e+06	6.21857e+06	14500.7	15989.4	116479	3.8428e+06	3.96168e+06	3.8886e+06
			3PG - 15 min			3PG M+3 - 15 min			3PG - 180 min			3PG M+3 - 180 min
		NTC	2634.08	2180.18	10877.4	31721.3	102310	148274	9237.06	2249.59	5545.73	57351.8	88228.5	100752
		PHGDH CRISPR-1	82182.5	83781.6	61434.6	1.67908e+06	1.51381e+06	1.32874e+06	53946.7	28027.1	58970	1.13384e+06	979172	1.05476e+06
			Serine - 15 min			Serine M+3 - 15 min			Serine - 180 min			Serine M+3 - 180 min
		NTC	5.93863e+06	5.56825e+06	5.17561e+06	50787	43936.8	59946.5	4.65515e+06	4.24868e+06	5.35297e+06	53551.6	69504.5	82201.6
		PHGDH CRISPR-1	10400000	9.7633e+06	10200000	0	0	0	10700000	10300000	10700000	0	0	0

## Sheet: ED Fig 2 e
		Extended Data Fig. 2e
		Cell lines Metabolite	Glucose - 180 min			Glucose M+6 - 180 min
		NTC	4175524	3603205	4253991	1307419	1270055	885939
		PHGDH CRISPR-2	2838950	1813634	2208459	1029881	885364	791216
			3PG - 180 min			3PG M+3 - 180 min
		NTC	21667.6	22631.3	27411.7	756364	837830	1040544
		PHGDH CRISPR-2	22829.3	15207.1	9031.05	59092.8	101780	113129
			Serine - 180 min			Serine M+3 - 180 min
		NTC	19300000	17800000	19000000	1045705	979141	1110799
		PHGDH CRISPR-2	14300000	13800000	12800000	0	0	0

## Sheet: ED Fig 2 f
		Extended Data Fig. 2f
		Cell lines Metabolite	Glucose - 180 min			Glucose M+6 - 180 min
		Parental	17000000	12600000	11800000	17000000	12600000	11800000
		NTC	7.83384e+06	7.27029e+06	7.62419e+06	7.83384e+06	7.27029e+06	7.62419e+06
		PHGDH CRIPSR-1	8.33418e+06	7.60162e+06	9.56818e+06	8.33418e+06	7.60162e+06	9.56818e+06
			3PG - 180 min			3PG M+3 - 180 min
		Parental	350047	355609	469563	9816676	11000000	12200000
		NTC	319078	325723	400485	15600000	17600000	14200000
		PHGDH CRIPSR-1	424303	231736	233726	12200000	14800000	15900000
			Serine - 180 min			Serine M+3 - 180 min
		Parental	6245589	3746041	5230219	388000	432028	433554
		NTC	4707869	3895161	6178222	391670	537316	548415
		PHGDH CRIPSR-1	6678054	6601621	4536725	23079.8	1156.91	0

## Sheet: ED Fig 2 g
		Extended Data Fig. 2g
		SLC Cell line	NTC		PHGDH CRISPR-1
		SLC25A15	1	1	43.9411	19.0934
		SLC12A4	1	1	34.8197	11.4505
		SLC38A5	1	1	17.7819	5.73185
		SLC6A14	1	1	6.92109	7.06163
		SLC25A1	1	1	7.75342	1.55384
		SLC6A9	1	1	2.03003	2.06718
		SLC25A28	1	1	1.4823	2.37869
		SLC36A1	1	1	2.44274	1.21139
		SLC37A4	1	1	1.20428	2.31044
		SLC38A2	1	1	1.27618	2.03214
		SLC7A8	1	1	0.740292	1.76276
		SLC1A4	1	1	1.01736	1.4165
		SLC1A5	1	1	0.769059	0.949123
		SLC38A1	1	1	0.981346	0.533848
		SLC38A7	1	1	0.140389	0.806828
		PHGDH	1	1	0.001896	0.003617

## Sheet: ED Fig 2 h
		Extended Data Fig. 2h
		SLCsiRNA Cell line	NTC			PHGDH CRISPR-1
		No SG	0.584187	0.643563	0.589446	0.255869	0.254596	0.253451
		SCL12A4	0.715525	0.824131	0.753576	0.740441	0.738469	0.788663
		SLC1A5	1.06975	1.11455	1.05745	0.907055	1.02481	1.03887
		NTC	1.11041	1.06577	1.17073	1.00344	1.0418	0.954768
		SLC38A7	1.17765	1.07728	1.06623	1.03054	1.00732	1.01597
		SLC6A14	0.863839	0.898329	0.939776	1.05853	0.975889	1.04892
		SLC36A1	1.11107	1.11542	1.08221	1.08188	1.03391	0.995738
		SLC25A28	0.946566	0.967476	0.949092	1.08105	1.03543	1.02697
		SLC25A15	1.00934	0.955096	0.968801	1.01266	1.14498	1.05681
		SLC38A5	1.18572	1.13575	1.103	1.05446	1.08531	1.10357
		SLC1A4	1.10718	1.1873	1.2393	1.06425	1.02729	1.15446
		SLC6A9	0.937747	1.09322	1.15943	1.06953	1.08836	1.09167
		SLC38A2	0.984245	0.958119	0.957332	1.14397	1.05827	1.05974
		SLC25A1	1.07041	1.09583	1.02346	1.15154	1.10427	1.10281
		SLC7A8	1.17454	1.17504	1.10254	1.23729	1.09733	1.17762
		SLC38A1	0.989876	1.16423	1.21723	1.14498	1.16566	1.25949
