# Supplementary material for: Phenotypic profiling of solute carriers characterizes serine transport in cancer
Source: Nat Metab. 2023 Dec 8;5(12):2148–68. doi: 10.1038/s42255-023-00936-2 (PMC10730406; doi:10.1038/s42255-023-00936-2)
Supplement: Supplementary file 12 — Statistical source data related to Extended Data Fig. 3. [file 42255_2023_936_MOESM12_ESM.xlsx]

## Sheet: ED Fig 3 d
		Extended Data Fig. 3d		SLC38A2 siRNA
		Time (min)	Parental			NTC			SLC38A2 - siRNA
		0	0	0	0	0	0	0	0	0	0
		1	1410000	1250000	1860000	1810000	1610000	1640000	1600000	1350000	1330000
		3	4060000	3750000	4120000	3860000	3490000	3330000	3580000	3500000	3350000
		6	4670000	4880000	6100000	3960000	4640000	4630000	3490000	3360000	3180000

## Sheet: ED Fig 3 e
		Extended Data Fig. 3e		SLC38A5 siRNA
		Time (min)	Parental			NTC			SLC38A5 - siRNA
		0	0	0	0	0	0	0	0	0	0
		1	1.60702e+06	1.4398e+06	1.51307e+06	1.66811e+06	1.37739e+06	1.59676e+06	1.6191e+06	1.54328e+06	1.54844e+06
		3	4.84316e+06	5.11279e+06	5.66861e+06	4.9543e+06	4.02381e+06	4.66338e+06	3.91899e+06	3.67303e+06	4.57678e+06
		6	5.2158e+06	6.4055e+06	4.77286e+06	4.71535e+06	4.64683e+06	5.33323e+06	4.13375e+06	4.35917e+06	4.31356e+06

## Sheet: ED Fig 3 f
		Extended Data Fig. 3f		SLC1A5 siRNA
		Time (min)	Parental			NTC			SLC1A5 - siRNA
		0	0	0	0	0	0	0	0	0	0
		1	810000	960000	1200000	753000	867000	1400000
		3	4680000	4030000	3700000	3210000	3170000	2940000	3610000	3670000	3550000
		6	5250000	6070000	6370000	6170000	5050000	5140000	6.5879e+06	5.81107e+06	6.54081e+06

## Sheet: ED Fig 3 g
		Extended Data Fig. 3g
		Time (min)	EV-FLAG			SLC6A14-FLAG
		0	0	0	0	0	0	0
		1	891965	1.07014e+06	954685	394774	1.09731e+06	1.04238e+06
		3	1.9274e+06	2.00102e+06	1.70496e+06	2.43753e+06	1.73159e+06	2.67639e+06
		6	2.52828e+06	1.89398e+06	3.29974e+06	3.53892e+06	3.85931e+06	3.07812e+06

## Sheet: ED Fig 3 h
		Extended Data Fig. 3h
		Time (min)	EV - EGFPN1			SLC38A2--EGFPN1
		0	0	0	0	0	0	0
		1	450425	525096	472403	711586	518233	421751
		3	672321	993878	456148	874632	1.04064e+06	1.13749e+06
		6	1.35397e+06	1.48526e+06	1.00995e+06	2.10113e+06	2.28896e+06	1.70446e+06
		Time (min)	EV - FLAG			SLC38A2--FLAG
		0	0	0	0	0	0	0
		1	581026	366003	742285	2.38871e+06	2.71362e+06	2.52229e+06
		3	2.13222e+06	1.23004e+06	1.5577e+06	4.20445e+06	4.54942e+06	3.66857e+06
		6	1.18023e+06	1.62844e+06	1.22414e+06	4.71779e+06	4.54375e+06	3.35469e+06

## Sheet: ED Fig. 3 j
		Extended Data Fig. 3j
		Amino Acids	SLC6A14_siRNA-1	SLC6A14_siRNA-2	SLC12A4_siRNA	SLC25A15_siRNA
		Cysteine	0.4441	0.9999	0.9999	0.9958
		Proline	0.0655	0.983	0.0723	0.9991
		Glutamate	0.0107	0.0476	0.08	0.5118
		Aspartate	0.0014	0.0228	0.0047	0.0074
		Methionine	0.048	0.1291	0.0247	0.0759
		Tryptophan	0.0002	0.0053	0.0004	0.0018
		Phenylalanine	0.004	0.0268	0.0044	0.0161
		Tyrosine	0.0008	0.1887	0.0062	0.0491
		Threonine	0.0024	0.0853	0.0017	0.0281
		Lysine	0.0049	0.0342	0.0013	0.0771
		Isoleucine	0.0033	0.0603	0.0011	0.0127
		Alanine	0.0067	0.2336	0.0024	0.1929
		Glycine	0.1273	0.5651	0.0138	0.4546
		Valine	0.0106	0.3445	0.0131	0.1778
		Leucine	0.0011	0.0342	0.0004	0.0032
		Serine	0.001	0.0311	0.0006	0.0039

## Sheet: ED Fig. 3 k
	Extended Data Fig. 3k
	L-Serine [13C3;15N] (nmol per cell)			Glycine [13C2;15N] (nmol per cell)
	NTC	SLC25A15siRNA		NTC	SLC25A15siRNA
	1.02594e-06	8.36806e-07		2.64137e-06	3.42107e-06
	1.06166e-06	1.11505e-06		4.78826e-06	4.83155e-06
	9.66593e-07	9.45521e-07		4.42692e-06	2.42418e-06

## Sheet: ED Fig. 3 l
	Extended Data Fig. 3l
	L-Serine [13C3;15N] (nmol per cell)			Glycine [13C2;15N] (nmol per cell)
	EV-FLAG	SLC25A15-FLAG		EV-FLAG	SLC25A15-FLAG
	2.35455e-06	2.65012e-06		5.03227e-06	5.98153e-06
	2.47801e-06	2.57302e-06		4.85048e-06	5.26486e-06
	2.03909e-06	2.77211e-06		4.75482e-06	6.90622e-06

## Sheet: ED Fig. 3 m
		Extended Data Fig. 3m
		EV-FLAG	SLC25A15-FLAG
		67802.1	247043
		116660	142452
		89721.3	227226
