# Supplementary material for: Phenotypic profiling of solute carriers characterizes serine transport in cancer
Source: Nat Metab. 2023 Dec 8;5(12):2148–68. doi: 10.1038/s42255-023-00936-2 (PMC10730406; doi:10.1038/s42255-023-00936-2)
Supplement: Supplementary file 13 — Statistical source data related to Extended Data Fig. 4. [file 42255_2023_936_MOESM13_ESM.xlsx]

## Sheet: ED Fig. 4 a
		Extended Data Fig. 4a
			[13C3,15N]L-Serine
		Time (min)	NTC			SLC6A14si
		0	0	0	0	0	0	0
		1	1.21147e+06	1.29318e+06	1.38379e+06	632825	829502	655704
		3	2.09885e+06	2.15035e+06	2.17353e+06	969553	925320	1.06811e+06
		6	4.22719e+06	4.15737e+06	4.4042e+06	1.92606e+06	2.26094e+06	2.21708e+06
			[13C5,15N]L-Methionine
		Time (min)	NTC			SLC6A14si
		0	0	0	0	0	0	0
		1	58100000	51200000	55400000	33500000	43200000	41700000
		3	107000000	91800000	91000000	42400000	38800000	41700000
		6	148000000	128000000	142000000	59700000	80500000	92200000
			[13C11,15N2]L-Tryptophan
		Time (min)	NTC			SLC6A14si
		0	0	0	0	0	0	0
		1	52700000	54700000	54800000	33200000	44200000	37100000
		3	68900000	67700000	74900000	35300000	34900000	35900000
		6	83900000	87100000	94100000	47800000	62100000	67600000
			[13C9,15N]L-Phenylalanine
		Time (min)	NTC			SLC6A14si
		0	0	0	0	0	0	0
		1	71000000	68700000	64900000	45600000	53800000	47200000
		3	84100000	80600000	81100000	44600000	40300000	45300000
		6	103000000	109000000	108000000	58300000	70100000	80400000
			[13C6,15N]L-Leucine or [13C6,15N]L-Isoleucine
		Time (min)	NTC			SLC6A14si
		0	0	0	0	0	0	0
		1	101000000	104000000	103000000	72000000	87400000	80400000
		3	137000000	135000000	149000000	81200000	81200000	83000000
		6	171000000	184000000	194000000	113000000	142000000	155000000
			[13C5,15N]L-Valine
		Time (min)	NTC			SLC6A14si
		0	0	0	0	0	0	0
		1	12600000	11700000	12400000	11300000	11800000	11800000
		3	18900000	19300000	22300000	12100000	14200000	13600000
		6	39500000	38900000	39800000	25300000	26900000	38100000
			[13C5,15N]L-Glutamate
		Time (min)	NTC			SLC6A14si
		0	0	0	0	0	0	0
		1	2.3764e+06	2.0662e+06	2.63332e+06	3.8585e+06	2.753e+06	3.17017e+06
		3	1.63017e+06	1.62433e+06	2.67225e+06	2.26413e+06	2.51291e+06	2.77502e+06
		6	4.00268e+06	3.82467e+06	4.8857e+06	3.40462e+06	3.98848e+06	7.87523e+06
			[13C4,15N]L-Aspartate
		Time (min)	NTC			SLC6A14si
		0	0	0	0	0	0	0
		1	1.13408e+06	894787	1.19664e+06	1.52099e+06	1.31344e+06	1.64136e+06
		3	607869	584972	923366	815102	1.0973e+06	1.38658e+06
		6	985740	1.23444e+06	1.58314e+06	1.36827e+06	1.28098e+06	3.28686e+06

## Sheet: ED Fig. 4 c
		Extended Data Fig. 4c
		PHGDH
		NTC	SLC6A14 CRISPR-1
		1	1.64863
		1	1.71813
		1	1.39169
		PSAT1
		NTC	SLC6A14 CRISPR-1
		1	1.49923
		1	1.7315
		1	1.49749
		PSPH
		NTC	SLC6A14 CRISPR-1
		1	1.64786
		1	1.87232
		1	1.23772

## Sheet: ED Fig. 4 d
		Extended Data Fig. 4d
		Time (hours) Cell line	NTC						SLC6A14 CRISPR-1						NTC No Ser/Gly
		0	0.950797	0.976703	1.05754	1.01014	1.00481	1.08474	1.04971	0.988558	0.952753	0.907741	1.02391	1.07733	0.937557	0.963102	1.04282	0.996075	0.990821	1.06963
		48	3.77085	3.73723	3.87944				2.56534	2.66241	2.97397				3.28951	3.31687	3.15073
		72	4.13519	3.75891	4.73047				3.20278	3.19107	3.82215				3.48119	4.30388	3.53898
		96	4.9932	5.14956	5.73253				2.86008	2.87849	3.30735				4.31874	5.38946	4.42817

## Sheet: ED Fig. 4 f
	Extended Data Fig. 4f
	Time (Hr)	EGFPN1 - SLC6A14						EGFPN1 - SLC6A14 - V128W						EGFPN1 - SLC6A14 - V128E						EGFPN1 - SLC6A14 - V128G
	0	1	1	1	1	1	1	1	1	1	1	1	1	1	1	1	1	1	1	1	1	1	1	1	1
	3	1.07262	1.05111	1.08771	1.1947	1.16236	1.13618	1.09659	1.12506	1.12886	1.16194	1.16758	1.19323	1.05678	1.06704	1.1101	1.15033	1.15025	1.11871	1.10068	1.10758	1.04018	1.16738	1.12191	1.15658
	6	1.21142	1.21082	1.22384	1.38535	1.34368	1.33617	1.2673	1.30229	1.30364	1.29367	1.30115	1.34091	1.19472	1.20458	1.27281	1.28615	1.28306	1.29351	1.25376	1.27172	1.19861	1.33561	1.263	1.32555
	9	1.37059	1.35248	1.38834	1.56791	1.50355	1.51037	1.42723	1.4989	1.50059	1.38976	0.243567	1.48994	1.37007	1.35141	1.44857	1.44267	1.42235	1.3939	1.42831	1.45084	1.33834	1.4872	1.40439	1.49956
	12	1.52022	1.51944	1.58755	1.63008	1.64183	1.59452	1.62748	1.68448	1.71316	1.42105	1.49181	1.58258	1.53074	1.51559	1.62961	1.49713	1.48668	1.45592	1.63814	1.6398	1.46202	1.59811	1.49813	1.59416
	15	1.61146	1.6217	1.72786	1.71577	1.72205	1.74388	1.78168	1.81709	1.85181	1.4881	1.50396	1.70084	1.67288	1.62407	1.75906	1.60553	1.56884	1.51978	1.76597	1.82936	1.55607	1.70328	1.60505	1.72869
	18	1.72579	1.76389	1.91602	1.87817	1.93976	1.99552	1.96592	2.01405	2.05182	1.67802	1.75855	1.9024	1.80997	1.79762	1.92604	1.84279	1.76926	1.7106	1.9225	2.00444	1.67834	1.96495	1.83472	1.95302
	21	1.92784	1.94018	2.21291	2.17287	2.2709	2.32424	2.26216	2.32023	2.37729	1.92937	1.9544	2.24002	2.00461	2.07268	2.15488	2.10646	2.04051	1.94579	2.19202	2.31604	1.93022	2.24444	2.16304	2.30826
	24	2.22224	2.21532	2.56612	2.54985	2.63727	2.7267	2.78322	2.79761	2.93037	2.17446	2.29585	2.57204	2.44292	2.41972	2.59561	2.43369	2.29998	2.22566	2.67289	2.85039	2.27211	2.61851	2.43017	2.60795
	27	2.49545	2.46812	3.02998	2.81058	2.91976	2.99992	3.21163	3.24203	3.39746	2.3994	2.4933	2.87079	2.77927	2.78192	2.99991	2.68171	2.51551	2.43059	3.0831	3.32302	2.62064	2.88543	2.65156	2.84469
	30	2.75938	2.70942	3.50651	3.12051	3.28213	3.37477	3.59368	3.55998	3.88795	2.61101	2.61479	3.22868	3.1185	3.1624	3.38413	2.98319	2.74333	2.68108	3.40741	3.65483	2.89249	3.12155	2.91911	3.19552
	33	3.09672	2.99379	4.14981	3.53984	3.69752	3.98691	4.19942	4.41396	4.4588	2.93905	2.90605	3.67014	3.54547	3.66985	3.8757	3.42318	3.14697	3.04624	3.77339	4.14145	3.30696	3.60164	3.34428	3.65378
	36	3.53127	3.39264	4.93243	4.02814	4.26425	4.72407	5.09629	5.19542	5.40105	3.26786	3.1995	4.19546	4.08917	4.37397	4.6112	3.93782	3.59003	3.49973	4.68001	4.76947	4.10899	4.07719	3.83011	4.0823
	39	6.80155	3.76469	5.68921	4.44543	4.68316	5.47787	5.88705	6.20182	6.38089	3.52652	3.58983	4.6112	4.56025	5.0747	5.36586	4.4814	4.01057	3.93152	5.22959	5.22887	4.7779	4.54759	4.28719	4.40326
	42	4.25461	4.11017	6.43309	4.85746	5.12952	6.09451	6.72972	6.88002	7.01514	3.75082	3.84912	5.04957	4.97118	5.69294	6.08047	4.89252	4.40676	4.28483	5.75463	5.67616	5.29647	4.93977	4.65085	4.75635
	45	4.68808	4.4525	7.29547	5.31106	5.54893	6.88562	7.51177	7.68516	7.87701	4.00259	4.08587	5.43689	5.35923	6.35763	6.85836	5.44486	4.82648	4.65014	6.24726	6.03459	5.8235	5.45907	5.08047	5.09824
	48	5.08202	4.96005	8.16729	5.69306	6.00029	7.62621	8.33026	8.55924	8.70913	4.17556	4.13685	5.77049	5.73184	7.07435	7.64222	6.01733	5.33037	4.96449	6.70762	6.41074	6.42104	5.92715	5.46878	5.50284
	51	5.45295	5.35338	8.81048	6.09589	6.48767	8.13247	9.05007	9.32743	9.56229	4.38395	4.46997	6.13904	6.12491	7.69553	8.31738	6.594	5.80091	5.31552	7.14453	6.71201	6.90573	6.38851	5.99981	5.75534
	54	5.7348	5.689	9.39858	6.39655	6.83484	9.06707	9.67387	9.92675	10.1611	4.53097	4.52465	6.43518	6.42634	8.16337	8.83852	7.06479	6.17732	5.57629	7.47025	6.92956	7.25503	6.78745	6.36987	6.06177
	57	6.01533	6.01504	9.88012	6.68326	7.18049	9.68765	10.1662	10.3856	10.7022	4.68338	4.68975	6.69949	6.71379	8.59882	9.21566	7.45581	6.56094	5.8304	7.72939	7.12831	7.49045	7.29197	6.75195	6.24045
	60	6.25827	6.30306	10.2399	6.94174	7.47604	10.2673	10.5419	10.7364	11.151	4.81903	4.94394	6.91552	6.95035	8.93064	9.52626	7.85957	6.96122	6.06421	7.95309	7.29276	7.66176	7.74688	7.10569	6.44126
	63	6.52318	6.61555	10.5518	7.16947	7.73759	10.7882	10.9033	11.0395	11.5508	4.94681	5.09152	7.09927	7.1508	9.22238	9.72824	8.20467	7.27144	6.26913	8.10656	7.45878	7.78571	8.16824	7.50536	6.64598
	66	6.76614	6.86023	10.7661	7.36584	7.9483	11.2759	11.2071	11.2351	11.9111	5.09971	5.21064	7.30459	7.3914	9.42796	9.87453	8.53017	7.56185	6.45316	8.23028	7.59518	7.87334	8.59906	7.81645	6.86398
	69	7.01292	7.09342	10.9246	7.56383	8.12816	11.69	11.471	11.3707	12.1477	5.22415	5.33087	7.45236	7.59297	9.56344	10.0135	8.79553	7.8292	6.60486	8.33486	7.697	7.91781	8.99304	8.12182	7.08035
	72	7.20478	7.28291	11.0243	7.72881	8.25019	12.0174	11.632	11.4532	12.3073	5.30819	5.34396	7.57444	7.75689	9.6458	10.1076	9.01686	8.0766	6.73736	8.41184	7.77068	7.93299	9.31137	8.37946	7.30588
	75	7.38124	7.4506	11.1038	7.87173	8.3973	12.3602	11.7325	11.5035	12.4265	5.39248	5.48857	7.66984	7.90259	9.69672	10.1698	9.21588	8.30353	6.83628	8.4607	7.84634	7.95059	9.62966	8.62724	7.42595
	78	7.53432	7.58109	11.1568	7.96487	8.48425	12.5914	11.8057	11.5362	12.4907	5.47213	5.48397	7.76488	8.0485	9.73382	10.209	9.37065	8.46105	6.9048	8.49025	7.9168	7.95498	9.93828	8.84337	7.62097
	81	7.61735	7.65299	11.1943	8.06265	8.57905	12.8113	11.8428	11.5469	12.5195	5.56096	5.57707	7.81783	8.12598	9.74186	10.2347	9.52598	8.62338	6.97992	8.51458	7.9472	7.95814	10.2187	8.97349	7.70263
	84	7.7548	7.76548	11.2261	8.12064	8.61653	12.971	11.8658	11.5669	12.5587	5.61058	5.58251	7.85682	8.23783	9.74879	10.2651	9.60382	8.72906	7.00814	8.53424	7.97538	7.95975	10.3845	9.06681	7.90049
	87	7.84947	7.82724	11.2539	8.16917	8.68016	13.0942	11.8885	11.5795	12.5808	5.67534	5.65925	7.90698	8.31639	9.75494	10.2941	9.66046	8.80428	7.05573	8.55866	8.00098	7.95973	10.559	9.13208	7.93663

## Sheet: ED Fig. 4 g
	Extended Data Fig. 4g
	Time (Min)	EGFPN1			SLC6A14-WT			SLC6A14-V128E			SLC6A14-V128G			SLC6A14-V128W
	0	0	0	0	0	0	0	0	0	0	0	0	0	0	0	0
	1	54800000	44100000	57400000	80100000	84900000	98800000	40700000	39200000	38400000	56100000	55000000	40900000	40600000	32100000	37400000
	3	45300000	61000000	63700000	84900000	102000000	99300000	68700000	52400000	43700000	69000000	96300000	73500000	57200000	72400000	53400000
	6	53300000	40300000	49400000	73600000	89900000	83200000	101000000	107000000	109000000	74100000	115000000	127000000	104000000	87700000	96300000
	AUC
	EGFPN1			SLC6A14-WT			SLC6A14-V128E			SLC6A14-V128G			SLC6A14-V128W
	Mean	SEM	N	Mean	SEM	N	Mean	SEM	N	Mean	SEM	N	Mean	SEM	N
	291316667	21979441	9	493750000	23314999	9	354983333	23752053	9	433050000	50167312	9	351550000	22386380	9

## Sheet: ED Fig. 4 h
		Extended Data Fig. 4h	L-Serine (13C315N) Relative Abundance					L-Leucine (13C6 + 15N) Relative Abundance
		L-Leucine (13C6;15N)	SLC6A14-GFP				L-Leucine (13C6;15N)	SLC6A14-GFP
		0	0.615935	0.552537	0.667103		0	0.00726123	0.00553214	0.00458899
		50	0.616811	0.518621	0.524169		50	0.856053	0.683188	0.780194
		100	0.567219	0.672065	0.563425		100	1.22666	1.41893	1.33577
		200	0.71198	0.581022	0.56542		200	2.61756	2.52269	2.77784
		400	0.567059	0.607055	0.491246		400	5.0462	5.02809	4.34965
