# Supplementary material for: Phenotypic profiling of solute carriers characterizes serine transport in cancer
Source: Nat Metab. 2023 Dec 8;5(12):2148–68. doi: 10.1038/s42255-023-00936-2 (PMC10730406; doi:10.1038/s42255-023-00936-2)
Supplement: Supplementary file 14 — Statistical source data related to Extended Data Fig. 5. [file 42255_2023_936_MOESM14_ESM.xlsx]

## Sheet: ED Fig 5 a
		Extended Data Fig. 5a
		SLCsiRNA Cell line	NTC			PHGDH CRISPR-1			PHGDH CRISPR-2
		No SG	0.315973	0.36633	0.31942	0.154972	0.267985	0.278288	0.34303	0.236572	0.382411
		SLC6A14 + NTC1	0.784069	0.77768	0.686339	0.329899	0.315586	0.334654	0.633282	0.469249	0.518653
		SLC6A14 + SLC1A4	0.786549	0.763514	0.761917	0.365005	0.485524	0.367243	0.595563	0.600124	0.714467
		SLC6A14 + SLC38A1	0.851072	0.811559	0.814712	0.445056	0.387244	0.397268	0.750238	0.587345	0.592808
		SLC6A14 + SLC25A1	0.826524	0.940773	0.877385	0.479836	0.373304	0.403562	0.620408	0.66967	0.622498
		Parental	0.884615	0.949054	0.96797	0.879342	0.924892	0.934542	0.958449	1.00629	0.996501
		NTC1 + NTC2	0.967087	1.00298	1.02993	0.950254	1.01594	1.0338	0.947476	1.02296	1.02956

## Sheet: ED Fig 5 b
		Extended Data Fig. 5b
		SLCsiRNA Cell line	MCF-7
		Parental	1.06972	1.11949	1.16241
		NTC1 + NTC2	1.15336	1.01044	0.836195
		SLC6A14 + NTC1	1.2268	1.12297	1.29084
		SLC6A14 + SLC38A2	1.01218	1.01694	0.976566
		SLC6A14 + SLC38A5	0.888399	0.826798	0.532019
		SLC6A14 + SLC12A4	0.889791	0.803132	0.660673
		SLC6A14 + SLC25A15	0.748492	0.658353	0.627378
		SLC6A14 + SLC1A5	0.565313	0.590603	0.556032
		No Ser/Gly	0.32471	0.218213	0.27355

## Sheet: ED Fig 5 c
		Extended Data Fig. 5c
		SLCsiRNA Cell line	MDA-MB-231
		NTC1 + NTC2	1.00458	0.962939	1.03248
		SLC6A14 + NTC1	0.700246	0.613726	0.543782
		SLC6A14 + SLC12A4	0.466864	0.431488	0.530036
		SLC6A14 + SLC25A15	0.575115	0.471008	0.600485
		SLC6A14 + SLC1A5	0.54075	0.500927	0.502139
		SLC6A14 + SLC38A5	0.52003	0.547825	0.508002
		No Ser/Gly	0.124322	0.108858	0.102894

## Sheet: ED Fig 5 d
		Extended Data Fig. 5d
		Time (min)	NTC 1 + NTC 2			SLC6A14 + SLC12A4			SLC6A14 + SLC25A15			SLC6A14 + SLC38A2
		0	0	0	0	0	0	0	0	0	0	0	0	0
		1	1.79681e+06	2.08088e+06	1.28637e+06	1.23518e+06	2.0143e+06	1.31083e+06	1.34091e+06	1.14453e+06	1.17731e+06	1.0597e+06	1.38376e+06	1.3434e+06
		3	3.43941e+06	3.15901e+06	4.18844e+06	2.07926e+06	2.67877e+06	2.76157e+06	1.99621e+06	2.28855e+06	2.99062e+06	2.69045e+06	2.38987e+06	2.80307e+06
		6	3.46422e+06	3.33706e+06	3.91884e+06	2.62811e+06	2.82399e+06	2.84675e+06	2.79458e+06	3.25988e+06	3.3586e+06	3.55778e+06	3.22851e+06	3.37388e+06
		AUC	NTC1 + NTC2			SLC6A14 + SLC12A4			SLC6A14 + SLC25A15			SLC6A14 + SLC38A2
			Mean	SEM	N	Mean	SEM	N	Mean	SEM	N	Mean	SEM	N
			16931146	1154817	9	12695916	844890	9	12600730	1032895	9	13543001	498537	9

## Sheet: ED Fig 5 e
		Extended Data Fig. 5e
		Colon		Breast
		Normal Tissue	Primary Tumour	Normal Tissue	Primary Tumour
		-9.966	2.793	-0.7108	-9.966
		-0.6193	0.2881	1.465	-4.608
		-9.966	1.923	-6.506	-9.966
		-9.966	1.001	-4.608	-1.056
		-9.966	2.311	0.2998	-1.781
		-6.506	1.105	-5.574	-0.5125
		-2.114	3.511	-9.966	-1.831
		-3.626	2.687	-0.0877	-4.608
		-9.966	2.388	2.701	4.576
		-1.552	-1.884	-3.626	-0.3383
		-9.966	1.311	1.39	0.8408
		-6.506	-5.966	-6.506	-1.781
		-3.458	1.351	-0.8339	-3.047
		-6.506	-0.1828	1.396	-0.0277
		-9.966	2.208	-5.574	2.084
		-9.966	-0.6643	-6.506	-2.466
		-6.506	-0.2584	-9.966	0.1776
		-6.506	-2.178	-5.574	-4.035
		-9.966	3.47	0.6969	-0.5756
		-9.966	-2.727	2.848	1.245
		-4.293	4.332	-6.506	1.19
		-2.548	-0.1032	1.465	-1.884
		-6.506	-1.884	-0.8599	-3.171
		-9.966	3.056	0.8961	4.425
		-3.308	-1.994	-6.506	2.791
		-9.966	4.272	0.8883	-1.431
		-9.966	3.839	3.361	-0.7108
		-4.035	-3.047	-9.966	3.156
		-6.506	-5.574	-6.506	-9.966
		-6.506	1.071	0.1903	2.064
		-5.574	0.1776	-9.966	-4.035
		-2.315	2.568	-2.826	-2.315
		-9.966	2.554	1.556	-2.932
		-9.966	-2.315	-1.056	-2.548
		-9.966	3.265	-1.117	2.108
		-5.012	4.895	3.682	0.2881
		-9.966	-2.548	1.145	-0.4719
		-9.966	-0.8599	-6.506	-4.608
		-6.506	0.9268	2.091	-0.3201
		-9.966	-1.392	2.025	-4.293
		-5.574	0.6969	-0.0425	-0.1345
		-6.506	-3.885	-9.966	-3.047
		-9.966	3.236	3.509	3.53
		-6.506	1.171	-1.214	-3.308
		-9.966	3.477	-1.685	-2.466
		-1.248	-1.086	-6.506	3.043
		-2.178	-0.5332	0.8164	0.688
		-9.966	-4.293	1.008	0.434
		-2.053	-1.47	-9.966	-3.171
		-9.966	-2.245	2.17	4.804
		-9.966	0.7233	-0.1828	-1.884
		-5.012	1.276	-9.966	-3.626
		-2.388	-1.831	2.703	-3.458
		-5.012	2.977	0.5069	-1.149
		-6.506	3.471	1.86	0.3231
		-5.574	2.714	2.251	-9.966
		-5.574	2.064	-9.966	-4.608
		-5.574	0.7748	-1.639	-5.012
		-9.966	2.365	1.506	0.4016
		-6.506	0.5568	-9.966	-9.966
		-9.966	-0.1504	2.177	0.6517
		-6.506	-5.012	-9.966	1.444
		-4.293	3.144	1.683	1.486
		-6.506	1.852	-6.506	-0.9406
		-4.293	1.903	-9.966	-1.149
		-4.293	0.8246	-5.574	3.479
		-6.506	1.665	-5.012	0.6332
		-9.966	3.214	-9.966	-9.966
		-6.506	1.177	-2.932	0.4552
		-1.781	2.764	0.3907	1.836
		-9.966	-4.035	-6.506	-0.6643
		-9.966	3.794	0.1388	4.69
		-9.966	4.074	0.7233	-1.685
		-5.012	4.091	1.779	-4.608
		-9.966	0.5859	-9.966	-2.635
		-4.608	3.108	1.964	-1.086
		-4.293	0.2029	3.454	-2.114
		-3.047	3.719	-1.47	-5.574
		-9.966	-1.47	-0.6193	1.221
		-6.506	0.8327	-9.966	-6.506
		-9.966	2.351	-1.392	-1.552
		-9.966	2.057	-0.6416	5.929
		-6.506	-0.6416	-9.966	-5.574
		-3.626	4.715	1.696	-1.026
		-9.966	1.896	-9.966	-3.626
		-9.966	-1.732	3.639	-0.1031
		-6.506	-9.966	3.349	1.47
		-9.966	3.126	-9.966	3.2
		-9.966	-0.7588	-1.248	1.949
		-9.966	2.846	1.82	-2.932
		-9.966	3.819	1.609	-3.816
		-4.293	2.473	-9.966	-1.47
		-9.966	2.894	2.272	-2.826
		-9.966	3.025	3.739	-5.574
		-9.966	2.967	-1.994	-0.7108
		-4.608	-2.932	1.766	1.145
		-9.966	3.617	1.125	4.243
		-9.966	2.404	2.681	-3.626
		-5.574	2.157	0.7664	1.923
		-6.506	2.144	3.057	0.1124
		-9.966	2.084	2.131	2.06
		-4.035	0.6608	-1.47	-6.506
		-9.966	-1.248	-9.966	0.4967
		-9.966	-1.938	1.546	-2.178
		-6.506	2.202	1.311	-2.635
		-5.574	2.563	-9.966	-3.626
		-9.966	4.42	-2.826	0.2881
		-4.293	2.217	1.872	-0.0277
		-4.608	3.944	1.138	2.125
		-9.966	0.9862	0.8961	-0.3022
		-9.966	1.637	-0.3022	-1.831
		-1.938	3.3	1.856	-5.574
		-3.308	-2.727	2.272	-1.595
		-9.966	6.395	-9.966	3.372
		0.8568	3.133	2.892	-0.4131
		-9.966	4.074	-1.685	1.986
		-5.574	2.039	3.167	0.1124
		-2.245	0.4233	0.9343	-2.114
		-9.966	2.18	-0.9971	5.346
		-6.506	0.9493	0.3573	1.934
		-9.966	2.478	-9.966	-6.506
		-4.293	1.824	-0.6643	-9.966
		-6.506	2.936	-9.966	-0.2328
		-9.966	3.03	-0.3752	-2.932
		-9.966	1.362	1.098	-3.047
		-4.608	0.7916	-9.966	6.619
		-9.966	0.1776	-6.506	0.537
		-9.966	0.3115	-9.966	-0.1828
		-6.506	1.945	1.93	-3.816
		-9.966	1.619	1.105	-1.392
		-9.966	2.101	4.086	1.956
		-9.966	1.345	-5.574	-3.261
		-9.966	1.138	-0.3201	-5.823
		-6.506	2.797	-0.394	1.564
		-6.506	-6.506	1.138	3.764
		-9.966	1.406	-1.392	-2.635
		-9.966	0.1776	2.342	-5.322
		-9.966	3.175	1.915	1.221
		-1.994	-3.458	2.864	-3.568
		-9.966	1.585	-9.966	3.186
		-6.506	3.062	-0.6193	6.374
		-5.012	5.448	-9.966	-2.245
		-5.012	-0.2671	-9.966	-0.2464
		-5.012	1.705	-0.9971	-2.363
		-2.466	3.917	-9.966	0.517
		-9.966	4.36	0.9642	0.8726
		-5.012	-0.2498	-9.966	-6.506
		-2.388	5.147	-5.574	-1.994
		-2.466	0.1648	1.317	-2.245
		0.1388	0.8726	3.761	-9.966
		-3.816	3.205	-9.966	-1.994
		0.7493	-0.5973	-5.574	0.346
		-3.458	6.108	-9.966	-0.2671
		-4.035	0.6332	0.8647	-3.626
		-4.293	4.006	1.656	0.4657
		-4.293	0.8327	1.993	0.8327
		-5.574	3.87	-0.3201	-1.318
		-5.012	1.88	-9.966	-6.506
		-0.7834	1.311	1.396	-6.506
		-3.816	2.401	0.1903	-3.308
		-9.966	1.77	-4.608	1.092
		-4.293	-4.293	-9.966	-0.9686
		-6.506	2.687	-1.318	2.473
		2.053	4.659	0.4865	3.292
		-5.574	0.0854	-6.506	-9.966
		-3.047	0.8327	-2.114	4.018
		-5.574	5.069	0.3907	-9.966
		-1.355	-2.315	3.749	-6.506
		-3.458	-1.181	1.362	-3.626
		-6.506	5.111	-2.466	-3.458
		-5.574	2.797	1.609	-4.608
		-1.884	-0.6643	-0.0574	-6.506
		-3.458	0.8327	-9.966	-1.149
		-5.574	-0.8599	2.924	-0.4325
		-5.574	2.428	1.444	0.3796
		-9.966	-2.548	-6.506	-6.506
		-3.308	-2.826	-6.506	-9.966
		-6.506	3.512	-9.966	-5.012
		-9.966	1.876	0.2642	-9.966
		-1.595	-0.1993	2.59	0.2642
		-5.012	1.595	1.317	3.192
		-6.506	-1.355	-0.1187	0.8726
		-3.171	-1.685	-3.458	-0.1665
		-3.626	-0.6873	0.5069	1.605
		-5.574	4.039	0.6332	-2.315
		-9.966	4.713	3.133	-5.574
		-3.816	-3.171	-9.966	-6.506
		0.2029	3.695	1.74	-0.5756
		-4.035	-2.388	2.692	-4.293
		-9.966	-3.047	3.628	4.19
		-4.035	1.692	2.287	-4.608
		-9.966	3.934	3.644	-1.392
		-9.966	4.053	3.283	-6.506
		-9.966	1.368	3.507	-9.966
		-2.932	0.0158	3.856	-3.816
		-9.966	2.529	-9.966	-6.506
		-5.012	-1.431	4.532	-6.506
		-4.608	2.37	-0.6643	2.125
		-9.966	1.05	3.18	-5.574
		-3.171	-1.781	2.766	-0.9132
		-3.458	2.47	4.986	-9.966
		-9.966	1.444	3.502	0.1903
		-9.966	-0.2845	3.303	-5.574
		-3.458	3.342	3.442	-6.506
		-4.035	-2.315	3.116	-4.293
		-5.012	0.4865	5.041	-0.5756
		-6.506	3.045	2.938	-2.727
		-4.608	-5.574	1.82	-5.012
		-5.574	1.158	3.829	-2.114
		-9.966	0.8164	4.292	0.2642
		-9.966	2.539	-6.506	-3.458
		-4.608	2.177	4.146	3.401
		-9.966	-4.293	0.3231	-2.932
		-0.013	-5.574	3.067	-4.608
		-9.966	3.322	3.37	-3.171
		-5.012	-0.3022	4.055	-6.506
		-6.506	0.1519	1.496	-1.181
		-4.293	0.03	2.911	-3.458
		-9.966	1.896	2.554	-3.308
		-6.506	-0.7834	1.27	-5.012
		-3.816	2.37	1.683	0.8246
		-5.574	-0.2671	1.015	-0.4719
		-4.608	2.716	4.26	-5.012
		-5.574	2.604	3.628	-0.0877
		-0.0277	0.8408	3.29	-6.506
		-1.781	4.393	-9.966	-0.6643
		-2.932	-0.9971	4.496	-4.293
		-6.506	-0.6643	0.5069	-3.171
		-9.966	5.387	3.45	-6.506
		-9.966	-1.781	2.526	-3.458
		-0.6193	-1.392	2.78	-5.012
		-2.466	0.8408	1.385	-3.171
		-4.608	-6.506	3.801	-6.506
		-6.506	1.714	1.605	-9.966
		-6.506	4.149	3.138	-3.308
		-5.574	1.804	2.167	-5.574
		-6.506	1.868	3.494	-4.035
		-9.966	3.309	3.618	-1.831
		-9.966	-6.506	2.685	-3.626
		-6.506	4.036	1.245	-5.574
		-3.626	-0.0277	-9.966	-1.595
		-5.012	1.714	3.441	-9.966
		-2.548	3.377	2.903	-5.574
		-2.053	0.8883	3.844	-3.171
		-3.816	-2.466	3.996	0.9268
		-5.012	-2.245	2.826	0.8961
		-4.293	-2.635	0.9716	-3.458
		-9.966	-0.3201	3.522	-9.966
		-6.506	3.231	3.696	0.03
		-3.816	3.036	3.957	-6.506
		-9.966	-1.47	1.428	-0.0725
		-6.506	1.317	1.812	-2.932
		-9.966	-6.506	4.473	1.816
		-3.626	1.774	0.044	-2.932
		-6.506	1.93	3.957	1.501
		-9.966	-2.315	4.16	4.82
		-9.966	-3.308	2.886	-3.047
		-9.966	0.8568	3.361	2.422
		-6.506	1.614	2.846	-0.9406
		-1.595	1.749	3.731	0.6239
		-6.506	-0.1031	3.98	1.449
		-6.506	-5.012	-0.9971	3.861
		-6.506	-9.966	3.231	-4.608
		-0.7346	1.476	3.753	-1.884
		-6.506	6.269	3.666	-9.966
		-9.966	1.322	0.099	-2.548
		-4.293	2.71	1.576	-1.938
		-9.966	4.692	1.66	-2.727
		-9.966	-2.245	2.193	-1.392
		-6.506	-1.51	-6.506	-0.0425
		-6.506	3.007	2.723	-1.362
		-3.047	-3.047	3.437	-1.595
		-9.966	2.018	4.622	-4.442
		-2.053	1.971	2.701	-3.458
		-9.966	-3.458	-0.1993	-5.012
		-3.626	1.071	4.338	0.1124
		-6.506	0.4447	5.166	-9.966
		-9.966	3.055	2.836	0.1124
		-2.245	-5.012	2.858	1.183
		-9.966	-3.816	2.774	-4.608
		-9.966	-6.506	1.164	-3.047
		-2.826	-1.214	-9.966	-5.574
		-6.506	-5.574	1.27	0.03
		-3.626	-1.831	0.8082	-5.574
		-5.574	-5.574	2.671	-9.966
		-5.574	0.1648	-9.966	1.868
		-9.966	-5.574	0.7999	-0.8339
		-9.966	4.666	-9.966	-0.4719
		-9.966	3.45	0.4016	-1.732
		-4.608	1.406	-3.308	-2.315
		2.365	-1.732	-9.966	-0.4325
		-6.506	1.305	3.479	-6.506
		-3.626	-2.932		-9.966
		-9.966	4.057		-0.4325
		-9.966	-2.826		-1.884
		-6.506	-2.548		-2.388
		-9.966	2.975		-1.595
		-3.816	3.141		-4.035
		-9.966	2.398		-4.035
		-9.966	-0.5543		-0.3752
		-6.506	0.5955		-6.506
		-1.994	1.281		-2.548
		-5.012	0.4657		-1.884
		-9.966	-5.012		1.368
		-9.966	0.9862		1.762
		-4.608	2.486		-6.506
		-4.608	0.537		-6.506
		-5.574	1.112		5.661
		-4.608	6.086		0.2642
		-0.3752	4.966		2.913
		-3.047	-2.548		-3.047
		-2.727	1.938		4.11
		-5.574	1.556		-2.053
		-1.47	1.614		-6.506
		-0.7346	-1.781		4.053
		-2.932	0.2881		-4.608
		-0.0877	0.547		4.687
		-2.548	2.196		-4.608
		-3.047	-0.1345		-0.0574
		-2.388	1.828		-9.966
		-2.635	-2.178		-1.552
		-2.548	-4.293		-1.994
		2.928	-0.1993		5.182
		-2.388	-0.3752		-5.574
		0.9191	4.493		-9.966
		-1.639	0.5666		6.46
		-3.458	1.934		-0.9132
		-3.626	0.9716		-0.2328
		-1.938	3.123		2.544
		-1.938	-1.026		-4.293
		-2.548	1.105		-6.506
		0.2762	4.249		-3.047
		-0.7834	0.2881		-3.816
		-1.214	1.385		2.457
		-3.047	0.4125		-3.047
		-4.293	1.252		-3.458
		-2.114	2.015		-1.595
		0.2762	-2.245		0.0014
		-2.635	2.444		-3.458
		3.149	-1.355		-2.727
		-3.458	0.6425		-9.966
		-6.506	-5.574		-1.552
		-0.013	1.566		-1.026
		2.932	-9.966		6.251
		-1.552	-1.117		-1.552
		-2.114	0.5666		1.812
		1.036	2.131		-6.506
		-1.884	-5.012		3.24
		2.263	1.714		-9.966
		-2.315	4.076		4.082
		-0.3566	-0.0725		-4.293
		-1.086	1.118		-9.966
		-2.245	3.886		-3.816
		-2.466	2.266		0.3231
		-1.086	1.385		-0.8599
		-1.732	4.502		-1.056
		2.554	4.385		1.368
		-6.506	2.236		1.345
		1.05	3.805		-1.552
			-0.1031		-1.431
			1.59		-6.506
			0.0854		0.4447
			-9.966		1.864
			3.027		-9.966
			-2.245		6.15
			3.942		-3.816
			4.374		-9.966
			-1.938		-0.9686
			-0.6193		3.144
			-0.5756		2.499
			0.4233		-9.966
			1.609		-2.466
			-1.181		-1.552
			2.281		1.911
			0.3907		4.237
			-0.7834		-1.392
			-3.458		-9.966
			0.2998		5.435
			1.688		-2.727
			-9.966		-5.574
					-1.086
					-0.6416
					-2.932
					-2.932
					4.291
					-9.966
					-2.548
					-4.608
					1.288
					-9.966
					-9.966
					-2.178
					4.343
					-2.826
					-9.966
					-2.727
					-2.388
					0.5666
					-9.966
					-2.727
					-3.171
					2.248
					-1.781
					4.595
					-6.506
					-4.035
					5.124
					4.547
					5.683
					2.975
					1.177
					2.221
					0.6608
					-9.966
					1.982
					-0.0877
					0.9038
					-3.047
					-4.293
					2.953
					1.799
					-5.012
					-5.574
					-0.8339
					1.614
					-9.966
					-2.466
					-2.932
					1.696
					-4.293
					2.164
					0.2762
					1.993
					-2.178
					-3.816
					-1.283
					4.168
					-4.293
					1.727
					-3.308
					-1.214
					-2.727
					-0.2328
					0.7916
					0.1776
					0.058
					-0.2845
					-4.035
					2.607
					-1.685
					-2.932
					-3.171
					1.164
					-0.5332
					1.633
					1.145
					1.132
					-1.214
					1.258
					1.749
					-0.1828
					-0.4921
					4.614
					-5.574
					2.932
					-0.4521
					0.2154
					-6.506
					-4.293
					-6.506
					-2.466
					-0.4921
					1.057
					-3.458
					2.504
					-4.608
					-9.966
					-0.5756
					0.5666
					3.707
					5.925
					-0.4131
					-5.574
					-2.466
					-2.826
					-9.966
					-2.466
					-1.355
					-9.966
					1.656
					1.029
					-0.1345
					4.534
					0.3796
					-0.4921
					2.125
					-1.283
					-1.994
					5.721
					-0.6416
					-0.4521
					-1.781
					0.1776
					-6.506
					3.342
					-1.51
					-9.966
					3.359
					-2.548
					-0.5125
					-0.5756
					4.188
					-0.5332
					2.227
					2.473
					-3.816
					-0.5973
					-5.574
					-4.293
					-1.248
					3.873
					-1.149
					-0.7346
					-3.458
					0.434
					-0.8339
					1.465
					-1.685
					-2.635
					-1.595
					-0.2498
					-1.431
					2.683
					-0.2159
					-0.9686
					-1.392
					-4.035
					2.778
					0.8647
					1.396
					1.47
					0.3685
					-2.315
					1.975
					0.6332
					-2.635
					-0.0877
					-3.626
					5.243
					-3.458
					0.044
					-1.831
					-1.117
					-0.9971
					-6.506
					0.537
					0.3685
					-3.171
					-1.149
					0.8408
					5.652
					1.27
					-0.7346
					-1.355
					-2.388
					-0.6193
					-1.994
					-2.114
					-4.035
					-2.466
					0.2029
					-1.026
					-1.884
					-1.994
					0.5763
					1.34
					-0.9132
					4.168
					-3.308
					-0.1665
					-1.355
					-9.966
					0.8961
					0.0854
					-1.248
					-0.8084
					-1.117
					-4.608
					-0.7834
					2.331
					-4.608
					1.202
					-9.966
					-6.506
					-2.932
					-1.149
					0.547
					-6.506
					-9.966
					-0.1828
					-1.248
					-0.1993
					-9.966
					-1.994
					-0.8084
					-2.466
					4.277
					-0.1504
					4.328
					-4.293
					-1.086
					-1.884
					-2.245
					-3.816
					-1.47
					-3.816
					-0.7834
					3.677
					-0.2328
					-5.574
					3.42
					-1.938
					3.184
					4.491
					3.908
					-2.826
					-0.5756
					-0.6873
					-5.012
					0.4865
					5.753
					-2.635
					0.8082
					0.8082
					-2.053
					5.354
					-2.548
					3.312
					-6.506
					-2.388
					-1.639
					-4.293
					1.496
					-5.574
					-0.9132
					-4.293
					-1.431
					-2.466
					1.812
					-0.394
					3.027
					-1.781
					-9.966
					-0.2671
					-3.816
					1.036
					0.7146
					-2.114
					-9.966
					0.1903
					0.3685
					4.646
					-5.574
					-9.966
					-3.816
					-4.608
					3.391
					0.7916
					-0.3752
					1.506
					1.71
					-5.574
					-2.635
					1.428
					3.189
					0.7493
					-9.966
					-9.966
					3.454
					-4.035
					-9.966
					-9.966
					0.058
					-1.994
					2.554
					-0.0574
					-5.574
					1.071
					0.7493
					-2.315
					-0.8599
					-5.012
					-4.293
					-0.6193
					3.341
					-0.7108
					1.202
					-3.047
					-9.966
					-9.966
					-1.685
					0.1519
					-3.626
					3.705
					-5.574
					-2.466
					-0.9132
					0.0014
					-3.816
					-9.966
					6.012
					-0.1187
					-4.608
					-1.781
					1.832
					0.517
					-2.635
					5.228
					-6.506
					-2.548
					5.321
					4.13
					-0.0725
					-1.149
					3.444
					-0.8599
					-1.026
					-5.012
					1.832
					-0.8599
					-3.458
					-6.506
					-0.4521
					-0.4719
					0.7579
					-9.966
					-6.506
					0.8805
					3.87
					7.352
					-3.308
					-2.727
					-6.506
					-9.966
					-2.826
					-5.574
					-5.574
					-3.308
					-1.283
					-9.966
					-4.293
					-0.3383
					-6.506
					-4.293
					-5.574
					-2.932
					-0.4719
					-5.012
					-2.932
					-1.884
					1.688
					1.688
					-3.308
					-3.458
					-5.574
					-5.574
					-5.574
					1.997
					-1.214
					-9.966
					-0.5973
					-9.966
					-3.458
					-9.966
					-9.966
					4.773
					-1.392
					3.639
					-0.8599
					1.896
					0.8568
					4.68
					-3.171
					1.132
					-5.574
					-6.506
					1.029
					-2.635
					0.0718
					-1.884
					2.546
					-0.6643
					-4.035
					-0.8339
					-6.506
					-4.293
					-1.214
					-4.608
					-9.966
					-1.639
					-5.012
					-1.552
					-3.171
					4.86
					-9.966
					-1.685
					-0.5973
					2.493
					-9.966
					-3.458
					0.5859
					0.7146
					-5.012
					-0.1993
					6.418
					-0.7346
					2.417
					0.1519
					-0.3383
					-2.466
					-4.608
					-6.506
					1.647
					2.83
					-3.816
					0.4233
					0.03
					0.9268
					-2.114
					-9.966
					-1.595
					-1.149
					-2.932
					-4.293
					-4.608
					0.5763
					-1.056
					0.1388
					-2.315
					-2.932
					-9.966
					-0.9132
					2.251
					0.9568
					-2.178
					-1.47
					-0.8599
					-1.781
					-0.9132
					-2.466
					0.679
					-4.293
					-5.012
					2.465
					0.4016
					-2.178
					-1.552
					-5.012
					0.2154
					0.7493
					-0.3022
					-4.608
					-4.608
					-3.171
					-2.548
					-2.727
					-4.293
					3.702
					0.0854
					3.004
					3.583
					1.465
					4.563
					-3.458
					-3.308
					0.1257
					-5.574
					-0.8084
					-6.506
					5.477
					0.0014
					-5.012
					-5.574
					-5.574
					-1.994
					-5.574
					-6.506
					2.573
					0.2029
					-2.245
					3.319
					5.458
					1.719
					-4.608
					1.015
					-1.831
					-2.466
					0.7321
					-2.315
					-2.245
					0.3573
					-2.727
					-4.293
					-9.966
					-4.293
					-1.732
					1.112
					-2.315
					-4.608
					-9.966
					-5.574
					-5.574
					-9.966
					-1.248
					-6.506
					-2.466
					-9.966
					-2.114
					-9.966
					-1.431
					-3.816
					-9.966
					3.774
					-5.012
					8.944
					-0.1031
					-3.816
					-1.884
					1.071
					2.033
					-5.574
					-1.781
					-2.178
					-2.388
					-3.458
					-9.966
					1.66
					-2.315
					-3.171
					-9.966
					-2.245
					-6.506
					-9.966
					-1.181
					-2.932
					0.547
					0.346
					-1.595
					-1.552
					-9.966
					0.7493
					-0.7834
					0.3115
					-3.308
					0.2522
					3.023
					-9.966
					-2.548
					-5.574
					-9.966
					-0.5543
					-6.506
					6.009
					-2.548
					-4.608
					2.977
					-3.171
					-1.994
					2.842
					-3.626
					0.0014
					-2.826
					-0.6416
					1.449
					2.723
					-1.026
					-2.178
					1.465
					-6.506
					-5.012
					2.148
					-5.574
					-1.552
					-2.315
					-9.966
					-2.245
					-0.2845
					-0.4325
					-2.315
					3.356
					-5.012
					-3.626
					0.3346
					-4.608
					-5.012
					-0.9406
					-1.884
					-0.6873
					-1.781
					-5.012
					-3.816
					2.962
					-3.458
					-4.608
					-1.732
					-0.0425
					-2.826
					-1.51
					-2.388
					0.044
					-0.6643
					2.305
					-1.214
					-4.035
					-1.552
					-2.548
					0.688
					-2.727
					-0.8084
					2.37
					1.276
					5.418
					-9.966
					-9.966
					1.078
					-9.966
					-1.431
					-3.458
					4.538
					-2.388
					-9.966
					2.251
					0.8327
					-0.2845
					-4.608
					-6.506
					-3.171
					-0.9686
					-5.574
					-4.608
					1.311
					0.3231
					-2.114
					-0.9971
					-4.035
					-1.181
					-0.8599
					0.4865
					1.799
					1.245
					3.188
					-5.574
					-0.1665
					-5.574
					-1.214
					-3.816
					-2.727
					-1.214
					2.69
					-4.293
					-5.574
					1.774
					-0.8599
					-3.047
					-1.884
					-2.178
					-6.506
					-1.595
					-0.4521
					-9.966
					3.052
					7.911
					1.276
					-2.053
					-1.056
					5.828
					-1.431
					-2.932
					-9.966
					-0.9686
					4.929
					-9.966
					1.357
					1.696
					-3.308
					1.112
					-5.012
					-4.293
					-1.938
					-1.283
					1.93
					-4.293

## Sheet: ED Fig 5 f
		Extended Data Fig. 5f
		Colon		Breast
		Normal Tissue	Primary Tumour	Normal Tissue	Primary Tumour
		5.978	3.601	6.024	3.265
		2.989	3.909	5.424	4.83
		5.594	2.683	6.342	3.852
		5.509	3.714	4.977	4.081
		5.776	3.2	5.685	4.801
		5.539	4.07	5.852	4.006
		2.941	3.52	5.706	3.879
		4.448	3.108	5.752	2.521
		5.795	3.217	5.65	4.898
		4.611	2.164	5.637	4.77
		5.598	3.938	6.496	3.951
		5.57	1.633	5.62	3.74
		3.205	3.305	5.763	4.536
		5.873	2.517	5.886	4.638
		5.575	4.13	5.533	4.469
		6.012	2.753	6.401	4.812
		3.442	0.9935	6.076	3.59
		5.905	1.806	5.827	4.274
		6.32	3.666	5.561	3.982
		6	2.49	5.386	2.846
		6.069	4.356	5.679	3.636
		5.847	2.143	5.993	3.06
		5.749	2.551	4.981	3.87
		6.443	3.168	5.834	3.315
		3.434	3.549	5.881	2.924
		5.952	4.051	5.789	3.961
		5.514	3.569	5.939	4.341
		5.202	2.328	5.675	3.383
		5.854	3.915	5.993	3.2
		5.975	2.812	5.709	4.948
		6.205	3.823	5.724	4.155
		3.896	3.589	6.146	4.191
		5.598	3.286	6.109	4.188
		5.536	4.264	5.889	4.935
		5.176	2.354	5.503	3.951
		2.921	4.045	5.466	4.702
		4.761	1.334	5.886	4.085
		6.33	4.187	5.326	3.289
		5.087	3.214	6.031	4.192
		5.622	3.662	5.97	3.867
		6.371	4.327	5.547	3.604
		6.069	1.752	5.998	4.562
		6.576	3.751	5.981	3.914
		5.917	3.631	6.066	3.937
		6.321	4.118	5.943	3.118
		6.095	4.733	6.011	3.38
		3.612	3.098	5.81	4.488
		5.749	4.423	5.277	3.638
		5.732	3.549	4.9	2.308
		5.853	4.222	5.93	4.269
		5.368	2.753	5.631	1.86
		2.556	2.966	6.314	3.599
		3.738	3.705	5.728	3.99
		5.154	2.635	5.495	4.099
		6.35	3.372	5.648	4.607
		5.601	2.63	6.162	4.44
		5.42	3.064	5.784	2.447
		5.663	2.878	5.568	3.965
		5.917	3.059	5.985	4.514
		6.093	2.616	5.816	3.651
		5.376	2.783	5.626	3.501
		5.308	2.359	5.703	4.509
		3.746	2.348	6.016	4.456
		5.692	2.428	5.607	3.517
		4.236	3.283	6.05	3.106
		4.586	3.319	5.309	3.272
		5.571	3.675	5.712	3.813
		5.878	4.411	5.836	4.321
		6.113	2.975	5.659	3.289
		2.991	1.86	5.631	4.216
		5.127	2.71	5.438	3.76
		6.066	1.071	6.005	3.362
		5.576	3.642	4.287	3.711
		3.777	2.943	4.817	3.088
		5.425	3.537	5.835	3.72
		2.943	3.521	5.837	4.117
		3.453	3.036	5.906	3.631
		3.405	4.577	5.613	4.672
		4.165	3.951	5.353	4.795
		5.348	4.524	5.308	3.891
		5.677	3.069	6.08	4.681
		5.953	3.761	5.983	4.549
		5.898	3.693	5.985	3.074
		3.248	2.986	5.759	2.844
		5.84	3.403	5.627	3.106
		5.348	4.722	5.65	4.165
		5.987	3.991	6.137	2.872
		6.051	2.559	5.738	4.245
		5.508	3.237	5.614	4.535
		5.861	2.926	5.945	4.266
		5.712	3.181	5.364	3.392
		2.239	2.604	6.157	2.971
		6.228	3.556	5.466	2.362
		5.873	2.266	5.721	4.078
		5.583	4.452	5.84	4.805
		5.839	3.77	5.749	4.091
		5.624	4.301	6.045	3.561
		5.947	1.88	5.43	3.699
		5.679	3.039	5.972	4.419
		6.261	2.018	5.765	3.981
		5.992	4.264	5.811	4.668
		3.661	1.799	6.292	4.328
		5.86	3.579	5.835	4.31
		5.521	3.546	5.896	3.038
		3.302	3.287	5.784	3.965
		4.322	1.848	5.464	4.014
		5.873	3.228	5.762	4.974
		6.03	3.899	5.421	4.234
		6.126	3.502	5.488	3.935
		5.829	3.783	6.084	2.78
		5.667	3.625	5.974	3.361
		3.684	2.439	6.353	2.373
		6.011	3.262	6.006	4.888
		5.564	3.818	5.652	3.654
		3.368	3.556	5.92	4.741
		5.971	3.233	5.885	4.367
		5.672	1.832	5.76	3.471
		3.335	4.807	5.96	4.527
		6.059	2.797	5.698	5.799
		5.784	3.328	6.6	5.471
		5.463	2.296	5.646	3.484
		3.233	3.647	6.016	6.757
		5.845	3.981	5.592	4.691
		5.694	2.768	5.656	3.139
		5.62	2.894	5.363	3.579
		4.199	1.683	5.473	4.78
		3.853	3.924	5.891	3.66
		5.715	3.262	5.789	3.864
		5.867	3.305	6.041	2.828
		6.327	3.173	6.161	3.877
		5.784	2.354	5.014	4.349
		5.707	3.383	5.793	2.489
		5.911	2.958	5.261	2.455
		5.429	2.465	5.63	3.164
		6.168	2.874	5.587	2.633
		5.158	2.556	5.299	4.657
		5.064	3.405	5.787	3.051
		6.158	3.749	5.345	4.342
		2.559	3.429	5.925	2.748
		2.242	4.006	5.615	3.642
		5.023	2.787	5.941	4.13
		5.189	4.663	5.69	4.259
		4.09	1.884	5.544	3.571
		4.299	2.694	5.223	3.018
		3.387	4.105	5.991	3.616
		5.584	3.362	6.27	3.392
		4.107	2.095	6.186	2.431
		5.923	2.433	5.667	4.315
		3.26	3.189	5.911	4.469
		4.288	3.517	5.584	3.54
		3.577	3.609	5.902	4.602
		3.53	3.402	5.668	4.91
		5.105	4.331	5.653	3.65
		3.837	3.778	5.959	4.611
		3.467	3.473	5.824	4.323
		4.491	3.06	5.647	4.252
		3.786	3.806	5.746	4.721
		5.135	3.086	5.579	4.657
		4.39	2.516	5.839	4.165
		4.879	3.359	5.292	4.866
		5.724	2.903	5.586	3.968
		4.39	3.534	5.799	4.759
		4.48	2.58	5.435	4.83
		3.462	4.054	5.735	3.642
		3.649	2.071	6.155	5.291
		3.941	2.546	5.975	3.94
		3.436	3.916	6.008	3.296
		3.977	2.595	5.47	2.266
		5.219	3.321	5.228	4.147
		5.981	2.846	6.185	0.9716
		4.057	3.81	5.131	3.45
		3.677	3.011	5.39	2.501
		3.855	3.763	5.676	3.709
		4.505	2.922	5.755	3.794
		4.008	2.401	5.619	4.237
		-9.966	3.717	6.42	1.444
		3.303	2.576	6.018	3.502
		5.611	4.015	5.646	3.94
		5.781	3.146	5.339	2.757
		4.524	2.551	4.776	2.609
		2.803	3.609	4.847	3.076
		3.847	3.211	5.16	4.358
		3.379	4.997	4.846	4.198
		3.853	3.292	5.02	4.078
		3.994	3.387	5.178	4.393
		5.835	2.84	5.22	4.243
		4.667	2.242	4.724	3.694
		3.569	3.776	4.184	3.082
		3.141	1.86	4.916	3.61
		5.961	3.256	4.558	4.636
		3.465	3.329	4.756	3.059
		-9.966	4.704	4.658	2.951
		5.549	2.683	5.283	3.086
		-9.966	3.752	5.05	4.385
		2.977	3.763	4.689	2.033
		-9.966	3.036	5.181	4.129
		4.593	4.676	4.714	3.537
		4.24	4.381	5.066	4.01
		5.492	3.491	4.963	4.077
		2.986	3.728	4.638	3.754
		3.413	3.792	4.553	3.692
		5.922	3.203	4.678	3.716
		5.536	3.519	5.261	2.514
		3.283	4.173	4.527	3.474
		3.293	3.816	4.372	3.297
		5.633	2.671	4.893	4.23
		5.95	2.646	4.343	3.527
		4.899	4.153	4.765	3.183
		5.879	3.53	4.647	3.825
		5.471	4	4.544	4.103
		5.51	2.949	5.504	3.222
		3.911	2.822	4.195	3.954
		5.8	2.115	4.639	3.575
		4.555	3.678	4.41	3.511
		5.769	3.522	4.999	2.506
		5.77	2.433	4.434	4.622
		6.143	2.894	4.915	4.286
		4.095	2.121	4.39	2.729
		6.135	3.346	4.761	2.783
		5.893	4.914	4.962	3.319
		3.901	2.736	4.524	3.234
		4.115	2.943	4.02	4.274
		5.208	3.188	4.188	4.246
		5.457	2.004	4.722	4.472
		3.791	3.011	4.115	3.556
		4.802	4.575	5.284	4.269
		3.546	3.057	4.872	3.87
		6.04	3.981	5.083	3.889
		6.283	3.416	5.279	4.251
		5.133	4.541	4.906	3.856
		3.641	4.351	5.236	2.091
		3.297	3.824	5.364	3.526
		5.801	4.102	5.289	2.095
		6.205	3.78	4.853	2.866
		5.706	4.297	5.454	4.014
		5.354	3.456	4.723	2.707
		5.598	3.625	5.339	4.18
		5.437	3.712	4.825	4.312
		5.399	3.444	4.608	4.026
		5.82	3.725	5.014	3.125
		3.515	2.351	4.55	2.903
		4.807	3.069	5.101	4.012
		2.856	2.365	4.925	3.871
		3.56	2.895	4.495	4.007
		5.313	3.721	4.631	4.589
		5.359	1.202	4.529	3.783
		3.372	4.383	4.957	3.831
		6.02	4.036	5.053	4.12
		5.708	3.791	4.575	3.414
		4.874	2.718	4.739	3.967
		5.97	3.744	4.693	4.31
		6.062	1.595	4.629	4.011
		5.726	3.125	4.507	4.958
		3.638	1.305	2.551	3.002
		5.908	2.161	4.932	4.709
		5.745	3.876	4.352	4.484
		5.374	2.177	5.049	2.897
		5.386	0.8568	3.905	3.683
		5.819	3.118	4.52	4.191
		5.604	2.592	5.163	4.041
		5.85	2.683	4.581	4.103
		5.428	2.316	4.931	4.997
		6.012	1.953	4.526	3.562
		3.822	4.399	4.606	4.399
		5.445	2.793	5.122	3.333
		5.882	3.5	5.205	4.494
		3.445	3.03	4.249	4.869
		5.736	3.143	5.095	4.276
		5.418	2.368	4.925	4.422
		4.663	3.824	4.494	4.867
		5.997	2.454	5.293	2.065
		3.768	2.154	5.086	3.862
		5.881	3.183	4.134	2.598
		4.865	1.997	4.558	3.809
		5.666	1.647	4.739	3.651
		3.726	2.067	4.194	4.383
		5.431	2.101	4.723	4.951
		5.438	4.736	4.99	4.732
		4.563	2.982	5.246	5.108
		5.469	2.614	5.274	3.859
		5.637	3.37	5.158	3.996
		4.005	3.716	5.717	4.071
		5.937	3	5.226	3.715
		3.625	2.509	5.011	3.465
		4.803	2.678	4.255	3.896
		5.169	2.519	5.216	2.345
		5.127	3.03	4.803	4.05
		6.291	3.269	5.143	4.947
		5.801	4.568	4.821	3.603
		3.566	3.151	5.061	4.824
		3.791	2.87	3.859	3.628
		4.871	2.351	5.038	3.707
		6.326	3.256		4.659
		6.093	2.646		4.167
		4.456	2.932		4.41
		4.775	3.377		4.748
		5.496	2.491		4.62
		5.059	4.148		4.03
		6.207	3.912		2.311
		5.944	3.906		4.341
		5.127	3.121		2.808
		5.395	3.335		3.908
		5.421	4.722		4.022
		6.114	4.608		2.526
		5.812	3.696		2.83
		3.045	3.334		2.649
		5.278	3.535		2.272
		5.932	4.138		3.887
		3.108	3.999		3.517
		4.114	4.54		2.635
		3.181	3.881		3.852
		3.21	3.774		3.767
		2.616	3.417		4.039
		2.454	3.679		4.133
		2.242	3.03		2.824
		1.934	4.008		3.328
		2.787	3.671		3.908
		2.653	3.859		4.567
		2.66	3.254		4.321
		3.585	4.636		3.927
		2.313	3.31		3.56
		2.761	3.057		2.832
		3.167	4.498		4.657
		4.08	3.943		5.056
		2.808	3.473		3.5
		2.628	3.691		3.616
		2.749	3.787		4.583
		2.362	3.496		4.757
		2.662	3.578		4.391
		2.718	4.025		3.823
		2.526	4.074		3.724
		2.266	3.926		4.278
		2.846	2.196		3.275
		1.923	3.24		4.527
		2.838	4.259		4.081
		2.705	3.375		4.135
		1.852	3.577		3.618
		2.803	4.868		4.105
		3.772	3.571		2.618
		3.441	1.753		2.266
		3.091	2.138		2.401
		2.269	3.138		3.098
		3.987	3.645		3.417
		3.129	3.977		5.015
		4.303	3.63		4.32
		1.915	4.351		3.801
		2.118	2.501		2.878
		1.66	2.971		3.969
		3.21	3.329		5.205
		4.372	2.938		3.123
		3.515	2.936		2.642
		3.531	3.131		4.011
		3.524	3.582		3.525
		3.096	3.622		4.171
		3.009	2.105		2.982
		3.604	3.743		3.106
		4.166	3.995		2.245
		4.973	3.315		3.641
		3.795	1.993		4.387
			3.398		4.157
			2.751		2.483
			2.687		4.016
			3.077		3.345
			3.955		4.631
			4.128		3.071
			3.575		3.436
			3.25		3.785
			3.963		3.636
			2.491		3.986
			3.932		4.329
			2.956		4.15
			2.888		3.936
			1.945		3.096
			3.885		4.291
			3.387		3.646
			2.658		3.036
			2.254		3.628
			3.664		3.779
			2.858		2.511
			5.117		3.368
					2.66
					3.348
					4.811
					4.007
					4.558
					3.779
					4.696
					3.72
					3.95
					3.125
					3.146
					5.091
					4.824
					4.558
					3.79
					4.616
					3.148
					3.334
					2.257
					2.091
					3.996
					3.694
					3.902
					4.03
					2.111
					2.519
					4.15
					3.138
					3.418
					3.409
					4.688
					4.39
					4.491
					3.783
					3.96
					4.244
					3.262
					3.116
					3.465
					2.975
					4.834
					3.588
					2.852
					4.141
					4.206
					3.077
					3.016
					3.769
					3.947
					3.9
					4.225
					3.955
					3.696
					3.975
					3.925
					4.371
					3.432
					4.484
					4.42
					3.514
					3.084
					4.401
					3.292
					3.48
					3.545
					4.09
					2.776
					2.716
					4.825
					3.661
					3.355
					3.777
					4.398
					4.853
					4.502
					4.928
					4.736
					4.41
					4.188
					4.397
					4.353
					3
					1.496
					3.477
					5.62
					3.856
					4.656
					2.539
					4.007
					3.864
					2.665
					4.539
					4.326
					3.448
					3.022
					3.691
					3.014
					3.355
					3.842
					2.738
					3.438
					3.61
					3.401
					4.207
					2.504
					2.838
					3.541
					4.614
					4.027
					4.382
					3.055
					3.676
					4.28
					3.461
					3.86
					4.381
					4.553
					3.941
					4.571
					4.801
					4.018
					2.683
					3.067
					3.954
					3.812
					3.379
					2.578
					2.549
					3.796
					3.951
					4.011
					3.625
					5.04
					4.487
					2.718
					3.879
					4.541
					4.144
					4.453
					4.278
					4.583
					2.696
					4.761
					4.196
					3.718
					3.77
					3.898
					3.537
					4.714
					3.702
					4.484
					2.967
					3.071
					4
					3.853
					4.714
					3.938
					3.758
					4.666
					4.987
					3.265
					4.816
					4.363
					3.961
					4.623
					3.477
					3.115
					3.729
					5.533
					4.19
					3.133
					4.196
					4.484
					4.224
					3.766
					4.435
					4.003
					3.954
					5.245
					3.563
					3.998
					3.918
					4.485
					4.359
					3.679
					4.137
					4.736
					4.047
					4.155
					1.486
					3.391
					3.22
					3.52
					4.068
					4.658
					4.797
					3.557
					3.471
					4.401
					3.604
					3.948
					3.294
					3.869
					3.643
					3.935
					3.928
					4.034
					4.01
					3.257
					4.09
					3.609
					2.514
					5.362
					2.665
					3.442
					4.007
					4.07
					3.696
					3.465
					4.344
					3.531
					3.636
					3.926
					4.755
					4.282
					3.949
					4.257
					4.414
					3.607
					3.572
					4.281
					4.403
					4.213
					2.882
					4.592
					3.864
					3.837
					3.947
					3.05
					3.44
					2.211
					3.239
					4.136
					3.945
					4.315
					4.38
					3.668
					4.248
					3.899
					3.927
					4.869
					3.739
					3.569
					3.545
					2.428
					3.202
					2.467
					4.442
					2.141
					2.696
					4.144
					2.242
					4.964
					4.209
					3.532
					3.213
					3.977
					3.964
					4.471
					4.795
					2.447
					2.669
					2.832
					4.519
					2.496
					5.048
					3.682
					4.171
					3.608
					4.871
					4.209
					3.111
					4.39
					3.391
					5.504
					3.547
					4.446
					4.783
					4.26
					3.806
					3.937
					3.077
					4.199
					4.044
					3.911
					4.466
					3.986
					2.607
					3.768
					4.629
					3.799
					3.43
					2.975
					3.721
					4.28
					4.277
					2.074
					5.061
					3.462
					3.184
					3.418
					3.56
					2.414
					3.469
					2.705
					2.057
					3.644
					3.006
					2.703
					2.838
					3.545
					3.84
					2.886
					3.894
					3.776
					5.047
					3.424
					3.405
					2.583
					3.489
					3.449
					4.281
					4.22
					4.364
					4.28
					4.631
					3.257
					3.941
					4.32
					4.351
					4.098
					4.22
					4.508
					4.463
					5.124
					3.929
					3.763
					4.321
					3.995
					4.134
					4.41
					4.001
					3.577
					3.719
					4.639
					3.432
					4.198
					4.005
					4.446
					3.483
					3.02
					3.799
					3.577
					1.642
					4.535
					4.023
					3.826
					2.878
					3.882
					4.56
					4.599
					4.828
					3.154
					5.033
					4.476
					4.52
					3.125
					4.24
					2.982
					4.922
					3.884
					3.876
					3.82
					3.417
					5.178
					4.23
					2.478
					3.442
					4.068
					4.193
					4.038
					4.145
					3.741
					1.749
					3.422
					4.847
					4.001
					5.352
					4.764
					4.239
					4.654
					4.373
					4.554
					4.502
					3.977
					4.267
					3.923
					3.92
					4.724
					4.489
					5.206
					4.142
					4.123
					3.825
					3.583
					3.401
					3.471
					3.474
					3.891
					3.889
					2.665
					3.863
					4.415
					2.822
					3.332
					5.181
					4.114
					4.183
					3.027
					2.573
					4.598
					3.947
					3.693
					2.975
					2.514
					3.646
					4.029
					4.728
					4.662
					3.685
					3.691
					3.227
					3.465
					3.704
					4.185
					3.909
					3.851
					4.434
					3.929
					3.651
					4.036
					3.945
					2.723
					3.931
					3.91
					3.602
					3.313
					3.759
					2.731
					3.168
					3.942
					4.087
					3.971
					4.256
					3.91
					3.569
					3.136
					3.962
					3.148
					3.882
					4.315
					4.761
					3.645
					2.696
					4.668
					3.66
					4.436
					4.135
					4.847
					3.934
					4.116
					3.802
					3.194
					4.416
					3.505
					4.305
					4.408
					2.039
					2.938
					3.152
					3.696
					4.766
					1.215
					3.29
					3.614
					4.394
					1.907
					4.084
					4.712
					3.794
					2.59
					3.345
					3.827
					3.082
					3.691
					4.429
					4.351
					3.941
					3.625
					5.168
					3.395
					3.874
					4.056
					4.428
					4.805
					4.53
					3.717
					4.026
					4.079
					4.474
					4.693
					4.265
					3.417
					4.316
					1.919
					3.939
					2.257
					4.236
					3.838
					2.529
					3.978
					4.542
					3.686
					4.003
					4.702
					3.747
					2.747
					5.001
					4.03
					3.817
					2.806
					4.451
					2.895
					3.544
					2.536
					3.088
					3.013
					3.038
					3.03
					2.311
					3.491
					3.99
					3.636
					3.894
					3.03
					3.363
					3.776
					3.871
					3.588
					0.2522
					3.537
					3.323
					4.343
					3.069
					4.288
					4.32
					5.43
					3.454
					3.409
					2.943
					4.555
					2.812
					4.036
					2.723
					3.269
					4.342
					3.795
					3.065
					2.694
					4.868
					4.564
					4.142
					3.866
					4.87
					3.113
					4.271
					3.37
					3.767
					3.213
					3.39
					4.592
					3.807
					4.793
					4.776
					3.597
					4.762
					3.859
					4.359
					2.922
					4.494
					3.91
					3.916
					4.517
					4.438
					1.609
					1.836
					4
					3.829
					3.933
					3.977
					3.995
					3.779
					4.305
					2.759
					4.385
					3.686
					4.417
					3.996
					4.246
					4.393
					4.297
					4.014
					3.418
					3.705
					3.409
					4.684
					2.761
					4.654
					4.475
					3.045
					4.056
					3.721
					4.804
					4.679
					3.592
					4.43
					4.674
					4.789
					4.5
					4.341
					5.033
					4.875
					3.964
					3.553
					3.965
					4.248
					3.38
					2.997
					4.395
					3.736
					4.184
					4.132
					4.672
					4.216
					5.079
					2.414
					3.394
					4.398
					4.098
					3.696
					4.577
					4.241
					3.992
					3.136
					2.93
					3.529
					4.119
					4.79
					3.737
					4.284
					4.22
					2.398
					3.859
					3.719
					4.046
					4.351
					4.502
					4.584
					4.212
					3.31
					3.974
					2.509
					4.673
					3.429
					5.227
					4.049
					4.406
					4.138
					3.563
					2.783
					4.22
					4.456
					4.475
					3.731
					3.599
					3.108
					3.466
					4.982
					3.175
					4.103
					3.765
					3.175
					3.412
					3.486
					3.612
					4.794
					3.873
					3.536
					4.811
					5.017
					4.573
					2.856

## Sheet: ED Fig 5 g
		Extended Data Fig. 5g
		Colon		Breast
		Normal Tissue	Primary Tumour	Normal Tissue	Primary Tumour
		0.5859	2.671	1.412	3
		1.623	2.316	1.566	1.993
		0.058	3.119	-0.3022	3.233
		-0.2498	3.125	0.8408	2.757
		0.3685	4.004	1.196	3.154
		-0.5543	3.889	1.551	2.844
		1.585	3.534	0.3346	1.911
		1.609	3.86	1.516	3.332
		-0.5756	1.665	1.47	2.897
		1.609	2.942	1.138	2.039
		1.118	3.341	2.196	3.041
		0.9935	1.725	0.1388	2.611
		1.183	3.032	0.3796	3.157
		0.7321	1.905	1.373	2.609
		-0.1031	2.328	0.3796	2.583
		0.8568	2.884	0.8246	2.585
		1.015	1.576	0.517	5.17
		-0.1993	2.748	0.0014	2.818
		0.346	3.547	1.59	3.159
		-0.8084	2.303	1.064	4.149
		0.3115	3.146	1.705	2.938
		0.5955	2.938	1.727	2.018
		0.044	3.884	1.59	2.409
		-0.9406	2.593	1.118	0.044
		1.566	3.9	-0.4521	1.334
		0.24	3.081	1.423	2.764
		0.7146	2.034	1.015	3.392
		1.595	4.019	0.6608	0.7579
		-0.0725	3.977	0.0854	2.17
		0.346	3.759	-0.0277	1.945
		-0.1993	4.07	0.6425	0.8327
		1.637	4.261	0.7748	1.043
		-0.0277	2.539	1.036	1.949
		-0.1187	3.86	0.9642	3.265
		-0.4325	4.781	0.2762	3.549
		1.486	3.621	0.6425	1.856
		0.2642	4.19	0.8961	0.8246
		0.044	3.23	0.8568	1.423
		1.571	3.577	0.679	-0.4719
		0.0854	2.84	1.258	1.856
		0.3115	3.074	0.8164	1.804
		-0.8599	2.819	0.2642	3.007
		-0.7588	1.941	1.401	1.656
		0.1388	2.897	1.281	2.964
		-0.1828	2.428	1.561	1.723
		0.9343	2.441	1.221	1.609
		1.351	3.746	0.4552	1.674
		0.7233	4	0.9862	2.254
		-0.2845	3.405	0.4016	1.619
		0.2277	3.406	1.428	3.302
		1.029	3.052	0.8164	2.72
		1.47	3.602	-0.6416	2.444
		1.665	3.473	1.34	3.667
		0.9038	3.167	2.039	2.202
		0.2762	4.046	0.8488	2.431
		0.5955	4.709	0.5763	1.532
		-0.0574	3.582	0.8082	2.208
		0.3796	3.881	0.5069	4.186
		1.177	3.44	1.071	3.082
		-1.086	3.553	0.0014	3.186
		-0.1665	3.685	1.328	2.842
		-0.2845	3.242	0.3796	1.642
		1.27	3.224	1.651	2.939
		-0.1187	3.089	0.1519	1.982
		0.6425	4.266	0.2154	4.081
		1.345	3.754	-0.0425	1.692
		-0.394	3.51	-0.013	2.305
		0.5568	2.125	0.1124	1.561
		0.3231	2.578	1.078	1.092
		1.001	3.445	0.9716	2.441
		-0.2328	2.47	-0.6643	2.651
		0.1776	3.134	1.956	3.245
		0.4657	2.571	2.064	2.029
		1.276	3.21	0.6145	1.401
		0.4967	2.362	1.085	3.622
		0.547	2.278	1.434	1.595
		0.8327	2.685	1.804	2.081
		1.19	2.625	2.393	2.529
		1.522	3.612	2.05	2.029
		-0.0877	2.662	0.4865	2.949
		0.7579	3.818	0.2522	2.868
		-0.5125	2.892	0.3907	3.289
		-0.1187	3.825	0.6608	3.119
		1.112	2.483	2.299	3.651
		0.03	3.115	1.423	2.83
		-0.6643	3.243	1.057	2.984
		-0.4921	2.17	1.233	4.951
		0.4865	3.416	0.7664	3.013
		0.3573	4.513	0.6425	2.6
		0.099	3.303	1.86	3.325
		0.0854	3.069	0.7999	3.06
		1.138	4.405	-0.394	2.293
		1.05	3.688	1.647	3.094
		-0.8599	2.551	1.455	2.919
		-0.4521	3.561	0.9343	3.833
		0.8082	3.119	1.581	3.281
		-0.5756	3.269	2.475	3.61
		-0.4131	2.376	0.5069	3.693
		-0.5756	4.574	0.9568	2.549
		-0.2671	3.321	1.876	4.201
		0.044	3.099	0.7233	2.561
		0.9862	3.901	1.506	3.573
		-1.51	3.704	1.112	3.644
		0.0718	3.24	0.7146	2.681
		0.9493	3.674	1.637	2.217
		0.9343	3.294	0.7058	2.214
		0.3231	2.78	0.7233	3.011
		0.2029	3.574	1.264	3.623
		0.3115	3.139	1.47	3.018
		0.4865	4.216	0.6239	3.048
		1.665	4.302	1.071	-0.1187
		1.848	3.082	0.8246	-0.2498
		-1.248	4.064	1.022	-0.0877
		-0.3201	2.293	0.8883	2.254
		2.043	3.143	1.209	2.521
		0.8568	3.027	1.619	3.025
		-0.0725	2.917	1.171	0.8647
		1.868	1.628	1.029	2.529
		0.1388	3.46	0.7832	2.816
		-0.1993	2.888	0.7579	2.245
		-0.0725	3.329	1.546	3.894
		1.705	3.719	1.209	1.057
		-0.0877	2.412	0.8647	2.334
		-0.2671	3.967	0.8327	3.177
		0.6969	3.804	0.3907	2.224
		1.923	3.674	-0.6643	3.962
		1.351	3.63	0.0718	2.233
		0.3346	2.759	-0.0425	3.002
		1.506	2.395	1.245	2.844
		-0.013	1.993	0.6332	2.88
		0.2998	3.647	1.05	3.551
		-0.4325	3.486	0.9343	1.622
		-1.248	4.237	0.6608	2.175
		-0.2845	3.043	1.05	1.666
		0.6239	2.642	0.8164	2.318
		0.2277	3.259	0.517	2.345
		-0.8863	3.278	0.9568	2.601
		0.03	3.113	0.4233	2.803
		1.527	4.311	1.465	2.315
		-0.8339	3.448	1.138	1.868
		0.7579	4.308	0.3907	3.56
		1.941	1.605	0.4125	2.698
		0.9191	2.987	-0.2159	1.723
		0.7664	2.121	0.8164	2.332
		1.221	3.446	0.6425	3.506
		0.517	2.101	2.105	2.06
		1.27	2.919	0.3685	4.274
		1.595	2.941	0.2881	4.155
		1.401	3.521	1.276	3.287
		0.8805	3.872	1.449	2.949
		1.727	2.774	0.3796	2.193
		2.467	3.529	0.8164	2.376
		1.455	3.922	0.8883	1.971
		1.39	3.402	1.015	2.776
		1.832	3.645	1.029	1.808
		1.001	3.793	2.022	2.078
		1.439	4.014	0.9716	2.838
		0.7321	4.021	0.4233	3.334
		1.88	4.457	0.9191	0.5955
		0.8246	3.615	0.5069	1.692
		1.183	4.172	0.9268	3.126
		1.299	3.611	0.4233	2.431
		1.832	2.604	1.444	2.46
		1.791	3.256	2.227	1.138
		1.86	3.436	0.5568	1.476
		1.614	4.368	0.2998	1.832
		1.412	3.402	1.585	3.454
		1.379	4.397	1.264	2.566
		0.7999	2.154	1.276	3.041
		-0.3022	3.755	0.044	3.277
		1.085	3.144	1.88	1.401
		1.99	3.002	-0.0425	2.926
		1.396	3.636	-0.4131	1.766
		0.7407	2.884	1.001	3.274
		1.022	4.041	1.571	2.864
		-9.966	4.448	0.4552	2.224
		1.345	2.302	-0.2671	3.338
		0.8647	1.486	0.1903	2.651
		0.4552	2.39	0.9115	2.057
		1.215	1.93	2.337	2.607
		1.022	2.433	1.345	4.468
		0.3115	2.838	0.4233	2.866
		0.7664	2.554	0.8327	3.331
		1.064	2.521	2.734	2.69
		1.385	3.331	1.824	2.121
		0.099	2.331	1.868	2.154
		1.299	3.505	0.8164	2.766
		1.745	2.578	1.158	2.951
		1.227	3.139	1.537	2.526
		-0.5125	2.86	2.967	2.913
		1.791	3.636	1.138	3.242
		-9.966	3.17	2.607	3.136
		0.5859	3.786	2.091	2.776
		-9.966	3.729	2.926	2.687
		1.05	4.602	2.824	3.25
		-9.966	2.164	1.239	3.517
		0.346	2.848	3.045	3.059
		0.9935	4.22	1.145	2.595
		-0.5332	3.278	1.919	2.84
		2.208	3.433	2.183	2.356
		1.799	3.91	2.566	3.467
		0.2762	3.994	1.299	1.997
		-0.9132	3.016	2.501	3.323
		1.401	2.864	1.896	2.356
		1.39	3.59	2.393	3.946
		0.6699	3.239	2.806	2.616
		0.7999	2.892	2.236	3.397
		0.2998	3.436	2.609	2.278
		0.5568	2.971	2.694	2.529
		-0.2671	2.257	2.604	4.134
		-0.7346	3.315	1.532	2.417
		1.305	3.546	3.208	3.509
		0.3796	3.545	0.6699	2.899
		1.705	4.1	3.17	3.136
		0.1257	2.818	2.025	2.637
		0.9419	2.58	2.439	2.993
		-0.0574	3.214	2.356	3.06
		2.095	4.36	3.424	4.579
		0.4233	4.51	2.909	2.905
		0.4657	3.074	2.299	2.949
		1.719	3.563	2.29	2.81
		0.2881	2.874	1.888	3.109
		1.628	3.904	2.074	2.82
		0.5859	3.773	2.799	2.971
		2.17	3.373	1.465	3.284
		0.5763	2.86	-0.4131	2.58
		1.71	2.795	2.611	2.705
		0.1903	4.376	1.501	3.428
		1.036	3.272	2.491	2.148
		0.9191	4.562	2.393	3.505
		1.449	4.216	2.128	2.362
		1.317	3.535	2.088	3.698
		0.346	3.778	2.609	3.321
		0.8961	3.632	1.836	1.732
		0.1257	2.478	2.382	2.539
		1.317	2.862	2.436	3.018
		-0.3383	2.905	1.892	3.039
		-0.2845	4.026	2.387	3.365
		-0.3566	3.616	0.3685	3.98
		-0.8084	3.719	1.481	1.953
		1.151	3.822	0.8726	2.395
		0.5069	4.097	2.602	2.167
		0.9343	2.943	2.23	2.742
		0.8082	3.994	2.401	2.425
		1.561	2.901	2.816	2.348
		-0.1504	1.071	1.779	1.795
		1.609	4.164	1.417	1.656
		1.964	3.907	1.736	2.88
		0.3796	3.734	2.205	2.795
		0.8488	4.245	2.597	3.055
		0.2154	2.398	2.239	3.254
		-0.0425	3.123	1.836	2.628
		0.3907	3.889	2.884	2.266
		1.665	3.062	1.434	2.949
		1.59	1.379	1.701	3.524
		0.9642	2.671	2.18	3.828
		-0.0277	2.644	2.011	3.532
		-0.5973	1.74	1.34	3.079
		1.276	2.644	2.296	2.899
		-0.6416	2.764	2.922	3.469
		0.0718	2.387	1.787	2.84
		0.1903	3.05	0.6332	2.913
		0.5666	3.05	2.578	3.965
		1.281	3.46	2.382	2.761
		-0.9686	2.23	2.29	1.707
		-0.2498	2.118	1.465	3.065
		1.328	1.812	1.196	-0.4325
		-0.1828	3.964	0.605	2.128
		-0.8339	2.091	2.088	2.549
		-0.1345	3.982	0.6608	2.536
		0.0158	2.858	2.057	0.6933
		1.732	4.078	2.59	1.753
		0.6699	3.664	3.074	0.4016
		1.491	2.597	2.531	0.7146
		-0.3752	3.173	0.7493	1.872
		1.138	2.125	2.588	1.791
		-0.3383	1.964	3.465	1.373
		0.1124	0.5666	2.039	2.814
		1.88	2.011	1.9	2.17
		0.4447	3.17	1.576	2.141
		0.2522	1.628	0.4125	3.152
		1.623	3.326	1.227	2.221
		0.4016	1.439	1.252	2.561
		1.351	1.774	1.401	2.678
		-1.47	1.299	1.609	2.17
		1.158	3.442	0.8408	1.714
		-0.4131	4.259	1.164	2.356
		0.2277	3.778	0.4967	2.592
		0.0158	3.02	1.132	2.365
		1.036	2.616	1.001	2.801
		1.276	3.48	1.444	3.29
		-0.6193	3.436	1.945	3.039
		0.1124	3.323		1.74
		-0.6643	3.658		2.398
		-1.595	4.141		2.84
		-1.214	3.175		3.402
		-0.0277	4.249		2.669
		1.171	3.984		1.293
		-0.2159	3.857		3.059
		0.537	3.545		3.926
		-2.178	3.355		1.486
		0.3796	3.565		2.854
		-0.0277	2.205		2.328
		-0.1504	2.884		1.967
		0.8805	3.531		1.556
		1.561	2.39		1.971
		1.311	2.723		3.664
		0.2998	2.595		2.491
		1.964	3.213		3.181
		2.296	2.196		2.239
		1.926	2.081		3.412
		2.131	2.899		4.444
		4.363	2.993		2.799
		2.299	3.398		3.363
		2.37	3.791		2.098
		1.828	2.17		2.554
		2.725	3.898		2.193
		1.919	3.093		2.266
		2.115	3.365		3.143
		1.59	3.422		0.1519
		1.86	2.86		3.016
		2.578	3.676		2.452
		2.395	3.256		2.395
		1.979	3.561		2.892
		2.886	3.154		3.386
		2.278	2.534		3.522
		0.9038	3.571		1.804
		1.637	3.228		2.221
		1.779	3.662		1.774
		2.189	2.874		2.894
		2.362	3.453		2.095
		2.239	3.266		2.621
		1.923	3.41		2.551
		1.015	4.544		2.72
		2.365	5.054		2.053
		2.707	2.874		2.018
		2.549	3.824		1.96
		2.795	1.915		3.164
		2.131	4.457		-0.2671
		2.764	2.439		2.541
		2.86	3.233		3.297
		3.284	2.254		-0.013
		1.783	3.433		-0.0877
		2.705	3.191		2.015
		2.514	4.144		2.941
		3.046	4		1.9
		2.642	3.428		2.866
		2.46	2.549		3.089
		2.628	1.975		3.555
		2.269	2.011		2.025
		2.578	2.444		2.943
		1.86	2.707		2.356
		2.208	3.325		0.03
		2.69	3.846		2.876
		2.696	3.744		-0.2159
		2.499	2.602		1.245
		2.091	3.205		3.403
		0.7999	3.816		1.177
		3.126	3.963		2.621
			3.332		2.725
			2.616		3.968
			3.926		1.799
			2.703		-0.8339
			3.141		2.573
			3.067		3.37
			3.088		1.77
			4		0.6425
			2.108		2.534
			4.109		1.808
			3.362		2.658
			2.934		2.401
			2.922		3.016
			3.452		2.812
			3.754		1.945
			3.399		2.556
			4.279		2.457
			2.544		3.356
			4.109		2.546
			3.573		2.516
			3.442		1.001
					-0.0277
					3.336
					1.88
					3.89
					3.125
					2.025
					2.783
					2.425
					3.219
					-0.9132
					-0.2328
					2.373
					2.637
					3.643
					4.085
					3.17
					3.79
					2.628
					2.868
					2.759
					2.991
					3.707
					2.694
					2.556
					3.353
					3.822
					2.795
					2.718
					1.945
					3.029
					2.592
					3.572
					2.953
					2.692
					2.81
					2.611
					2.681
					2.876
					2.803
					2.376
					3.154
					3.959
					1.47
					2.852
					3.646
					4.006
					2.644
					3.39
					2.874
					2.354
					2.989
					3.365
					2.186
					3.621
					3.509
					2.662
					3.119
					2.135
					2.436
					3.247
					3.624
					2.87
					3.077
					3.088
					3.234
					3.23
					3.968
					3.144
					2.015
					1.39
					3.73
					4.088
					3.257
					2.578
					2.87
					2.319
					3.782
					2.154
					3.205
					1.967
					1.546
					1.417
					0.9493
					0.9268
					2.729
					2.379
					3.152
					1.896
					1.571
					4.002
					0.6608
					3.213
					2.131
					2.982
					2.008
					4.011
					0.9343
					2.521
					2.905
					0.8082
					2.778
					2.039
					1.196
					2.69
					2.938
					3.911
					2.23
					3.521
					1.979
					2.531
					2.17
					2.529
					2.977
					3.677
					2.806
					4.119
					3.28
					1.88
					0.9493
					2.499
					2.71
					2.956
					3.519
					3.064
					2.793
					3.03
					2.566
					2.649
					2.233
					2.78
					2.095
					1.766
					1.595
					1.723
					2.496
					0.7321
					1.112
					2.039
					2.199
					2.791
					2.359
					1.317
					2.118
					0.8805
					2.186
					2.359
					2.053
					1.293
					2.72
					2.095
					2.789
					3.162
					1.714
					1.93
					1.945
					2.909
					2.6
					2.173
					2.299
					2.864
					0.9642
					2.838
					2.621
					2
					2.356
					3.695
					2.384
					2.422
					3.492
					1.541
					2.611
					3.03
					2.559
					3.225
					2.417
					1.888
					2.824
					1.202
					2.125
					1.27
					0.4447
					2.278
					1.546
					2.29
					1.506
					2.921
					1.357
					2.465
					1.679
					2.186
					3.23
					3.445
					1.209
					3.882
					2.653
					2.834
					2.272
					1.334
					3.483
					2.362
					1.328
					2.915
					3.225
					2.308
					3.51
					2.379
					3.24
					1.496
					1.614
					2.101
					2.63
					1.245
					2.921
					2
					3.918
					2.6
					3.088
					1.522
					4.404
					2.111
					2.934
					1.239
					3.721
					3.845
					2.899
					1.34
					3.361
					3.483
					1.078
					1.6
					3.025
					2.425
					1.934
					2.656
					2.701
					4.133
					3.489
					2.82
					3.641
					2.539
					3.653
					1.975
					3.908
					2.692
					3.05
					3.208
					3.418
					3.175
					2.373
					2.322
					3.643
					2.82
					3.588
					2.795
					3.429
					3.521
					3.03
					3.531
					1.328
					2.727
					2.791
					2.84
					2.703
					2.561
					3.542
					2.658
					2.296
					3.744
					3.183
					3.032
					2.26
					2.964
					4.349
					2.111
					2.585
					2.036
					3.167
					2.578
					2.529
					0.4233
					2.899
					2.662
					0.6145
					1.512
					1.993
					0.6969
					1.9
					2.905
					3.118
					1.876
					2.382
					2.131
					2.173
					2.551
					3.011
					3.37
					2.242
					2.033
					2.008
					2.791
					2.772
					0.24
					2.82
					1.642
					1.412
					2.818
					3.452
					3.067
					1.688
					1.856
					1.145
					3.222
					1.196
					2.064
					2.576
					1.439
					2.322
					2.998
					2.433
					3.105
					2.607
					3.265
					0.5859
					2.23
					3.446
					3.424
					2.954
					3.512
					1.856
					3.944
					3.202
					1.444
					1.945
					1.379
					2.919
					1.903
					2.838
					2.96
					2.696
					2.539
					3.096
					2.095
					2.529
					3.101
					2.008
					2.828
					3.788
					2.431
					2.431
					2.987
					2.167
					2.401
					3.945
					1.945
					3.373
					3.216
					3.413
					2.491
					3.043
					2.561
					3.134
					2.63
					2.536
					2.759
					2.556
					3.402
					2.854
					3.297
					3.22
					3.326
					3.105
					3.164
					3.262
					3.356
					5.007
					2.872
					3.586
					4.346
					1.036
					3.208
					3.425
					4.231
					2.812
					3.888
					3.524
					2.616
					2.319
					1.934
					2.239
					4.011
					2.747
					1.938
					1.496
					0.9716
					3.839
					3.658
					3.684
					2.251
					2.359
					3.456
					3.257
					3.55
					1.705
					3.464
					2.356
					2.757
					2.559
					3.067
					2.725
					2.583
					3.022
					2.05
					2.334
					2.602
					3.458
					3.305
					2.173
					2.439
					3.441
					3.297
					0.4967
					3.546
					3.045
					2.694
					0.7664
					2.93
					2.836
					2.189
					3.192
					3.537
					3.45
					2.785
					0.8726
					3.096
					2.526
					2.043
					3.101
					1.783
					1.824
					3.677
					2.705
					4.089
					2.848
					2.662
					3.943
					3.029
					2.736
					3.018
					3.608
					3.25
					3.635
					3.079
					2.917
					2.516
					3.943
					2.936
					2.043
					2.87
					3.453
					3.342
					3.647
					3.303
					3.47
					2.882
					1.705
					0.8647
					1.008
					3.038
					2.018
					3.3
					1.105
					1.903
					2.436
					3.032
					1.719
					3.06
					2.958
					2.266
					2.967
					3.512
					3.744
					3.29
					1.688
					2.339
					0.7916
					2.876
					1.856
					1.022
					0.9789
					2.751
					2.524
					2.098
					0.7058
					1.949
					0.8246
					3.157
					1.406
					2.029
					1.158
					1.997
					2.208
					0.3346
					1.276
					4.341
					3.358
					3.497
					2.409
					2.894
					3.68
					1.516
					1.701
					2.339
					2.478
					1.852
					2.161
					2.135
					2.199
					2.053
					2.559
					2.475
					3.306
					2.705
					2.694
					3.294
					4.105
					2.712
					2.93
					2.308
					2.58
					3.751
					2.217
					1.439
					3.136
					2.911
					3.912
					2.483
					4.498
					3.745
					2.387
					2.46
					1.022
					1.527
					2.373
					2.797
					2.588
					3.754
					3.995
					2
					2.48
					2.173
					3.134
					2.248
					3.02
					2.17
					1.164
					2.008
					1.787
					-0.5332
					2.342
					-1.056
					0.2642
					0.5568
					2.401
					2.236
					0.7579
					3.259
					3.671
					3.18
					1.903
					4.431
					3.228
					2.227
					3.133
					0.7321
					1.008
					3.126
					3.731
					2.414
					2.325
					3.108
					2.088
					1.683
					2.924
					2.217
					3.268
					1.856
					2.736
					3.105
					2.064
					2.183
					3.219
					2.698
					2.834
					3.125
					2.806
					2.876
					1.506
					2.18
					4.36
					2.751
					2.275
					1.486
					2.331
					2.876
					3.809
					0.7748
					3.213
					3.071
					2.125
					3.225
					1.132
					0.1776
					0.4552
					0.2522
					0.099
					0.9038
					2.368
					2.997
					1.098
					0.9115
					3.568
					2.029
					0.5069
					2.917
					1.305
					2
					1.449
					1.774
					0.044
					2.039
					0.6332
					2.23
					2.932
					1.34
					2.77
					0.8726
					1.758
					1.774
					3.496
					1.93
					2.345
					2.559
					4.096
					1.683
					1.824
					0.5859
					0.6517
					2.339
					1.537
					1.787
					0.7146
					-0.1345
					3.165
					1.576
					2.511
					-0.8084
					1.808
					0.5666
					0.7233
					2.47
					2.678
					2.299
					1.609
					2.351
					2.716
					2.917
					2.764
					2.991
					-0.1504
					2.592
					1.401
					1.585
					1.258
					3.55
					1.848
					2.924
					2.101
					1.158
					0.7493
					1.496
					0.1124
					3.552
					3.111
					4.294
					3.059
					0.9568
					2.115
					2.266
					1.373
					3.242
					1.77
					2.947
					3.186
					1.486
					2.978
					2.978
					2.571
					2.886
					4.28
					2.554
					1.571
					2.125
					2.585
					1.964
					0.5955
					2.275
					0.7146
					0.4657
					2.997
					1.945
					0.2154
					2.473
