# Supplementary material for: Phenotypic profiling of solute carriers characterizes serine transport in cancer
Source: Nat Metab. 2023 Dec 8;5(12):2148–68. doi: 10.1038/s42255-023-00936-2 (PMC10730406; doi:10.1038/s42255-023-00936-2)
Supplement: Supplementary file 15 — Statistical source data related to Extended Data Fig. 6. [file 42255_2023_936_MOESM15_ESM.xlsx]

## Sheet: ED Fig 6 b
		Extended Data Fig. 6b
		mRNA Cell line	NTC1/2			SLC6A14/SLC12A4 gRNA			SLC6A14/SLC25A15_A gRNA			SLC6A14/SLC25A15_B gRNA
		SLC6A14	1	1	1	0.461	0.645	0.66	0.105	0.307	0.311	0.238	0.268	0.406
		SLC12A4	1	1	1	0.473	0.334	0.436
		SLC25A15	1	1	1				0.439	0.416	0.613	0.467	0.459	0.378

## Sheet: ED Fig 6 c
		Extended Data Fig. 6c
		Time (Hr) Cell line	NTC1/2			SLC6A14/SLC12A4 gRNA
		0	0.99734	0.929839	1.07282	0.912063	0.969918	1.11802
		24	3.19884	3.17739	3.33659	2.94963	2.7736	2.36504
		48	4.71552	4.30096	3.68809	3.05942	4.31817	3.25052
		72	4.98121	5.03693	4.55121	3.50473	3.66288	3.94579
		Time (Hr) Cell line	NTC1/2			SLC6A14/SLC25A15 gRNA
		0	0.999153	0.978959	1.02189	1.04146	0.958184	1.00036
		24	2.26057	2.69521	2.5572	1.43674	1.91172	1.80486
		48	6.65785	5.8462	6.37741	4.53395	6.13796	4.65082
		72	8.53981	8.32556	7.94307	8.76912	6.40064	7.8213

## Sheet: ED Fig 6 d
		Extended Data Fig. 6d
		No DOX, no FACS					FACS, GFPneg					FACS, GFPpos
		NTC1/2_A	SLC6A14/12A4	NTC1/2_B	SLC6A14/25A15_A	SLC6A14/25A15_B	NTC1/2_A	SLC6A14/12A4	NTC1/2_B	SLC6A14/25A15_A	SLC6A14/25A15_B	NTC1/2_A	SLC6A14/12A4	NTC1/2_B	SLC6A14/25A15_A	SLC6A14/25A15_B
		29.757	28.127	27.716	29.088	30.176	26.236	22.415	24.068	22.456	19.804	24.898	12.475	26.663	15.861	19.264
		25.539	29.519	27.574	29.122	30.244	34.889	23.29	24.273	18.85	18.474	25.044	13.096	26.02	15.512	17.246
		28.634	28.34	27.713	28.82	29.99	36.159	23.782	24.352	22.985	20.615	23.43	13.461	28.493	16.973	17.307

## Sheet: ED Fig 6 e
		Extended Data Fig. 6e
		Time (Weeks)	HCT116 PHGDH KO_SLC6A14/SLC25A15_NoDOX									HCT116 PHGDH KO_SLC6A14/SLC25A15_+DOX
			GCBA5.9h	GCBA5.9b	GCBA5.9e	GCBA5.9g	GCBA5.9q	GCBA5.9s	GCBA5.9o	GCBA5.9u	GCBA5.9v	GCBA5.9i	GCBA5.9j	GCBA5.9p	GCBA5.9r	GCBA5.9t	GCBA5.9a	GCBA5.9f	GCBA5.9k	GCBA5.9l	GCBA5.9n	GCBA5.9c
		0	100	100	100	100	100	100	100	100	100	100	100	100	100	100	100	100	100	100	100	100
		1	164.2	166.1	133	170.7	68.9	227.2	80.7	47	103	92.3	86.1	74.7	56.3	96.9	73	133.2	127.6	138.9	96	49.9
		2	284	716.1	227.6	396.4	94.6	220.9	200.1	54.6	215.9	61.4	75.7	152.8	50.6	180.4	138.7	180.4	200.3	270.3	177.7	58.9
		3		1073.6	406.7	529.2	129.4	402.3	314.2	108.7	435.5	70.3	86.6	271.5	47	295.7	327.2	1216.3	324.3	544.3	381	84.8
		4		1526.7	749.2	653.4	221.9	602.1	450.5	287	643.9	166.8	168.9	632.9	52.1	454.9	605.6		663.6	940	686	97.4
		Mice	Days on DOX	PHGDH_KO - SLC6A14_SLC25A15 No DOX	PHGDH_KO - SLC6A14_SLC25A15 + DOX
		GCBA5.9h	9	1
		GCBA5.9b	23	1
		GCBA5.9e	23	1
		GCBA5.9g	21	1
		GCBA5.9q	49	1
		GCBA5.9s	33	1
		GCBA5.9o	32	1
		GCBA5.9u	32	1
		GCBA5.9v	24	1
		GCBA5.9i	53		1
		GCBA5.9j	37		1
		GCBA5.9p	32		1
		GCBA5.9r	93		1
		GCBA5.9t	25		1
		GCBA5.9a	33		1
		GCBA5.9f	16		1
		GCBA5.9k	35		1
		GCBA5.9l	31		1
		GCBA5.9n	25		1
		GCBA5.9c	82		1

## Sheet: ED Fig 6 f
		Extended Data Fig. 6f
		NTC -DOX	NTC +DOX	SLC6A14/12A4 gRNAs -DOX	SLC6A14/12A4 gRNAs +DOX	SLC6A14/25A15 gRNAs -DOX	SLC6A14/25A15 gRNAs +DOX
		0.862617	0.637982	0.590761	0.916445	0.795524	0.929327
		0.892562	0.980472	1.7439	0.632772	0.95258	0.770639
		0.907993	1.12825	0.964263	0.638339	0.789445	0.593471
		0.82479	1.02668	0.993715	0.702974	0.696759	0.693447
		0.833153	0.773063	0.564969	0.552463	0.851364	0.461001
		0.603242	0.853762	0.825518	1.00815	0.548233	0.876159

## Sheet: ED Fig 6 g
		Extended Data Fig. 6g
		NTC -DOX	NTC +DOX	SLC6A14/12A4 gRNAs -DOX	SLC6A14/12A4 gRNAs +DOX	SLC6A14/25A15 gRNAs -DOX	SLC6A14/25A15 gRNAs +DOX
		0.831158	0.77408	1.06307	1.14729	1.26214	1.20777
		0.706878	1.01715	0.77698	0.961741	0.950492	0.869714
		0.827142	0.559304	1.02699	0.694024	1.01208	0.746429
		0.747483	0.743626	1.0755	0.553629	0.83972	0.650085
		0.753756	0.726171	1.13178	1.23452	1.11926	0.87273
		0.840468	1.07043	0.839674	0.880695	0.670041	0.899145

## Sheet: ED Fig 6 h
		Extended Data Fig. 6h
		Relative Abundance Value	NTC Minus DOX						NTC Plus DOX						SLC6A14/12A4 gRNA Minus DOX						SLC6A14/12A4 gRNA Plus DOX						SLC6A14/25A15 gRNA Minus DOX						SLC6A14/25A15 gRNA Plus DOX
		Alanine (L-)	1.1339	1.12382	1.23533	0.997328	1.07224	0.831471	1.06965	1.10346	1.23856	0.702469	1.1189	0.828926	0.764403	0.39929	1.28503	0.923572	0.700282	0.979383	0.811986	0.566678	0.771192	0.809564	0.565878	0.878173	0.85097	1.11991	0.785566	0.770977	0.815416	0.805253	0.468047	0.937539	0.520287	0.846078	0.634657	0.669742
		Arginine (L-)	1.05057	0.533135	1.14134	1.03769	0.629927	0.438745	0.966304	1.3196	1.3572	0.766859	0.930852	0.612879	0.65907	0.899496	1.2167	0.914591	0.716699	0.973877	0.849092	0.595863	0.555454	0.83749	0.660855	0.883675	0.830643	1.26448	0.996722	0.644303	0.928605	0.728612	0.80298	0.91784	0.419705	0.967862	0.479321	0.58106
		Asparagine (L-)	0.0246919	0.0191887	0.0234817	0.0283345	0.0184635	0.0189544	0.0233213	0.022713	0.0198021	0.0120045	0.0191496	0.0215356	0.0179161	0.0310057	0.0204931	0.0235955	0.0124929	0.0176263	0.0218955	0.0158049	0.0157338	0.0170794	0.01172	0.0153625	0.0236131	0.0223513	0.0166132	0.0137441	0.0179662	0.0170256	0.0148477	0.0232205	0.0208388	0.0115702	0.0171914	0.0140782
		Aspartic acid (L-)	0.321865	0.286414	0.36153	0.234048	0.311582	0.235702	0.255636	0.357594	0.387502	0.288446	0.322713	0.231019	0.18531	0.159492	0.344139	0.244098	0.29521	0.293168	0.256731	0.155695	0.241544	0.253471	0.201438	0.330101	0.173202	0.446286	0.220069	0.206617	0.255117	0.180264	0.175708	0.215814	0.126886	0.299131	0.158913	0.313988
		Glucose (D)	0.277992	0.12308	0.293456	0.260704	0.122295	0.109414	0.257552	0.183773	0.186902	0.104672	0.14702	0.124406	0.121025	0.07038	0.278781	0.0950861	0.0907909	0.189906	0.0873363	0.0561618	0.13207	0.104248	0.0753006	0.141755	0.216223	0.254393	0.144573	0.129338	0.0832468	0.175675	0.0515893	0.288529	0.0619321	0.150179	0.105965	0.0571615
		Glutamic acid (L-)	1.61754	1.67565	1.75823	1.38067	1.62211	1.48193	1.43878	1.57231	1.87019	1.43037	1.64079	1.36547	1.16665	0.755612	1.97206	1.33046	1.20319	1.43494	1.29769	0.935018	1.03212	1.20229	1.00826	1.72844	1.06372	1.73923	1.07316	1.26653	1.22231	1.06661	0.813997	1.3481	0.781567	1.41007	0.832389	1.27374
		Glutamine (L-)	2.60683	1.96772	3.19204	1.85311	1.51254	1.72543	2.20277	2.34828	2.62369	1.71087	2.02438	1.49902	1.37171	1.84144	2.73497	1.64266	1.76104	2.08349	1.10454	0.89476	1.04536	1.57265	1.21091	1.85633	1.91039	2.80474	1.61137	1.59794	1.55247	1.85352	1.30508	1.87232	1.01074	1.11192	1.55127	1.84741
		Glycine	0.0664033	0.0628988	0.0672167	0.0543829	0.0672659	0.0463587	0.0569265	0.0719992	0.0561484	0.0386432	0.0612493	0.0461818	0.0353554	0.0194847	0.0769704	0.0442313	0.0334232	0.0579755	0.041384	0.0237691	0.0381641	0.0412307	0.0250643	0.0435671	0.0537683	0.0797189	0.0438579	0.0479523	0.0464322	0.0572509	0.0293628	0.0463219	0.027188	0.0513313	0.037278	0.0292855
		Isoleucine (L-)	0.865472	0.894093	0.910664	0.82479	0.834434	0.603242	0.641925	0.980472	1.12773	1.02726	0.773063	0.854686	0.590761	1.74495	0.961332	0.997747	0.564495	0.825737	0.917942	0.630425	0.641393	0.703777	0.55451	1.00815	0.796283	0.955366	0.788926	0.698727	0.855594	0.548233	0.930388	0.770639	0.593471	0.693447	0.463573	0.878006
		Lactic acid (L-)	3.10945	4.30279	2.7839	1.45377	0.933733	0.549163	3.76024	1.8058	4.88551	2.81452	3.92855	2.48505	2.4697	1.34176	4.52045	1.55128	2.17366	0.613526	0.469047	1.97182	1.18821	2.75295	2.50674	0.957783	3.24484	3.84199	2.80077	2.57214	2.25231	2.80748	2.41272	2.92688	2.11483	3.13972	2.27434	1.8501
		Lysine (L-)	0.497324	0.390306	0.510543	0.520612	0.319641	0.374196	0.530593	0.521157	0.575995	0.45715	0.413614	0.383799	0.429019	0.339894	0.458532	0.486352	0.35043	0.372844	0.398162	0.280503	0.352935	0.311468	0.298276	0.358434	0.457177	0.546712	0.389412	0.333896	0.449151	0.367338	0.427498	0.449328	0.344446	0.464959	0.284466	0.365404
		Methionine (L-)	0.546124	0.579415	0.54498	0.462642	0.462636	0.318155	0.464812	0.555243	0.644681	0.511737	0.527323	0.433354	0.325163	0.560657	0.524998	0.52043	0.314059	0.482516	0.499897	0.325917	0.341012	0.373511	0.304303	0.443602	0.430076	0.57839	0.431075	0.366002	0.510137	0.37199	0.423119	0.433765	0.321898	0.433804	0.267463	0.439481
		Ornithine	0.0902542	0.217167	0.0763178	0.0961429	0.0879049	0.151675	0.10707	0.108399	0.167662	0.245336	0.0725851	0.164877	0.0892431	0.140128	0.112253	0.211787	0.0828608	0.0758976	0.138333	0.151277	0.141723	0.100675	0.100971	0.155448	0.0844856	0.0742	0.113876	0.130627	0.0662032	0.0421875	0.302513	0.0581466	0.182051	0.078516	0.0876306	0.223108
		Phenylalanine (L-)	0.718244	0.679079	0.73373	0.607259	0.741402	0.478179	0.567755	0.792353	0.923984	0.761323	0.641082	0.595012	0.49007	0.881884	0.863546	0.720914	0.47438	0.667581	0.646467	0.437732	0.505126	0.593792	0.39316	0.69599	0.567514	0.854951	0.637419	0.538164	0.6545	0.485351	0.628598	0.617504	0.442872	0.582296	0.40995	0.673899
		Proline (L-)	11.7216	13.2149	14.0584	11.1569	10.8322	9.57685	11.0185	11.2688	14.1593	8.53687	11.5389	10.0396	8.40709	2.76387	15.182	11.4053	6.61823	9.69652	8.8845	5.45302	8.90043	8.09497	6.21215	9.5513	9.65129	12.0361	8.79208	8.09899	8.16749	8.7844	5.94149	10.4188	5.59127	10.5391	6.32276	7.29959
		Threonine (L-)	0.19064	0.272617	0.233697	0.179259	0.182121	0.127407	0.220231	0.256732	0.238539	0.180252	0.193858	0.186333	0.145417	0.159784	0.232597	0.222932	0.131703	0.229393	0.237452	0.177568	0.130452	0.16285	0.161058	0.1536	0.145371	0.193431	0.176153	0.119387	0.144706	0.128947	0.192991	0.16406	0.164461	0.160849	0.11364	0.177929
		Tyrosine (L-)	0.263484	0.246734	0.267675	0.272507	0.276392	0.146073	0.293097	0.303776	0.340366	0.217749	0.263764	0.232371	0.159791	0.206514	0.289133	0.21569	0.145423	0.270367	0.22313	0.149535	0.17615	0.21276	0.150738	0.25547	0.188903	0.294601	0.250112	0.191919	0.210319	0.179607	0.193545	0.213462	0.159968	0.224594	0.148012	0.163934
		Valine (L-)	0.76576	0.835116	0.698681	0.825258	0.76489	0.537935	0.644371	0.7698	0.936418	0.734768	0.749314	0.731732	0.543735	0.663595	0.843513	0.953648	0.427999	0.701824	0.774207	0.443567	0.562906	0.545969	0.460477	0.719904	0.541182	0.788768	0.688387	0.540502	0.667075	0.456584	0.765381	0.544276	0.512922	0.668651	0.407585	0.576526
		LOG10	NTC Minus DOX						NTC Plus DOX						SLC6A14/12A4 gRNA Minus DOX						SLC6A14/12A4 gRNA Plus DOX						SLC6A14/25A15 gRNA Minus DOX						SLC6A14/25A15 gRNA Plus DOX
		Alanine (L-)	0.0545737	0.050696	0.0917841	-0.00116179	0.0302917	-0.0801527	0.0292433	0.0427571	0.092916	-0.153373	0.0487923	-0.0814843	-0.116678	-0.398712	0.108913	-0.0345294	-0.154727	-0.00904749	-0.0904513	-0.246664	-0.112837	-0.0917487	-0.247277	-0.0564201	-0.0700859	0.0491842	-0.104817	-0.112958	-0.0886209	-0.0940674	-0.32971	-0.0280106	-0.283757	-0.0725898	-0.197461	-0.174093
		Arginine (L-)	0.0214259	-0.273163	0.0574157	0.016067	-0.20071	-0.357788	-0.0148864	0.120442	0.132645	-0.115284	-0.0311191	-0.212625	-0.181068	-0.0460007	0.0851825	-0.0387729	-0.144663	-0.0114957	-0.0710452	-0.224854	-0.255352	-0.0770205	-0.179894	-0.0537072	-0.0805856	0.101912	-0.00142614	-0.19091	-0.032169	-0.137504	-0.0952951	-0.0372328	-0.377056	-0.0141864	-0.319374	-0.235779
		Asparagine (L-)	-1.60745	-1.71695	-1.62927	-1.54768	-1.73369	-1.72229	-1.63225	-1.64373	-1.70329	-1.92066	-1.71784	-1.66684	-1.74676	-1.50856	-1.68839	-1.62717	-1.90334	-1.75384	-1.65965	-1.80121	-1.80317	-1.76753	-1.93107	-1.81354	-1.62685	-1.6507	-1.77955	-1.86188	-1.74554	-1.7689	-1.82834	-1.63413	-1.68113	-1.93666	-1.76469	-1.85145
		Aspartic acid (L-)	-0.492326	-0.543005	-0.441856	-0.630695	-0.506427	-0.627636	-0.592378	-0.446609	-0.411726	-0.539936	-0.491184	-0.636353	-0.7321	-0.797261	-0.463266	-0.612435	-0.529869	-0.532884	-0.590522	-0.807725	-0.617003	-0.596072	-0.695858	-0.481353	-0.761447	-0.350386	-0.657441	-0.684833	-0.593261	-0.744092	-0.755209	-0.66592	-0.896588	-0.524139	-0.79884	-0.503087
		Glucose (D)	-0.555968	-0.909812	-0.532457	-0.583852	-0.91259	-0.960928	-0.589135	-0.735718	-0.728387	-0.980169	-0.832623	-0.905157	-0.917123	-1.15255	-0.554737	-1.02188	-1.04196	-0.721462	-1.05881	-1.25056	-0.879196	-0.981934	-1.1232	-0.848462	-0.665099	-0.594495	-0.839912	-0.888273	-1.07963	-0.755289	-1.28744	-0.539811	-1.20808	-0.82339	-0.974838	-1.2429
		Glutamic acid (L-)	0.208854	0.224184	0.245076	0.140091	0.21008	0.170827	0.157994	0.196538	0.271886	0.155448	0.215054	0.135283	0.0669417	-0.121701	0.294919	0.124002	0.0803339	0.156833	0.113171	-0.0291802	0.0137309	0.0800094	0.00357075	0.237653	0.0268263	0.240356	0.0306638	0.102615	0.0871806	0.0280043	-0.0893774	0.129722	-0.107034	0.14924	-0.0796736	0.105081
		Glutamine (L-)	0.416113	0.293964	0.504068	0.267902	0.179706	0.236896	0.342969	0.370751	0.418912	0.233218	0.306293	0.175807	0.137264	0.265157	0.436953	0.215548	0.245768	0.318791	0.0431802	-0.0482935	0.0192655	0.196633	0.0831108	0.268654	0.281121	0.447893	0.207196	0.203561	0.191023	0.267998	0.115638	0.272381	0.00463892	0.0460739	0.190686	0.266564
		Glycine	-1.17781	-1.20136	-1.17252	-1.26454	-1.17221	-1.33387	-1.24469	-1.14267	-1.25066	-1.41293	-1.2129	-1.33553	-1.45154	-1.71031	-1.11368	-1.35427	-1.47595	-1.23676	-1.38317	-1.62399	-1.41834	-1.38478	-1.60094	-1.36084	-1.26947	-1.09844	-1.35795	-1.31919	-1.33318	-1.24222	-1.5322	-1.33421	-1.56562	-1.28962	-1.42855	-1.53335
		Isoleucine (L-)	-0.062747	-0.0486172	-0.0406417	-0.0836567	-0.078608	-0.219509	-0.192515	-0.0085648	0.0522057	0.0116803	-0.111785	-0.0681932	-0.228588	0.241784	-0.0171265	-0.000979717	-0.24834	-0.083158	-0.0371847	-0.200367	-0.192876	-0.152565	-0.25609	0.00352389	-0.0989325	-0.0198302	-0.102964	-0.155692	-0.0677324	-0.261035	-0.0313361	-0.113149	-0.2266	-0.158987	-0.333882	-0.0565026
		Lactic acid (L-)	0.492684	0.633751	0.444654	0.162496	-0.0297771	-0.260299	0.575216	0.25667	0.68891	0.449404	0.594232	0.395335	0.392644	0.127675	0.655182	0.190691	0.337191	-0.212167	-0.328784	0.294868	0.0748939	0.439798	0.399109	-0.0187328	0.511193	0.584556	0.447277	0.410295	0.352628	0.448316	0.382507	0.466406	0.325275	0.496891	0.356855	0.267195
		Lysine (L-)	-0.303361	-0.408594	-0.291968	-0.283486	-0.495338	-0.4269	-0.275238	-0.283031	-0.239581	-0.339941	-0.383405	-0.415896	-0.367524	-0.468657	-0.338631	-0.31305	-0.455399	-0.428472	-0.39994	-0.552062	-0.452306	-0.506587	-0.525382	-0.445591	-0.339915	-0.262241	-0.409591	-0.476389	-0.347607	-0.434934	-0.369066	-0.347436	-0.462879	-0.332586	-0.54597	-0.437227
		Methionine (L-)	-0.262709	-0.23701	-0.263619	-0.334755	-0.334761	-0.497361	-0.332723	-0.255517	-0.190655	-0.290953	-0.277923	-0.363157	-0.487898	-0.251302	-0.279842	-0.283638	-0.502989	-0.316488	-0.30112	-0.486893	-0.467231	-0.427697	-0.516694	-0.353007	-0.366455	-0.237779	-0.365447	-0.436517	-0.292313	-0.429468	-0.373538	-0.362745	-0.492282	-0.362707	-0.572736	-0.35706
		Ornithine	-1.04453	-0.663206	-1.11737	-1.01708	-1.05599	-0.819086	-0.970332	-0.964976	-0.775565	-0.610238	-1.13915	-0.78284	-1.04943	-0.853474	-0.9498	-0.674101	-1.08165	-1.11977	-0.859073	-0.820228	-0.848561	-0.997077	-0.995804	-0.808416	-1.07322	-1.1296	-0.943567	-0.883968	-1.17912	-1.37482	-0.519256	-1.23548	-0.739808	-1.10504	-1.05734	-0.651485
		Phenylalanine (L-)	-0.143728	-0.168079	-0.134464	-0.216626	-0.129946	-0.320409	-0.245839	-0.101081	-0.0343356	-0.118431	-0.193086	-0.225474	-0.309742	-0.0545884	-0.0637147	-0.142117	-0.323874	-0.175496	-0.189454	-0.358792	-0.296601	-0.226365	-0.405431	-0.157397	-0.246023	-0.068059	-0.195575	-0.269086	-0.184091	-0.313944	-0.201627	-0.20936	-0.353722	-0.234856	-0.387269	-0.171405
		Proline (L-)	1.06899	1.12107	1.14793	1.04754	1.03472	0.981223	1.04212	1.05188	1.15104	0.931299	1.06217	1.00172	0.924646	0.441517	1.18133	1.05711	0.820742	0.986616	0.948633	0.736637	0.949411	0.908215	0.793242	0.980062	0.984585	1.08049	0.944092	0.908431	0.912089	0.943712	0.773895	1.01782	0.747511	1.0228	0.800907	0.863299
		Threonine (L-)	-0.719787	-0.564446	-0.631347	-0.746518	-0.739639	-0.894807	-0.657122	-0.590521	-0.622441	-0.744121	-0.712515	-0.729709	-0.837384	-0.796467	-0.633395	-0.651828	-0.880404	-0.63942	-0.624425	-0.750634	-0.88455	-0.788213	-0.793019	-0.813609	-0.837521	-0.713475	-0.75411	-0.923044	-0.839513	-0.88959	-0.714462	-0.784997	-0.783937	-0.793582	-0.944471	-0.749753
		Tyrosine (L-)	-0.579245	-0.607771	-0.572391	-0.564623	-0.558475	-0.83543	-0.532989	-0.517447	-0.468054	-0.662043	-0.578784	-0.633819	-0.796449	-0.68505	-0.538903	-0.66617	-0.837367	-0.568046	-0.651441	-0.825257	-0.754117	-0.67211	-0.821778	-0.592661	-0.723761	-0.530766	-0.601865	-0.716881	-0.677122	-0.745678	-0.713219	-0.670679	-0.795966	-0.648603	-0.829702	-0.785331
		Valine (L-)	-0.115907	-0.0782533	-0.155721	-0.0834104	-0.116401	-0.26927	-0.190864	-0.113622	-0.0285301	-0.13385	-0.125336	-0.135648	-0.264613	-0.178097	-0.0739083	-0.0206121	-0.368557	-0.153772	-0.111143	-0.353041	-0.249564	-0.262832	-0.336792	-0.142725	-0.266657	-0.103051	-0.162167	-0.267202	-0.175825	-0.34048	-0.116122	-0.264181	-0.289949	-0.1748	-0.389782	-0.239181
		ANTILOG	NTC Minus DOX						NTC Plus DOX						SLC6A14/12A4 gRNA Minus DOX						SLC6A14/12A4 gRNA Plus DOX						SLC6A14/25A15 gRNA Minus DOX						SLC6A14/25A15 gRNA Plus DOX
		Alanine (L-)	1.05609	1.052	1.09613	0.998839	1.03076	0.922975	1.02968	1.04368	1.09737	0.85781	1.05	0.921747	0.889872	0.671184	1.11507	0.96606	0.856649	0.990993	0.913519	0.781403	0.893296	0.912334	0.780924	0.945142	0.932314	1.05041	0.900489	0.893188	0.915192	0.910221	0.719132	0.972378	0.752949	0.929982	0.820812	0.840219
		Arginine (L-)	1.02166	0.760969	1.0591	1.0162	0.81815	0.699222	0.985224	1.128	1.14184	0.891113	0.96936	0.808459	0.834378	0.955041	1.08892	0.961969	0.865314	0.98857	0.93142	0.798633	0.774644	0.925871	0.835359	0.94771	0.922576	1.10729	0.998575	0.826207	0.968343	0.871531	0.909105	0.963452	0.685878	0.985914	0.726604	0.789956
		Asparagine (L-)	0.200399	0.179612	0.196073	0.21274	0.176632	0.178657	0.19549	0.193259	0.182084	0.146511	0.179453	0.188842	0.174339	0.221229	0.184816	0.196485	0.14907	0.173108	0.190206	0.165099	0.164776	0.170754	0.144993	0.163076	0.196548	0.191916	0.168715	0.15538	0.17455	0.170521	0.16068	0.195122	0.186164	0.144185	0.17124	0.157009
		Aspartic acid (L-)	0.611203	0.581	0.642842	0.532222	0.602645	0.533852	0.553011	0.639794	0.662506	0.582785	0.611902	0.529219	0.480898	0.450561	0.629225	0.542029	0.588682	0.58691	0.554038	0.445871	0.539559	0.550972	0.498646	0.617947	0.46699	0.704416	0.518176	0.504174	0.552522	0.475166	0.469912	0.513801	0.407959	0.592065	0.449851	0.604661
		Glucose (D)	0.573517	0.4026	0.58716	0.557746	0.401483	0.382538	0.554807	0.479161	0.482687	0.375248	0.434907	0.404478	0.399667	0.31583	0.574224	0.359917	0.352763	0.486041	0.34687	0.286345	0.415117	0.374586	0.325237	0.428073	0.514223	0.551841	0.431749	0.411366	0.33972	0.469875	0.275976	0.582858	0.298769	0.438941	0.377254	0.288547
		Glutamic acid (L-)	1.23226	1.2513	1.27772	1.15038	1.23378	1.18629	1.17116	1.21718	1.31244	1.16818	1.23993	1.14486	1.06923	0.885413	1.34302	1.13202	1.08365	1.1698	1.11982	0.971241	1.01383	1.0833	1.00358	1.26827	1.02719	1.2717	1.03114	1.10807	1.09109	1.0284	0.9145	1.13851	0.898495	1.16095	0.923418	1.1108
		Glutamine (L-)	1.51606	1.34174	1.65544	1.30722	1.19686	1.26731	1.40913	1.44882	1.52031	1.26266	1.35838	1.19221	1.14713	1.30364	1.54798	1.24054	1.2786	1.37546	1.04413	0.952854	1.01945	1.2173	1.08666	1.3082	1.32461	1.56501	1.23022	1.22576	1.21049	1.30734	1.12259	1.31309	1.00465	1.04715	1.21008	1.30547
		Glycine	0.307952	0.300785	0.309585	0.28237	0.309683	0.263456	0.288032	0.318965	0.286315	0.24343	0.297334	0.263019	0.234208	0.18081	0.32835	0.258136	0.228561	0.290325	0.250783	0.197111	0.242114	0.250379	0.201706	0.256445	0.28098	0.333391	0.257187	0.267352	0.263637	0.288743	0.216059	0.263365	0.208958	0.275376	0.239657	0.215812
		Isoleucine (L-)	0.939181	0.952546	0.960173	0.919747	0.924402	0.802913	0.824882	0.991472	1.05359	1.01175	0.894236	0.93408	0.795656	1.27352	0.983019	0.999021	0.780095	0.920206	0.963498	0.818431	0.824585	0.858503	0.774072	1.00353	0.905804	0.980365	0.90216	0.855822	0.934511	0.770254	0.96915	0.893018	0.797239	0.853008	0.716138	0.945064
		Lactic acid (L-)	1.6367	1.88467	1.55995	1.17644	0.970662	0.770821	1.77751	1.29262	1.99154	1.56738	1.81164	1.48488	1.48089	1.13618	1.92549	1.21009	1.40101	0.808829	0.719799	1.34295	1.07777	1.55239	1.4905	0.981442	1.66728	1.79419	1.56405	1.50726	1.4228	1.56567	1.46596	1.59425	1.38441	1.6436	1.42883	1.30629
		Lysine (L-)	0.738333	0.664584	0.746793	0.753154	0.609365	0.652529	0.759391	0.753496	0.786957	0.711812	0.681537	0.659749	0.692447	0.625842	0.712746	0.731214	0.634195	0.651504	0.67036	0.575761	0.63616	0.602548	0.591329	0.640445	0.711831	0.769326	0.663922	0.621022	0.706376	0.647307	0.69138	0.706497	0.629469	0.717067	0.57928	0.645825
		Methionine (L-)	0.768966	0.788983	0.768266	0.715513	0.715509	0.608133	0.716969	0.774516	0.826418	0.747551	0.757355	0.695477	0.613915	0.777787	0.755903	0.753039	0.604721	0.728704	0.739989	0.614533	0.626735	0.652009	0.596489	0.702572	0.693187	0.788377	0.693886	0.646284	0.746535	0.650855	0.688295	0.695764	0.61123	0.69579	0.56398	0.699731
		Ornithine	0.351856	0.515197	0.327138	0.361648	0.347849	0.440835	0.378957	0.380992	0.460443	0.543222	0.32009	0.457106	0.350139	0.425933	0.386818	0.509614	0.339035	0.326354	0.423555	0.440331	0.42803	0.368956	0.369426	0.445563	0.341907	0.323164	0.389237	0.41314	0.307549	0.252886	0.594963	0.290696	0.477206	0.331197	0.347377	0.521271
		Phenylalanine (L-)	0.866123	0.845287	0.874185	0.805231	0.878143	0.725852	0.782048	0.90386	0.966247	0.888313	0.824411	0.798138	0.733636	0.946875	0.938273	0.86752	0.723342	0.839041	0.827411	0.69852	0.743341	0.797427	0.666689	0.854365	0.781904	0.934205	0.822362	0.764078	0.831861	0.73056	0.8174	0.811103	0.70207	0.790685	0.678908	0.84248
		Proline (L-)	2.91242	3.06812	3.15168	2.85064	2.81431	2.66772	2.83523	2.86302	3.16149	2.5378	2.89263	2.72295	2.52098	1.55507	3.2587	2.87804	2.27218	2.68214	2.58218	2.0889	2.58419	2.47989	2.21055	2.66462	2.6767	2.94611	2.57048	2.48043	2.48952	2.5695	2.1682	2.76715	2.11174	2.78098	2.22756	2.37097
		Threonine (L-)	0.486856	0.568675	0.531875	0.474014	0.477286	0.408686	0.518341	0.554039	0.536633	0.475152	0.490409	0.482049	0.432842	0.450919	0.530787	0.521092	0.414615	0.527598	0.535569	0.472067	0.4129	0.454657	0.452477	0.443255	0.432782	0.489939	0.470429	0.397308	0.431921	0.410824	0.489455	0.456121	0.456605	0.452222	0.388885	0.472483
		Tyrosine (L-)	0.560321	0.544563	0.564175	0.568575	0.572081	0.433688	0.586848	0.59604	0.62622	0.515796	0.56058	0.530562	0.450927	0.504065	0.583388	0.513672	0.432849	0.566631	0.521294	0.438122	0.470426	0.51063	0.439649	0.552854	0.484925	0.588154	0.547789	0.488273	0.508077	0.474413	0.490064	0.511361	0.451145	0.522776	0.436179	0.455969
		Valine (L-)	0.890558	0.92473	0.855798	0.919973	0.890118	0.763937	0.826245	0.892595	0.971873	0.874722	0.8822	0.87315	0.767503	0.836861	0.928757	0.979599	0.691732	0.857467	0.894811	0.702548	0.779141	0.768871	0.714057	0.866992	0.765936	0.902081	0.850299	0.765518	0.838765	0.711429	0.890366	0.767834	0.748302	0.839625	0.677205	0.787272

## Sheet: ED Fig 6 i
		Extended Data Fig. 6i
		Relative Abundance Value	NTC Minus DOX						NTC Plus DOX						SLC6A14/12A4 gRNA Minus DOX						SLC6A14/12A4 gRNA Plus DOX						SLC6A14/25A15 gRNA Minus DOX						SLC6A14/25A15 gRNA Plus DOX
		Alanine (L-)	0.261581	0.313192	0.263423	0.320848	0.292897	0.257672	0.267152	0.303342	0.241485	0.273603	0.222756	0.257458	0.261907	0.235785	0.326119	0.34777	0.279436	0.314819	0.369325	0.274144	0.230135	0.208945	0.200105	0.247616	0.352662	0.324272	0.398913	0.306607	0.285435	0.288401	0.348933	0.266538	0.286322	0.24074	0.271053	0.243982
		Arginine (L-)	0.932321	1.09408	0.967707	0.97301	1.24391	0.87209	1.02741	1.33243	1.00261	1.19262	0.894902	1.25664	1.03829	0.834156	1.07115	1.31259	1.19217	1.04109	1.36258	1.13355	0.901761	0.882951	1.32888	0.853628	1.36518	1.21417	1.65931	0.942021	1.11761	0.952518	1.49219	1.05373	1.12478	0.902363	1.12133	0.954153
		Asparagine (L-)	0.0245303	0.022951	0.0236379	0.0251957	0.022601	0.022502	0.0270358	0.0261418	0.0222556	0.0236066	0.0195989	0.0263036	0.0267779	0.0195702	0.0225375	0.0261462	0.025253	0.0210489	0.0326786	0.0248587	0.0211573	0.0180669	0.0203018	0.0192773	0.033424	0.0305166	0.0294485	0.025886	0.0290865	0.0279003	0.0307521	0.0251601	0.0289739	0.0207395	0.0218251	0.0216434
		Aspartic acid (L-)	0.0258531	0.00724122	0.0186883	0.0160133	0.0119101	0.00671651	0.0122499	0.0101797	0.0165492	0.0147081	0.0125223	0.00944699	0.0110313	0.00823551	0.0139509	0.0143373	0.00986866	0.0135525	0.015561	0.0102042	0.0127846	0.00998617	0.0193946	0.00874262	0.0129555	0.0156102	0.0177654	0.0093485	0.0143851	0.0155216	0.018257	0.0091909	0.0173663	0.0075362	0.0103083	0.0128015
		Glucose (D)	0.0198552	0.0176917	0.0205973	0.0206389	0.0254291	0.0200961	0.0184356	0.0238613	0.0206044	0.0220472	0.017552	0.0186175	0.0230507	0.0161201	0.0275453	0.0305074	0.0229913	0.0172105	0.0197658	0.0198009	0.0149816	0.0173694	0.0169125	0.0165619	0.0257167	0.0260972	0.0276908	0.0195649	0.0266095	0.0243045	0.0250127	0.0235203	0.0244602	0.0180863	0.0190579	0.0178418
		Glutamic acid (L-)	0.0388722	0.034376	0.054413	0.0979243	0.0648241	0.0300248	0.0581375	0.0417136	0.0631175	0.0590303	0.0531162	0.0426281	0.0452547	0.0293103	0.0524046	0.0626181	0.0394079	0.0694442	0.074794	0.0799734	0.0500822	0.0550375	0.0935102	0.0496603	0.0541184	0.0870008	0.0825584	0.0559946	0.0576153	0.0558999	0.072176	0.0463554	0.0692442	0.0425485	0.0451965	0.0596589
		Glutamine (L-)	2.11306	2.32471	2.35233	2.86829	2.64182	2.59954	2.40997	2.13483	2.17274	2.23317	2.47027	2.58397	2.73743	2.28137	2.4093	2.58238	2.73251	2.48885	2.54521	2.47786	2.18287	2.21608	1.74255	2.49314	3.5197	3.22815	2.91971	2.47435	2.55003	2.43926	2.74505	2.24867	2.14411	2.19983	2.47106	1.95966
		Glycine	0.00975171	0.0121184	0.00895628	0.0158613	0.00970737	0.00788389	0.00818055	0.00885385	0.0111569	0.00900245	0.00975593	0.0102074	0.0120397	0.0107418	0.0100886	0.0138812	0.00985582	0.00829254	0.0274987	0.00895273	0.00937475	0.00644785	0.0223272	0.0248387	0.0111505	0.0116847	0.0210593	0.00995943	0.0131229	0.0322159	0.0133253	0.00859737	0.0164969	0.00761976	0.00929737	0.0070388
		Isoleucine (L-)	0.832231	0.707751	0.831129	0.748505	0.754708	0.842018	0.774854	1.01902	0.561648	0.745095	0.729024	1.07086	1.06464	0.77698	1.02898	1.07605	1.13434	0.844251	1.14967	0.961741	0.695188	0.557392	1.23693	0.88189	1.26373	0.952548	1.01293	0.841981	1.1196	0.670041	1.20919	0.871423	0.749335	0.650085	0.874487	0.900066
		Lactic acid (L-)	1.25994	2.86672	2.10782	2.76352	1.86878	2.48201	1.23507	1.95415	2.18637	3.05297	2.36175	2.3276	1.96434	1.86383	0.396883	0.746374	1.62385	2.7165	2.64371	2.22202	1.72301	1.4751	3.98574	2.35669	1.5701	3.39703	3.65059	3.3628	2.781	3.00131	1.93992	2.17462	2.30847	1.53096	0.25357	1.68525
		Lysine (L-)	0.445149	0.466951	0.455442	0.458505	0.350533	0.416271	0.520672	0.537545	0.425708	0.464593	0.343108	0.497084	0.543192	0.431719	0.419939	0.556922	0.41689	0.4291	0.614927	0.469873	0.335904	0.311067	0.683435	0.385444	0.675067	0.520004	0.577149	0.391486	0.601783	0.444855	0.580902	0.420307	0.491838	0.37065	0.439791	0.373902
		Methionine (L-)	0.261432	0.287586	0.284445	0.280792	0.251589	0.240019	0.29105	0.331124	0.252305	0.320773	0.237287	0.310573	0.326944	0.285936	0.305493	0.382929	0.297826	0.296914	0.445559	0.344052	0.266911	0.215647	0.401542	0.251363	0.386581	0.355501	0.38415	0.266624	0.38858	0.290279	0.37681	0.295	0.311692	0.234821	0.240936	0.259322
		Ornithine	0.25996	0.176898	0.171407	0.162573	0.144031	0.124819	0.160231	0.203884	0.199447	0.144888	0.113787	0.166051	0.205792	0.142748	0.241868	0.223845	0.195086	0.160639	0.23108	0.191232	0.116498	0.129142	0.205309	0.140741	0.214709	0.168029	0.280234	0.162569	0.157134	0.194935	0.390929	0.140068	0.153106	0.129138	0.150997	0.175302
		Phenylalanine (L-)	0.582733	0.534379	0.569057	0.577499	0.525641	0.569339	0.554655	0.672453	0.416158	0.527832	0.506051	0.698456	0.793538	0.534998	0.750919	0.663176	0.720199	0.576981	0.784335	0.627375	0.503773	0.42061	0.859042	0.583026	0.877081	0.695054	0.748766	0.624391	0.847821	0.501139	0.759727	0.612386	0.571204	0.504597	0.596715	0.622456
		Proline (L-)	1.53126	1.67769	1.49837	1.85043	1.55606	1.39074	1.85305	1.95998	1.64767	1.57946	1.22126	1.58934	1.61682	1.47176	2.11113	2.09736	1.80923	1.54324	2.29794	1.75045	1.34033	1.20842	1.78319	1.16651	2.01599	1.79146	2.80429	1.54753	1.82045	1.85966	2.94133	1.43395	1.69603	1.34776	1.54789	1.59479
		Threonine (L-)	0.122096	0.127315	0.124306	0.138977	0.117129	0.0818061	0.162222	0.172652	0.126555	0.121435	0.0961962	0.133496	0.127363	0.0883643	0.144884	0.150064	0.102305	0.162988	0.191808	0.135996	0.105919	0.0765414	0.141817	0.098057	0.11732	0.120925	0.171332	0.103067	0.124252	0.128497	0.185745	0.139984	0.131886	0.121787	0.104753	0.11697
		Tyrosine (L-)	0.181666	0.163311	0.162896	0.202476	0.161548	0.128917	0.218221	0.2366	0.149182	0.162355	0.144865	0.217975	0.211662	0.149664	0.197631	0.214124	0.240475	0.197736	0.256968	0.188991	0.143931	0.129703	0.28052	0.148707	0.225131	0.196332	0.306802	0.182701	0.233967	0.156504	0.235997	0.180473	0.202002	0.165655	0.197089	0.156343
		Valine (L-)	0.620985	0.634491	0.637484	0.684823	0.586155	0.609203	0.740575	0.845292	0.57986	0.732641	0.560299	0.853664	0.785722	0.631312	0.942643	0.901528	0.768053	0.801644	0.981549	0.775519	0.588148	0.545693	1.01052	0.627221	0.952956	0.694528	0.942693	0.626794	0.884415	0.582467	1.07032	0.752253	0.686996	0.572155	0.758838	0.734704
		LOG10	NTC Minus DOX						NTC Plus DOX						SLC6A14/12A4 gRNA Minus DOX						SLC6A14/12A4 gRNA Plus DOX						SLC6A14/25A15 gRNA Minus DOX						SLC6A14/25A15 gRNA Plus DOX
		Alanine (L-)	-0.582394	-0.504189	-0.579347	-0.493701	-0.533286	-0.588932	-0.573242	-0.518067	-0.617109	-0.562879	-0.652171	-0.589294	-0.581852	-0.627483	-0.486624	-0.458707	-0.553718	-0.501939	-0.432592	-0.562022	-0.638018	-0.679968	-0.698742	-0.606221	-0.452641	-0.48909	-0.399121	-0.513418	-0.544493	-0.540003	-0.457258	-0.574241	-0.543146	-0.618452	-0.566946	-0.612642
		Arginine (L-)	-0.0304347	0.0390495	-0.0142562	-0.0118825	0.0947882	-0.0594388	0.0117419	0.124643	0.00113223	0.0765034	-0.0482244	0.0992093	0.0163181	-0.0787528	0.029849	0.118128	0.0763375	0.0174882	0.134363	0.0544395	-0.0449085	-0.0540634	0.123486	-0.0687312	0.135189	0.0842781	0.219928	-0.0259394	0.0482921	-0.0211266	0.173825	0.0227312	0.0510667	-0.0446186	0.0497339	-0.0203819
		Asparagine (L-)	-1.6103	-1.6392	-1.62639	-1.59867	-1.64587	-1.64778	-1.56806	-1.58266	-1.65256	-1.62697	-1.70777	-1.57998	-1.57222	-1.7084	-1.64709	-1.58259	-1.59769	-1.67677	-1.48574	-1.60452	-1.67454	-1.74312	-1.69246	-1.71495	-1.47594	-1.51546	-1.53094	-1.58694	-1.53631	-1.55439	-1.51212	-1.59929	-1.53799	-1.6832	-1.66104	-1.66468
		Aspartic acid (L-)	-1.58749	-2.14019	-1.72843	-1.79552	-1.92408	-2.17286	-1.91187	-1.99227	-1.78122	-1.83244	-1.90232	-2.02471	-1.95737	-2.08431	-1.8554	-1.84353	-2.00574	-1.86798	-1.80796	-1.99122	-1.89331	-2.0006	-1.71232	-2.05836	-1.88754	-1.80659	-1.75043	-2.02926	-1.84209	-1.80906	-1.73857	-2.03664	-1.76029	-2.12285	-1.98681	-1.89274
		Glucose (D)	-1.70212	-1.75223	-1.68619	-1.68531	-1.59467	-1.69689	-1.73434	-1.62231	-1.68604	-1.65665	-1.75567	-1.73008	-1.63732	-1.79263	-1.55995	-1.51559	-1.63844	-1.76421	-1.70409	-1.70331	-1.82444	-1.76021	-1.77179	-1.78089	-1.58979	-1.58341	-1.55766	-1.70852	-1.57496	-1.61431	-1.60184	-1.62856	-1.61154	-1.74265	-1.71993	-1.74856
		Glutamic acid (L-)	-1.41036	-1.46374	-1.2643	-1.00911	-1.18826	-1.52252	-1.23554	-1.37972	-1.19985	-1.22893	-1.27477	-1.3703	-1.34434	-1.53298	-1.28063	-1.2033	-1.40442	-1.15836	-1.12613	-1.09705	-1.30032	-1.25934	-1.02914	-1.30399	-1.26666	-1.06048	-1.08324	-1.25185	-1.23946	-1.25259	-1.14161	-1.3339	-1.15962	-1.37112	-1.3449	-1.22432
		Glutamine (L-)	0.324912	0.366369	0.371498	0.457623	0.421903	0.414897	0.382012	0.329364	0.337007	0.348921	0.392745	0.412288	0.437343	0.358196	0.38189	0.41202	0.436561	0.395999	0.405724	0.394077	0.339029	0.345585	0.241185	0.396747	0.546506	0.508954	0.46534	0.393462	0.406546	0.387257	0.43855	0.351927	0.331248	0.342389	0.392883	0.292181
		Glycine	-2.01092	-1.91655	-2.04787	-1.79966	-2.0129	-2.10326	-2.08722	-2.05287	-1.95246	-2.04564	-2.01073	-1.99108	-1.91938	-1.96892	-1.99617	-1.85757	-2.00631	-2.08131	-1.56069	-2.04804	-2.02804	-2.19059	-1.65117	-1.60487	-1.95271	-1.93238	-1.67656	-2.00177	-1.88197	-1.49193	-1.87532	-2.06563	-1.7826	-2.11806	-2.03164	-2.1525
		Isoleucine (L-)	-0.0797563	-0.15012	-0.0803316	-0.125805	-0.122221	-0.0746785	-0.11078	0.00818483	-0.250536	-0.127788	-0.137258	0.0297316	0.0272041	-0.10959	0.0124056	0.031832	0.0547418	-0.0735283	0.0605735	-0.0169421	-0.157898	-0.25384	0.092345	-0.0545855	0.101654	-0.021113	0.00558127	-0.0746978	0.0490642	-0.173898	0.0824948	-0.059771	-0.125324	-0.18703	-0.0582468	-0.0457257
		Lactic acid (L-)	0.100351	0.457386	0.323834	0.441463	0.271558	0.394804	0.0916921	0.290959	0.339723	0.484722	0.373234	0.366909	0.293216	0.270405	-0.401337	-0.127043	0.210546	0.43401	0.422215	0.346748	0.236288	0.16882	0.600509	0.372302	0.195928	0.531099	0.562363	0.526701	0.444201	0.477311	0.287785	0.337383	0.363324	0.184965	-0.595902	0.226665
		Lysine (L-)	-0.351494	-0.330729	-0.341567	-0.338656	-0.455271	-0.380624	-0.283435	-0.269585	-0.370888	-0.332927	-0.46457	-0.30357	-0.265047	-0.364799	-0.376814	-0.254205	-0.379978	-0.367442	-0.211176	-0.32802	-0.473784	-0.507146	-0.165303	-0.414039	-0.170653	-0.283993	-0.238712	-0.407284	-0.22056	-0.351781	-0.235897	-0.376433	-0.308178	-0.431036	-0.356754	-0.427242
		Methionine (L-)	-0.582641	-0.541232	-0.546002	-0.551615	-0.599308	-0.619755	-0.536032	-0.48001	-0.598074	-0.493802	-0.624727	-0.507837	-0.485527	-0.543731	-0.514999	-0.416881	-0.526037	-0.52737	-0.351095	-0.463376	-0.573634	-0.666256	-0.396269	-0.599699	-0.412759	-0.449159	-0.415499	-0.5741	-0.410519	-0.537184	-0.423877	-0.530178	-0.506275	-0.629264	-0.618098	-0.586161
		Ornithine	-0.585093	-0.752276	-0.765972	-0.78895	-0.841545	-0.903718	-0.795253	-0.690616	-0.700171	-0.838969	-0.943907	-0.779759	-0.686572	-0.84543	-0.616421	-0.650052	-0.709774	-0.794148	-0.636237	-0.71844	-0.933681	-0.888931	-0.687591	-0.851581	-0.66815	-0.774616	-0.552479	-0.788961	-0.80373	-0.710111	-0.407903	-0.853662	-0.815008	-0.888945	-0.821031	-0.756214
		Phenylalanine (L-)	-0.234531	-0.27215	-0.244844	-0.238449	-0.279311	-0.244629	-0.255977	-0.172338	-0.380741	-0.277505	-0.295806	-0.155861	-0.100432	-0.271648	-0.124407	-0.178371	-0.142548	-0.238839	-0.105498	-0.202473	-0.297765	-0.376121	-0.0659855	-0.234312	-0.0569602	-0.157981	-0.125654	-0.204543	-0.0716959	-0.300042	-0.119342	-0.212974	-0.243209	-0.297055	-0.224233	-0.205892
		Proline (L-)	0.18505	0.224711	0.175619	0.267272	0.192026	0.143247	0.267887	0.292253	0.21687	0.198508	0.0868066	0.201217	0.208661	0.167836	0.324515	0.321673	0.257493	0.188434	0.361338	0.243149	0.127211	0.0822165	0.251197	0.0668884	0.304488	0.253207	0.447823	0.189639	0.260179	0.269434	0.468544	0.156533	0.229434	0.129614	0.189739	0.202704
		Threonine (L-)	-0.9133	-0.89512	-0.905507	-0.857057	-0.931337	-1.08721	-0.789891	-0.762828	-0.89772	-0.915655	-1.01684	-0.874532	-0.894958	-1.05372	-0.83898	-0.823725	-0.990103	-0.787843	-0.717133	-0.866474	-0.975027	-1.1161	-0.848272	-1.00852	-0.930627	-0.917484	-0.766161	-0.98688	-0.905696	-0.891106	-0.731082	-0.853923	-0.879801	-0.914398	-0.979833	-0.931927
		Tyrosine (L-)	-0.740725	-0.786985	-0.78809	-0.693627	-0.791698	-0.889688	-0.661102	-0.625986	-0.826285	-0.789534	-0.839038	-0.661593	-0.674356	-0.824884	-0.704145	-0.669334	-0.61893	-0.703915	-0.590122	-0.72356	-0.841845	-0.887051	-0.552037	-0.827667	-0.647566	-0.70701	-0.513142	-0.73826	-0.630846	-0.805476	-0.627094	-0.743588	-0.694644	-0.780795	-0.705337	-0.805922
		Valine (L-)	-0.206919	-0.197575	-0.195531	-0.164421	-0.231987	-0.215238	-0.130431	-0.0729932	-0.236677	-0.135109	-0.25158	-0.068713	-0.104731	-0.199756	-0.0256528	-0.0450208	-0.114609	-0.0960184	-0.00808779	-0.110407	-0.230513	-0.263052	0.00454521	-0.202579	-0.020927	-0.15831	-0.0256296	-0.202875	-0.0533437	-0.234729	0.0295133	-0.123636	-0.163046	-0.242486	-0.119851	-0.133887
		ANTILOG	NTC Minus DOX						NTC Plus DOX						SLC6A14/12A4 gRNA Minus DOX						SLC6A14/12A4 gRNA Plus DOX						SLC6A14/25A15 gRNA Minus DOX						SLC6A14/25A15 gRNA Plus DOX
		Alanine (L-)	0.558559	0.603995	0.560264	0.610364	0.586674	0.554919	0.563695	0.595671	0.539502	0.569567	0.520914	0.554719	0.558862	0.533934	0.614698	0.6321	0.574809	0.605356	0.648825	0.570055	0.528338	0.506633	0.49721	0.545408	0.635947	0.613184	0.670909	0.598446	0.580136	0.582747	0.633017	0.563132	0.580918	0.538778	0.567255	0.541917
		Arginine (L-)	0.970024	1.03982	0.985845	0.988188	1.09943	0.942293	1.01181	1.13274	1.00113	1.07951	0.95292	1.1043	1.01645	0.924268	1.0303	1.12539	1.07933	1.01764	1.14381	1.05595	0.956085	0.947372	1.13143	0.933578	1.14475	1.08793	1.24599	0.974394	1.04948	0.979095	1.18985	1.02299	1.05239	0.956362	1.05099	0.979824
		Asparagine (L-)	0.199828	0.194135	0.196638	0.202165	0.192844	0.192477	0.208449	0.205427	0.191559	0.196525	0.18127	0.205978	0.207583	0.181155	0.192609	0.205442	0.202364	0.186977	0.226335	0.200986	0.187395	0.174974	0.184065	0.179972	0.228563	0.219706	0.216333	0.204552	0.215174	0.211318	0.220441	0.20204	0.214812	0.185778	0.189941	0.189252
		Aspartic acid (L-)	0.204439	0.117633	0.177563	0.166041	0.146009	0.113852	0.147804	0.136386	0.168432	0.160022	0.149223	0.132033	0.141229	0.124393	0.156391	0.158257	0.13456	0.154435	0.163988	0.136529	0.150572	0.135254	0.180447	0.127663	0.151443	0.164213	0.1737	0.131433	0.158486	0.163807	0.175772	0.130466	0.171994	0.11969	0.137132	0.150659
		Glucose (D)	0.182296	0.173387	0.185224	0.185386	0.202976	0.183253	0.176516	0.197443	0.185252	0.190778	0.172791	0.17727	0.194501	0.166521	0.210146	0.219677	0.194283	0.171323	0.181939	0.182079	0.161307	0.172008	0.170028	0.168488	0.203969	0.205275	0.210627	0.181133	0.207015	0.199027	0.201526	0.196213	0.19958	0.175056	0.179079	0.174024
		Glutamic acid (L-)	0.244055	0.231368	0.282438	0.364543	0.30475	0.218162	0.290677	0.251648	0.301239	0.292607	0.279494	0.25403	0.260713	0.215892	0.277862	0.300202	0.24551	0.313999	0.324285	0.333853	0.272446	0.283841	0.357314	0.271446	0.281772	0.346291	0.338497	0.285974	0.28954	0.285764	0.319305	0.263448	0.313606	0.253824	0.260567	0.293956
		Glutamine (L-)	1.38391	1.44249	1.44991	1.58031	1.52486	1.51421	1.46523	1.39008	1.40075	1.41754	1.48104	1.51027	1.54859	1.43075	1.46505	1.50986	1.54738	1.48587	1.50039	1.48301	1.40358	1.41282	1.27276	1.48698	1.72721	1.66355	1.59255	1.4821	1.50162	1.47294	1.55046	1.4218	1.3927	1.40831	1.48125	1.33935
		Glycine	0.133866	0.147113	0.129009	0.165355	0.133601	0.122058	0.124032	0.128366	0.141925	0.129298	0.133891	0.136547	0.146697	0.139607	0.135855	0.156051	0.134484	0.124766	0.209992	0.128987	0.131593	0.111851	0.191826	0.200916	0.14189	0.144803	0.187017	0.135097	0.15229	0.224938	0.153306	0.126738	0.168201	0.120265	0.13112	0.116193
		Isoleucine (L-)	0.923341	0.860605	0.92281	0.881787	0.884953	0.928042	0.895136	1.00822	0.778384	0.88004	0.871745	1.03018	1.02758	0.896202	1.01248	1.03234	1.05627	0.92911	1.06245	0.983201	0.853937	0.775816	1.09674	0.946878	1.107	0.979108	1.0056	0.928024	1.05029	0.840382	1.08599	0.94198	0.882211	0.829419	0.943417	0.955304
		Lactic acid (L-)	1.10556	1.57994	1.38242	1.55498	1.31201	1.48409	1.09603	1.33771	1.40456	1.62372	1.45242	1.44327	1.34073	1.3105	0.669424	0.880695	1.23435	1.54343	1.52534	1.41446	1.26654	1.18391	1.82305	1.45107	1.21644	1.7008	1.75481	1.69334	1.55924	1.61173	1.33347	1.40128	1.4381	1.20318	0.551065	1.25441
		Lysine (L-)	0.703636	0.7184	0.710656	0.712727	0.634276	0.683435	0.753192	0.763696	0.690121	0.716823	0.628405	0.738178	0.76717	0.694336	0.686044	0.775532	0.683876	0.692504	0.809631	0.720349	0.622641	0.602212	0.847637	0.660975	0.843114	0.752772	0.787641	0.665455	0.80207	0.703434	0.789862	0.686305	0.734784	0.649836	0.699945	0.652306
		Methionine (L-)	0.558422	0.582031	0.579261	0.576019	0.549192	0.538076	0.585065	0.618777	0.54987	0.610301	0.535408	0.601796	0.615373	0.580578	0.597501	0.659099	0.590942	0.590155	0.703917	0.629156	0.563474	0.513628	0.672826	0.548977	0.661822	0.638165	0.660011	0.563212	0.663306	0.584392	0.654504	0.5885	0.602737	0.532984	0.538969	0.556459
		Ornithine	0.557054	0.471293	0.464882	0.454321	0.431044	0.405061	0.451467	0.501267	0.4965	0.432156	0.389105	0.458516	0.503299	0.429373	0.539873	0.522018	0.491755	0.451966	0.52928	0.487512	0.393104	0.411095	0.502786	0.42674	0.512656	0.460881	0.575522	0.454317	0.447656	0.49159	0.665044	0.425852	0.442636	0.411089	0.439978	0.46944
		Phenylalanine (L-)	0.790942	0.76174	0.782827	0.787849	0.756305	0.782995	0.77416	0.841695	0.683355	0.757672	0.743932	0.855678	0.904446	0.762123	0.88302	0.836632	0.867146	0.787542	0.899876	0.816709	0.742475	0.68652	0.936144	0.791115	0.944632	0.853866	0.88192	0.81502	0.930814	0.740787	0.887504	0.808177	0.784108	0.743003	0.799129	0.813921
		Proline (L-)	1.20328	1.25196	1.19198	1.3064	1.2117	1.15401	1.3072	1.33944	1.24218	1.21958	1.09069	1.22289	1.23203	1.18274	1.38336	1.37943	1.29368	1.20736	1.43525	1.27526	1.13566	1.08569	1.28556	1.06918	1.35593	1.28815	1.5649	1.20881	1.29716	1.30922	1.59767	1.16945	1.25789	1.13839	1.20893	1.22471
		Threonine (L-)	0.401198	0.408558	0.404337	0.424409	0.394026	0.337154	0.453894	0.466346	0.407498	0.400254	0.361735	0.417057	0.408625	0.348637	0.432151	0.438794	0.371538	0.454825	0.48815	0.420431	0.377182	0.327554	0.428154	0.364758	0.394306	0.399523	0.464794	0.372738	0.404261	0.410202	0.481388	0.425741	0.414866	0.400758	0.375374	0.393794
		Tyrosine (L-)	0.476768	0.455215	0.454713	0.49976	0.453075	0.410784	0.516282	0.534734	0.437672	0.454056	0.432126	0.516029	0.509484	0.438286	0.494531	0.512049	0.538521	0.494645	0.55426	0.485023	0.430915	0.411869	0.575776	0.437068	0.523318	0.493117	0.598612	0.477945	0.532142	0.446875	0.534142	0.475405	0.499252	0.458042	0.493942	0.446676
		Valine (L-)	0.813085	0.820719	0.822398	0.848384	0.792956	0.80635	0.877717	0.929607	0.789246	0.873621	0.777571	0.933595	0.900566	0.81893	0.974673	0.955978	0.891715	0.908447	0.991945	0.895469	0.794126	0.768702	1.00456	0.816622	0.97929	0.853585	0.974696	0.81638	0.948054	0.790785	1.02995	0.883701	0.849552	0.784675	0.887053	0.874689
