# Supplementary material for: Phenotypic profiling of solute carriers characterizes serine transport in cancer
Source: Nat Metab. 2023 Dec 8;5(12):2148–68. doi: 10.1038/s42255-023-00936-2 (PMC10730406; doi:10.1038/s42255-023-00936-2)
Supplement: Supplementary file 16 — Statistical source data related to Extended Data Fig. 7. [file 42255_2023_936_MOESM16_ESM.xlsx]

## Sheet: ED Fig 7 a
	Extended Data Fig 7a
	COAD
	SLC6A14									SLC12A4								SLC25A15									SLC6A14 HIGH- SLC12A4					Time (Days)	SLC6A14 High - SLC12A4 High	SLC6A14 High - SLC12A4 Low		SLC6A14 HIGH- SLC25A15					Time (Days)	SLC6A14 High - SLC25A15 Low (20)	SLC6A14 High - SLC25A15 High (20)
	Low	High			Time (Days)	SLC6A14 High	SLC6A14 Low			Low	High			Time (Days)	SLC12A4 High	SLC12A4 Low		Low	High				Time (Days)	SLC25A15 High	SLC25A15 Low		Low	High			TCGA-AA-A02Y-01	1216		0		Low	High			TCGA-CM-4743-01	701	0
	-9.966	3.91		TCGA-CM-6171-01	427	0				0.8568	3.916		TCGA-DM-A1D4-01	2821		1		1.379	3.804			TCGA-DM-A0XD-01	743		1		1.071	4.045			TCGA-AA-A01Z-01	1126		0		1.486	3.621			TCGA-AZ-6607-01	97	1
	-9.966	3.329		TCGA-AY-A54L-01	525	0				0.9935	3.924		TCGA-A6-3809-01	996		0		1.486	3.818			TCGA-CM-4743-01	701		0		1.86	4.051			TCGA-AA-3675-01	1431		0		1.605	3.719			TCGA-DM-A282-01	4233	0
	-9.966	2.39		TCGA-F4-6461-01	338	1				1.071	3.926		TCGA-AA-A02Y-01	1216		0		1.576	3.824			TCGA-A6-3809-01	996		0		2.348	4.054			TCGA-A6-6648-01	766		0		1.812	3.755			TCGA-A6-6781-01	598	0
	-9.966	2.164		TCGA-CM-6166-01	669	0				1.305	3.932		TCGA-DM-A0X9-01	3641		0		1.605	3.825			TCGA-AZ-6607-01	97		1		2.354	4.105			TCGA-CA-5796-01	377		0		1.941	3.786			TCGA-G4-6321-01	672	0
	-6.506	3.315		TCGA-D5-5538-01	1661	1				1.334	3.938		TCGA-A6-6650-01	627		0		1.628	3.846			TCGA-AY-6196-01	6		0		2.433	4.118			TCGA-DM-A28C-01	2475		1		2.011	3.86			TCGA-A6-5665-01	671	0
	-6.506	2.539		TCGA-A6-6141-01	255	0				1.633	3.951		TCGA-A6-2677-01	740		1		1.665	3.86			TCGA-A6-2672-01	1419		0		2.454	4.173			TCGA-AZ-5407-01	2683		0		2.034	3.904			TCGA-CA-5255-01	376	0
	-6.506	4.261		TCGA-A6-6140-01	734	0				1.647	3.955		TCGA-DM-A28H-01	3561		0		1.725	3.86			TCGA-A6-2677-01	740		1		2.465	4.297			TCGA-CK-4950-01	2599		0		2.101	3.922			TCGA-AA-A01P-01	1158	1
	-5.966	3.773		TCGA-D5-6538-01	521	0				1.683	3.963		TCGA-AZ-4315-01	1776		0		1.74	3.872			TCGA-DM-A1D4-01	2821		1		2.58	4.331			TCGA-AA-3509-01	1915		0		2.125	3.964			TCGA-F4-6703-01	1456	0
	-5.574	3.86		TCGA-5M-AATE-01	1200	0				1.752	3.977		TCGA-A6-6780-01	612		0		1.812	3.881			TCGA-DM-A282-01	4233		0		2.63	4.356			TCGA-AA-3502-01	1065		0		2.196	3.967			TCGA-DM-A1HB-01	4126	0
	-5.574	2.604		TCGA-CK-4950-01	2599	0				1.753	3.981		TCGA-G4-6304-01	1631		0		1.905	3.884			TCGA-A6-2684-01	1127		0		2.635	4.411			TCGA-CM-6678-01	335		0		2.23	4			TCGA-AD-6889-01	2532	1
	-5.574	1.812		TCGA-DM-A282-01	4233	0				1.806	3.981		TCGA-A6-3810-01	1111		0		1.915	3.889			TCGA-G4-6302-01	2047		1		2.646	4.54			TCGA-CM-6163-01	427		0		2.278	4.026			TCGA-AM-5821-01	28	0
	-5.574	4.709		TCGA-AA-3509-01	1915	0				1.832	3.995		TCGA-AY-5543-01	1004		0		1.93	3.898			TCGA-CM-4747-01	761		0		2.683	4.575			TCGA-AY-A8YK-01	573		0		2.293	4.046			TCGA-CM-5861-01	457	0
	-5.012	3.904		TCGA-D5-6537-01	146	1				1.86	3.999		TCGA-CM-5864-01	457		0		1.941	3.9			TCGA-A6-6781-01	598		0		2.768	4.577			TCGA-AZ-6606-01	357		1		2.331	4.308			TCGA-AY-A71X-01	588	0
	-5.012	3.445		TCGA-AA-A01Z-01	1126	0				1.86	4		TCGA-AA-A01Z-01	1126		0		1.964	3.904			TCGA-DM-A28M-01	2895		0		2.787	4.663			TCGA-DM-A1HB-01	4126		0		2.412	4.709			TCGA-A6-A565-01	494	1
	-5.012	2.671		TCGA-3L-AA1B-01	475	0				1.884	4.006		TCGA-AZ-6608-01	59		1		1.975	3.91			TCGA-G4-6320-01	804		0		2.793	4.704			TCGA-A6-6649-01	735	0			2.428	4.781			TCGA-A6-6649-01	735		0
	-5.012	3.144		TCGA-CK-6746-01	0	0				1.945	4.008		TCGA-QG-A5YX-01	1003		0		1.993	3.922			TCGA-AZ-4616-01	156		1						TCGA-A6-5664-01	672	0							TCGA-D5-7000-01	312		0
	-4.608	3.043		TCGA-AZ-5407-01	2683	0				1.953	4.015		TCGA-DM-A1DB-01	1348		1		2.011	3.926			TCGA-G4-6321-01	672		0						TCGA-CK-4951-01	2134	1							TCGA-CK-5916-01	643		1
	-4.293	2.412		TCGA-AY-A71X-01	588	0				1.997	4.045		TCGA-DM-A28G-01	1849		1		2.034	3.964			TCGA-A6-5665-01	671		0						TCGA-CA-5254-01	386	0							TCGA-CM-6163-01	427		0
	-4.293	3.167		TCGA-AA-3502-01	1065	0				2.004	4.051		TCGA-D5-6538-01	521		0		2.081	3.967			TCGA-F4-6704-01	47		0						TCGA-A6-A565-01	494	1							TCGA-5M-AATE-01	1200		0
	-4.293	2.858		TCGA-DM-A28C-01	2475	1				2.067	4.054		TCGA-DM-A28K-01	2988		0		2.091	3.977			TCGA-DM-A288-01	427		1						TCGA-CM-6675-01	397	0							TCGA-D5-6537-01	146		1
	-4.035	3.141		TCGA-NH-A50V-01	588	0				2.071	4.07		TCGA-CK-4952-01	475		0		2.101	3.982			TCGA-CA-5255-01	376		0						TCGA-D5-6928-01	354	0							TCGA-CA-6718-01	306		1
	-3.885	3.967		TCGA-AY-A8YK-01	573	0				2.095	4.102		TCGA-CA-5256-01	379		0		2.108	3.994			TCGA-NH-A6GC-01	389		0						TCGA-CA-6718-01	306	1							TCGA-DM-A285-01	179		1
	-3.458	2.892		TCGA-CM-6678-01	335	0				2.101	4.105		TCGA-DM-A28M-01	2895		0		2.118	4			TCGA-DM-A280-01	236		1						TCGA-A6-5657-01	962	0							TCGA-AY-A8YK-01	573		0
	-3.458	2.593		TCGA-A6-5661-01	1020	0				2.105	4.118		TCGA-G4-6626-01	1422		1		2.125	4			TCGA-DM-A28K-01	2988		0						TCGA-AA-A01P-01	1158	1							TCGA-NH-A6GB-01	476		0
	-3.458	4.308		TCGA-AZ-6606-01	357	1				2.115	4.128		TCGA-NH-A8F7-06	543		0		2.125	4			TCGA-AA-A01P-01	1158		1						TCGA-F4-6703-01	1456	0							TCGA-D5-6931-01	365		0
	-3.308	2.278		TCGA-AD-6889-01	2532	1				2.121	4.13		TCGA-D5-5540-01	1706		0		2.154	4.004			TCGA-CK-5915-01	0		0						TCGA-D5-6540-01	491	0							TCGA-AA-3506-01	1765		0
	-3.171	3.143		TCGA-AU-3779-01	441	0				2.138	4.138		TCGA-D5-6532-01	555		0		2.164	4.019			TCGA-CM-6166-01	669		0						TCGA-AD-6895-01	763	0							TCGA-AZ-6606-01	357		1
	-3.047	3.224		TCGA-AA-3675-01	1431	0				2.143	4.153		TCGA-G4-6306-01	1359		0		2.17	4.026			TCGA-F4-6809-01	403		1						TCGA-AZ-6607-01	97	1							TCGA-AA-3509-01	1915		0
	-3.047	3.113		TCGA-AZ-6601-01	3042	1				2.154	4.173		TCGA-A6-5659-01	926		0		2.196	4.046			TCGA-F4-6703-01	1456		0						TCGA-CM-6162-01	365	0							TCGA-A6-6648-01	766		0
	-3.047	2.774		TCGA-CA-6716-01	371	0				2.161	4.187		TCGA-DM-A28E-01	3648		0		2.23	4.064			TCGA-DM-A1HB-01	4126		0
	-2.932	2.125		TCGA-AA-A01P-01	1158	1				2.164	4.222		TCGA-DM-A0XD-01	743		1		2.254	4.07			TCGA-G4-6307-01	1674		0
	-2.727	1.941		TCGA-A6-6781-01	598	0				2.177	4.259		TCGA-A6-2674-01	1331		0		2.257	4.078			TCGA-D5-5537-01	1381		1
	-2.727	4.781		TCGA-A6-6648-01	766	0				2.196	4.264		TCGA-DM-A1D0-01	3974		0		2.278	4.1			TCGA-AD-6889-01	2532		1
	-2.548	4.026		TCGA-D5-6931-01	365	0				2.242	4.297		TCGA-G4-6294-01	858		1		2.293	4.109			TCGA-AM-5821-01	28		0
	-2.548	2.818		TCGA-D5-6529-01	614	0				2.254	4.327		TCGA-CM-5862-01	153		1		2.303	4.109			TCGA-A6-5656-01	1001		0
	-2.388	2.864		TCGA-CM-6675-01	397	0				2.296	4.331		TCGA-RU-A8FL-01	1177		0		2.316	4.144			TCGA-4N-A93T-01	146		0
	-2.315	3.547		TCGA-A6-4105-01	442	1				2.316	4.351		TCGA-AY-A54L-01	525		0		2.328	4.172			TCGA-A6-2685-01	1133		0
	-2.315	4.046		TCGA-AA-3506-01	1765	0				2.328	4.351		TCGA-DM-A1DA-01	228		1		2.331	4.19			TCGA-CM-5861-01	457		0
	-2.315	2.428		TCGA-A6-A565-01	494	1				2.348	4.356		TCGA-A6-5666-01	995		0		2.362	4.216			TCGA-AD-6888-01	472		1
	-2.315	3.534		TCGA-CM-4743-01	701	0				2.354	4.381		TCGA-AA-3675-01	1431		0		2.387	4.22			TCGA-DM-A1D9-01	4270		0
	-2.245	1.486		TCGA-CM-5863-01	457	0				2.354	4.399		TCGA-AZ-4682-01	680		1		2.39	4.237			TCGA-CM-4744-01	609		0
	-2.245	2.578		TCGA-AD-6895-01	763	0				2.359	4.411		TCGA-A6-6648-01	766		0		2.39	4.261			TCGA-F4-6461-01	338		1
	-2.245	2.625		TCGA-AA-A02Y-01	1216	0				2.368	4.423		TCGA-AA-3663-01	212		0		2.395	4.266			TCGA-AZ-4615-01	1002		0
	-2.245	3.134		TCGA-A6-5665-01	671	0				2.428	4.524		TCGA-DM-A288-01	427		1		2.412	4.279			TCGA-AY-A71X-01	588		0
	-2.178	2.034		TCGA-G4-6588-01	796	0				2.433	4.54		TCGA-AA-3685-01	1127		0		2.428	4.308			TCGA-A6-A565-01	494		1
	-1.994	3.325		TCGA-CA-5254-01	386	0				2.433	4.541		TCGA-D5-6530-01	621		0		2.433	4.311			TCGA-CM-4751-01	822		0
	-1.938	3.446		TCGA-CM-6162-01	365	0				2.454	4.575		TCGA-CA-5796-01	377		0		2.439	4.36			TCGA-G4-6304-01	1631		0
	-1.884	3.17		TCGA-NH-A6GA-01	302	1				2.465	4.577		TCGA-DM-A28C-01	2475		1		2.441	4.368			TCGA-A6-A566-01	758		1
	-1.884	3.088		TCGA-D5-7000-01	312	0				2.49	4.608		TCGA-AZ-5407-01	2683		0		2.444	4.376			TCGA-G4-6322-01	792		0
	-1.831	3.719		TCGA-CM-5860-01	974	0				2.491	4.663		TCGA-A6-5656-01	1001		0		2.47	4.397			TCGA-AA-A02K-01	426		1
	-1.781	3.331		TCGA-CM-6163-01	427	0				2.501	4.676		TCGA-NH-A8F7-01	543		0		2.478	4.457			TCGA-D5-6928-01	354		0
	-1.781	3.786		TCGA-AU-6004-01	824	0				2.517	4.704		TCGA-G4-6315-01	1883		0		2.483	4.51			TCGA-AD-A5EJ-01	0		0
	-1.781	3.027		TCGA-AD-5900-01	370	0				2.546	4.733		TCGA-A6-2684-01	1127		0		2.521	4.544			TCGA-CM-5349-01	915		0
	-1.685	2.571		TCGA-G4-6321-01	672	0				2.551	4.807		TCGA-CK-5912-01	1493		1		2.539	4.562			TCGA-A6-6141-01	255		0
	-1.51	2.011		TCGA-AD-6548-01	650	0				2.551	4.868		TCGA-A6-5660-01	888		0		2.544	4.602			TCGA-RU-A8FL-01	1177		0
	-1.47	3.21		TCGA-D5-6928-01	354	0				2.556	4.914		TCGA-CM-4747-01	761		0		2.549	4.709			TCGA-G4-6317-01	1095		0
	-1.47	2.478		TCGA-G4-6293-01	4051	0				2.58	4.997		TCGA-AZ-6599-01	206		1		2.554	4.781			TCGA-CM-5348-01	699		0
		3.266		TCGA-A6-5664-01	672	0				2.592	5.117		TCGA-F4-6704-01	47	0			2.571	5.054			TCGA-AD-5900-01	370		0
		3.081		TCGA-A6-5657-01	962	0							TCGA-QG-A5Z1-01	256	1							TCGA-AZ-4313-01	2310	0
		3.146		TCGA-CA-5255-01	376	0							TCGA-4N-A93T-01	146	0							TCGA-AD-6963-01	834	0
		2.101		TCGA-NH-A6GB-01	476	0							TCGA-A6-5667-01	887	0							TCGA-G4-6299-01	2268	0
		4		TCGA-G4-6628-01	2424	0							TCGA-CK-5913-01	1561	0							TCGA-AD-6965-01	805	0
		3.205		TCGA-D5-6540-01	491	0							TCGA-AZ-4323-01	43	1							TCGA-G4-6625-01	2792	0
		2.86		TCGA-G4-6627-01	2275	0							TCGA-G4-6293-01	4051	0							TCGA-5M-AATE-01	1200	0
		2.602		TCGA-CK-4951-01	2134	1							TCGA-NH-A8F8-01	511	1							TCGA-A6-6142-01	763	0
		3.256		TCGA-DM-A285-01	179	1							TCGA-A6-2675-01	1321	0							TCGA-CA-6715-01	383	0
		3.964		TCGA-CM-5861-01	457	0							TCGA-AD-6899-01	176	1							TCGA-AA-3526-01	580	0
		2.331		TCGA-AD-A5EJ-01	0	0							TCGA-NH-A50V-01	588	0							TCGA-A6-5660-01	888	0
		2.483		TCGA-A6-6649-01	735	0							TCGA-NH-A6GC-01	389	0							TCGA-5M-AAT6-01	290	1
		3.621		TCGA-F4-6703-01	1456	0							TCGA-G4-6310-01	1935	0							TCGA-F4-6854-01	16	0
		2.196		TCGA-CK-5913-01	1561	0							TCGA-D5-6898-01	229	0							TCGA-A6-5662-01	718	0
		3.402		TCGA-CK-5916-01	643	1							TCGA-AY-A71X-01	588	0							TCGA-D5-6537-01	146	1
		3.755		TCGA-CA-5796-01	377	0							TCGA-G4-6628-01	2424	0							TCGA-CM-6171-01	427	0
		2.941		TCGA-D5-6920-01	377	0							TCGA-F4-6570-01	188	1							TCGA-CA-6718-01	306	1
		3.272		TCGA-AZ-6607-01	97	1							TCGA-D5-5537-01	1381	1							TCGA-NH-A50T-01	553	0
		1.605		TCGA-F4-6570-01	188	1							TCGA-AZ-6605-01	159	1							TCGA-DM-A285-01	179	1
		3.213		TCGA-CA-6718-01	306	1							TCGA-F4-6809-01	403	1							TCGA-AY-A8YK-01	573	0
		3.922		TCGA-DM-A1HB-01	4126	0							TCGA-CM-4743-01	701	0							TCGA-A6-5667-01	887	0
		2.23		TCGA-AM-5821-01	28	0							TCGA-A6-6649-01	735	0							TCGA-DM-A28A-01	805	1
		2.293		TCGA-5M-AATA-01									TCGA-A6-5664-01	672	0							TCGA-CM-6172-01	335	0
				TCGA-WS-AB45-01	2130		0						TCGA-CK-4951-01	2134	1							TCGA-NH-A6GB-01	476	0
				TCGA-G4-6310-01	1935		0						TCGA-5M-AAT6-01	290	1							TCGA-G4-6314-01	1093	0
				TCGA-DM-A1DB-01	1348		1						TCGA-D5-6926-01	275	0							TCGA-A6-A56B-01	1711	1
				TCGA-NH-A50U-01	334		1						TCGA-CA-5254-01	386	0							TCGA-5M-AAT5-01
				TCGA-D5-6926-01	275		0						TCGA-A6-A565-01	494	1							TCGA-A6-5666-01	995	0
				TCGA-D5-6932-01	346		0						TCGA-NH-A5IV-01	588	0							TCGA-D5-6931-01	365	0
				TCGA-AZ-6598-01	1503		1						TCGA-A6-2685-01	1133	0							TCGA-AA-3506-01	1765	0
				TCGA-A6-2677-01	740		1						TCGA-F4-6569-01	1087	0							TCGA-AM-5820-01	14	0
				TCGA-D5-5541-01	1701		0						TCGA-CM-6679-01	306	0							TCGA-A6-6138-01	685	0
				TCGA-A6-5667-01	887		0						TCGA-CM-6675-01	397	0							TCGA-DM-A28E-01	3648	0
				TCGA-CM-6679-01	306		0						TCGA-A6-6651-01	662	0							TCGA-D5-5541-01	1701	0
				TCGA-G4-6307-01	1674		0						TCGA-AA-3489-01	214	1							TCGA-NH-A8F7-01	543	0
				TCGA-AA-3663-01	212		0						TCGA-G4-6297-01	2506	0							TCGA-SS-A7HO-01	1829	0
				TCGA-DM-A1DA-01	228		1						TCGA-A6-6142-01	763	0							TCGA-G4-6311-01	1199	0
				TCGA-F4-6459-01	262		1						TCGA-D5-6928-01	354	0							TCGA-CK-4947-01	534	0
				TCGA-G4-6317-01	1095		0						TCGA-A6-6654-01	726	0							TCGA-A6-6650-01	627	0
				TCGA-G4-6317-02	1095		0						TCGA-CA-6718-01	306	1							TCGA-D5-6923-01	378	0
				TCGA-A6-A56B-01	1711		1						TCGA-D5-6923-01	378	0							TCGA-CM-6168-01	395	0
				TCGA-CK-4948-01	4502		0						TCGA-G4-6314-01	1093	0							TCGA-AZ-5403-01	1910	1
				TCGA-D5-5540-01	1706		0						TCGA-A6-5657-01	962	0							TCGA-A6-6140-01	734	0
				TCGA-AA-A02K-01	426		1						TCGA-CM-6168-01	395	0							TCGA-AA-3697-01	2587	0
				TCGA-A6-6780-01	612		0						TCGA-DM-A1HA-01	4000	0							TCGA-QL-A97D-01	666	0
				TCGA-AZ-6603-01	899		1						TCGA-AA-A01P-01	1158	1							TCGA-AZ-6606-01	357	1
				TCGA-DM-A28H-01	3561		0						TCGA-A6-A56B-01	1711	1							TCGA-AZ-6603-01	899	1
				TCGA-RU-A8FL-01	1177		0						TCGA-AD-6901-01	682	1							TCGA-D5-6532-01	555	0
				TCGA-DM-A1D0-01	3974		0						TCGA-F4-6703-01	1456	0							TCGA-CK-5912-01	1493	1
				TCGA-CM-5862-01	153		1						TCGA-D5-6922-01	308	0							TCGA-D5-6898-01	229	0
				TCGA-DM-A28E-01	3648		0						TCGA-D5-6540-01	491	0							TCGA-CK-5914-01	669	0
				TCGA-A6-5666-01	995		0						TCGA-AD-6895-01	763	0							TCGA-G4-6303-01	2003	1
				TCGA-CM-5868-01	518		0						TCGA-F4-6459-01	262	1							TCGA-D5-6533-01	775	0
				TCGA-NH-A8F7-06	543		0						TCGA-AZ-6607-01	97	1							TCGA-G4-6295-01	254	0
				TCGA-AM-5820-01	14		0						TCGA-CM-6167-01	456	0							TCGA-D5-6922-01	308	0
				TCGA-A6-5656-01	1001		0						TCGA-CM-6162-01	365	0							TCGA-CM-6165-01	488	0
				TCGA-A6-6650-01	627		0						TCGA-A6-A566-01	758	1							TCGA-AA-3509-01	1915	0
				TCGA-F4-6704-01	47		0						TCGA-AY-6196-01	6	0							TCGA-A6-6648-01	766	0
				TCGA-CM-5864-01	457		0						TCGA-G4-6302-01	2047	1							TCGA-G4-6297-01	2506	0
				TCGA-CK-5914-01	669		0						TCGA-D5-6534-01	1316	0
				TCGA-A6-6142-01	763		0						TCGA-CM-5348-01	699	0
				TCGA-CM-6676-01	337		0						TCGA-WS-AB45-01	2130	0
				TCGA-DM-A0XF-01	1162		1
				TCGA-AA-3489-01	214		1
				TCGA-NH-A5IV-01	588		0
				TCGA-DM-A288-01	427		1
				TCGA-G4-6302-01	2047		1
				TCGA-A6-3810-01	1111		0
				TCGA-A6-5662-01	718		0
				TCGA-NH-A6GC-01	389		0
				TCGA-A6-5660-01	888		0
				TCGA-A6-2674-01	1331		0
				TCGA-AA-3496-01	31		0
				TCGA-D5-6922-01	308		0
				TCGA-F4-6808-01	1024		0
				TCGA-CM-6170-01	457		0
				TCGA-CM-5348-01	699		0
				TCGA-DM-A28A-01	805		1
				TCGA-AD-6899-01	176		1
				TCGA-A6-A5ZU-01	293		0

## Sheet: ED Fig 7 b
	Extended Data Fig 7b
	BRCA
	SLC6A14								SLC12A4				Time (Days)	SLC12A4 High	SLC12A4 Low		SLC25A15								SLC6A14 HIGH- SLC12A4				Time (Days)	SLC6A14 High - SLC12A4 High	SLC6A14 High - SLC12A4 Low		SLC6A14 HIGH- SLC25A15				Time (Days)	SLC6A14 High - SLC25A15 Low	SLC6A14 High - SLC25A15 High
	Low	High			Time (Days)	SLC6A14 High	SLC6A14 Low		Low	High		TCGA-E9-A54Y-01	725		0		Low	High			Time (Days)	SLC25A15 High	SLC25A15 Low		Low	High		TCGA-E2-A1LS-01	1604		0		Low	High		TCGA-AO-A0JL-01	1683	0
	-9.966	0.6332		TCGA-E9-A54Y-01	725		0		0.2522	4.549		TCGA-A8-A06Q-01	31		0		-1.056	3.111		TCGA-E9-A54Y-01	725		0		1.215	4.794		TCGA-B6-A0I2-01	4361		0		-0.8339	3.043		TCGA-OL-A5RW-01	1106	0
	-9.966	0.6332		TCGA-EW-A6SA-01	510		0		0.9716	4.553		TCGA-E2-A1LS-01	1604		0		-0.9132	3.118		TCGA-AQ-A54N-01	78		0		1.496	4.795		TCGA-E2-A1LG-01	1523		0		-0.1504	3.05		TCGA-LL-A6FR-01	489	0
	-9.966	0.6517		TCGA-D8-A1JT-01	405		0		1.215	4.554		TCGA-A8-A06Z-01	31		0		-0.8339	3.119		TCGA-AO-A0JL-01	1683		0		2.039	4.797		TCGA-BH-A18T-01	224		1		-0.1345	3.067		TCGA-A2-A04P-01	548	1
	-9.966	0.6608		TCGA-D8-A1Y3-01	430		0		1.444	4.555		TCGA-BH-A0E0-01	134		0		-0.8084	3.119		TCGA-LL-A7SZ-01	594		0		2.211	4.805		TCGA-AO-A0JD-01	2190		0		0.044	3.079		TCGA-Z7-A8R5-01	3287	0
	-9.966	0.679		TCGA-AR-A0TV-01	2288		0		1.486	4.558		TCGA-B6-A0I2-01	4361		0		-0.5332	3.125		TCGA-E9-A3X8-01	926		0		2.245	4.824		TCGA-E9-A1RB-01	976		1		0.2154	3.088		TCGA-BH-A0DL-01	2381	0
	-9.966	0.688		TCGA-AO-A03P-01	2911		1		1.496	4.558		TCGA-EW-A6SA-01	510		0		-0.4719	3.125		TCGA-A2-A0CR-01	3283		0		2.257	4.825		TCGA-E9-A249-01	217		0		0.4447	3.089		TCGA-E2-A1LS-01	1604	0
	-9.966	0.688		TCGA-E9-A1RE-01	1419		0		1.609	4.56		TCGA-D8-A1JT-01	405		0		-0.4325	3.126		TCGA-AC-A2QJ-01	446		1		2.311	4.83		TCGA-AC-A62X-01	417		0		0.7058	3.096		TCGA-OL-A66N-01	792	0
	-9.966	0.7146		TCGA-B6-A1KC-01	1326		0		1.642	4.562		TCGA-D8-A1Y3-01	430		0		-0.2671	3.126		TCGA-AO-A03N-01	2031		0		2.345	4.834		TCGA-BH-A202-01	795		0		0.7493	3.101		TCGA-A2-A04U-01	2654	0
	-9.966	0.7146		TCGA-C8-A12U-01	385		0		1.749	4.564		TCGA-EW-A6SB-01	760		0		-0.2498	3.133		TCGA-A2-A3XV-01	996		0		2.447	4.847		TCGA-OL-A6VO-01	858		0		0.7579	3.119		TCGA-B6-A0IQ-01	4285	0
	-9.966	0.7321		TCGA-C8-A1HN-01	394		0		1.836	4.567		TCGA-A2-A0D3-01	1873		0		-0.2328	3.134		TCGA-AQ-A54O-01	1001		0		2.509	4.869		TCGA-BH-A0HK-01	178		0		0.8082	3.125		TCGA-B6-A0I2-01	4361	0
	-9.966	0.7493		TCGA-E9-A228-01	1285		0		1.86	4.571		TCGA-E2-A56Z-01	252		0		-0.2159	3.134		TCGA-AO-A0JB-01	1542		0		2.514	4.875		TCGA-E2-A14Y-01	2109		0		0.9493	3.125		TCGA-B6-A0WX-01	639	1
	-9.966	0.7493		TCGA-A8-A079-01	274		0		1.907	4.573		TCGA-E9-A1R7-01	1467		0		-0.1504	3.136		TCGA-OL-A5RW-01	1106		0		2.514	4.898		TCGA-AN-A04C-01	54		0		0.9493	3.126		TCGA-BH-A0BM-01	1876	0
	-9.966	0.7493		TCGA-PL-A8LX-01	5		0		1.919	4.577		TCGA-A8-A081-01	0		0		-0.1345	3.136		TCGA-LL-A6FR-01	489		0		2.526	4.928		TCGA-E9-A243-01	612		0		0.9642	3.126		TCGA-E2-A1LG-01	1523	0
	-9.966	0.7493		TCGA-BH-A204-01	2534		1		2.033	4.583		TCGA-E2-A1LG-01	1523		0		-0.1187	3.136		TCGA-A2-A3XU-01	912		1		2.536	4.948		TCGA-B6-A1KF-01	3088		0		1.022	3.154		TCGA-BH-A18G-01	149	0
	-9.966	0.7579		TCGA-B6-A0RM-01	2373		1		2.039	4.583		TCGA-C8-A1HK-01	366		0		-0.0877	3.143		TCGA-AO-A03T-01	2124		0		2.549	4.958		TCGA-A7-A13E-01	614		1		1.078	3.165		TCGA-E2-A1IF-01	1138	0
	-9.966	0.7916		TCGA-C8-A1HO-01	375		0		2.057	4.584		TCGA-AC-A3OD-01	451		0		-0.0877	3.144		TCGA-A2-A3XW-01	1712		0		2.633	4.964		TCGA-AN-A0AR-01	10		0		1.105	3.167		TCGA-A7-A6VW-01	285	0
	-9.966	0.7916		TCGA-A8-A09M-01	1006		0		2.065	4.589		TCGA-C8-A133-01	0		0		-0.0277	3.152		TCGA-AO-A1KR-01	2513		0		2.635	4.987		TCGA-E2-A1II-01	1025		0		1.138	3.183		TCGA-AO-A0JE-01	2335	0
	-9.966	0.8082		TCGA-EW-A1J1-01	575		0		2.074	4.592		TCGA-A8-A09G-01	0		0		-0.013	3.152		TCGA-AO-A03R-01	2091		0		2.696	4.997		TCGA-C8-A1HJ-01	5		0		1.177	3.186		TCGA-BH-A0HK-01	178	0
	-9.966	0.8082		TCGA-B6-A0IN-01	2573		1		2.091	4.592		TCGA-AR-A0TW-01	3009		0		0.03	3.154		TCGA-AO-A0J9-01	1613		0		2.705	5.015		TCGA-B6-A402-01	2281		0		1.245	3.202		TCGA-BH-A0DK-01	423	0
	-9.966	0.8246		TCGA-E2-A14S-01	1009		0		2.091	4.598		TCGA-A8-A09K-01	912		0		0.044	3.154		TCGA-A2-A04P-01	548		1		2.718	5.033		TCGA-B6-A0IQ-01	4285		0		1.27	3.205		TCGA-A2-A04Q-01	2385	0
	-9.966	0.8327		TCGA-AR-A24H-01	4894		0		2.095	4.599		TCGA-AR-A0U2-01	2551		1		0.044	3.157		TCGA-GM-A4E0-01	2191		0		2.738	5.048		TCGA-E2-A14N-01	1434		0		1.334	3.219		TCGA-BH-A0EE-01	943	0
	-9.966	0.8327		TCGA-AQ-A54N-01	78		0		2.111	4.602		TCGA-BH-A1FC-01	3472		1		0.099	3.157		TCGA-GM-A2DD-01	2282		0		2.822	5.061		TCGA-AN-A0FJ-01	242		0		1.334	3.225		TCGA-OL-A5RY-01	752	0
	-9.966	0.8408		TCGA-AQ-A54O-01	1001		0		2.141	4.607		TCGA-BH-A18T-01	224		1		0.1124	3.159		TCGA-OL-A66P-01	428		0		2.824	5.108		TCGA-AN-A04D-01	52		0		1.401	3.225		TCGA-C8-A131-01	411	0
	-9.966	0.8408		TCGA-S3-AA12-01	574		0		2.211	4.611		TCGA-BH-A1FG-01	3736		1		0.1519	3.162		TCGA-AN-A0FT-01	214		0		2.83	5.124		TCGA-A1-A0SO-01	852		0		1.412	3.228		TCGA-LL-A5YP-01	450	0
	-9.966	0.8568		TCGA-S3-AA17-01	424		0		2.242	4.614		TCGA-AO-A0JD-01	2190		0		0.1776	3.164		TCGA-GM-A2DA-01	6593		1		2.846	5.206		TCGA-A2-A0YJ-01	566		0		1.537	3.245		TCGA-AN-A04D-01	52	0
	-9.966	0.8647		TCGA-A2-A04V-01	1920		1		2.245	4.616		TCGA-AR-A0TV-01	2288		0		0.2154	3.164		TCGA-Z7-A8R5-01	3287		0		2.872	5.352		TCGA-E9-A22G-01	1239		0		1.556	3.257		TCGA-S3-AA15-01	525	0
	-9.966	0.8726		TCGA-3C-AAAU-01	4047		0		2.257	4.62		TCGA-E9-A1RB-01	976		1		0.24	3.165		TCGA-C8-A12Y-01	1476		0		2.895	5.471		TCGA-A2-A04Q-01	2385		0		1.571	3.257		TCGA-A2-A0CY-01	1673	0
	-9.966	0.8726		TCGA-BH-A0H0-01	461		0		2.257	4.622		TCGA-A8-A06O-01	396		0		0.2522	3.167		TCGA-GM-A2DC-01	2535		0		2.924	5.533		TCGA-W8-A86G-01	347	0			1.609	3.281		TCGA-A2-A0EV-01	968	0
	-9.966	0.8805		TCGA-A8-A06N-01	0		0		2.266	4.623		TCGA-AO-A03O-01	2483		1		0.2642	3.17		TCGA-E9-A5FK-01	812		0			5.62		TCGA-A2-A0T7-01	631	0			1.642	3.289		TCGA-A2-A0CV-01	3011	0
	-9.966	0.8961		TCGA-E2-A14O-01	1359		0		2.266	4.629		TCGA-AN-A0AK-01	224		0		0.3346	3.175		TCGA-E2-A576-01	1043		0			5.799		TCGA-BH-A0EA-01	991	1			1.656	3.302		TCGA-A7-A13D-01	965	0
	-9.966	0.8961		TCGA-AC-A2QH-01	1005		0		2.272	4.631		TCGA-A2-A0D1-01	1051		0		0.4016	3.177		TCGA-AC-A3QQ-01	734		0					TCGA-E9-A1NG-01	786	1			1.666	3.361		TCGA-A2-A0CZ-01	1616	0
	-9.966	0.9038		TCGA-E9-A3Q9-01	1001		0		2.308	4.631		TCGA-AN-A03Y-01	10		0		0.4233	3.18		TCGA-BH-A42U-01	3364		0					TCGA-AR-A0TP-01	4275	0			1.674	3.37		TCGA-C8-A135-01	393	0
	-9.966	0.9268		TCGA-BH-A6R8-01	293		0		2.311	4.636		TCGA-E9-A249-01	217		0		0.4447	3.181		TCGA-BH-A0DL-01	2381		0					TCGA-AR-A2LH-01	616	1			1.688	3.37		TCGA-A2-A0ST-01	3017	0
	-9.966	0.9268		TCGA-D8-A27E-01	530		0		2.311	4.638		TCGA-AC-A62X-01	417		0		0.4552	3.183		TCGA-GM-A2DB-01	2406		0					TCGA-A7-A6VV-01	313	0			1.692	3.373		TCGA-E9-A1NC-01	1203	0
	-9.966	0.9568		TCGA-C8-A12Y-01	1476		0		2.345	4.639		TCGA-A2-A1FW-01	528		0		0.4657	3.186		TCGA-WT-AB44-01	883		0					TCGA-AR-A1AU-01	2868	0			1.701	3.403		TCGA-AC-A62X-01	417	0
	-9.966	1.015		TCGA-D8-A1JI-01	577		0		2.362	4.654		TCGA-A2-A3XV-01	996		0		0.4967	3.186		TCGA-E2-A10C-01	1220		0					TCGA-D8-A27F-01	488	0			1.714	3.425		TCGA-BH-A0B9-01	1572	0
	-9.966	1.029		TCGA-BH-A0HW-01	1561		0		2.373	4.654		TCGA-OL-A5RZ-01	679		0		0.5069	3.192		TCGA-GM-A2DO-01	2596		0					TCGA-BH-A1EX-01	1508	1			1.714	3.456		TCGA-B6-A401-01	2596	0
	-9.966	1.029		TCGA-C8-A27A-01	747		0		2.398	4.656		TCGA-AO-A03P-01	2911		1		0.5568	3.202		TCGA-E9-A5FL-01	24		0					TCGA-LL-A441-01	996	0			1.723	3.464		TCGA-LD-A74U-01	402	0
	-9.966	1.036		TCGA-AN-A0FZ-01	10		0		2.401	4.657		TCGA-LL-A7SZ-01	594		0		0.5666	3.205		TCGA-LL-A8F5-01	596		0					TCGA-A1-A0SB-01	259	0			1.758	3.47		TCGA-B6-A3ZX-01	1152	1
	-9.966	1.057		TCGA-A8-A075-01	518		0		2.414	4.657		TCGA-C8-A1HG-01	345		0		0.5859	3.208		TCGA-C8-A26X-01	376		0					TCGA-AR-A2LQ-01	1233	0			1.766	3.492		TCGA-PL-A8LY-01	8	0
	-9.966	1.071		TCGA-A7-A3RF-01	408		0		2.414	4.657		TCGA-BH-A1F5-01	2712		1		0.5859	3.208		TCGA-LL-A5YM-01	466		0					TCGA-A2-A04W-01	3102	0			1.77	3.509		TCGA-AN-A0XO-01	375	0
	-9.966	1.071		TCGA-LL-A50Y-01	762		0		2.428	4.658		TCGA-A7-A3IZ-01	322		0		0.5955	3.213		TCGA-V7-A7HQ-01	2033		0					TCGA-AC-A23G-01	2248	0			1.774	3.512		TCGA-E9-A3QA-01	918	0
	-9.966	1.078		TCGA-BH-A42T-01	320		1		2.431	4.659		TCGA-A2-A0EQ-01	2426		0		0.5955	3.213		TCGA-A7-A56D-01	448		0					TCGA-BH-A1FH-01	1034	1			1.787	3.521		TCGA-A8-A0A6-01	640	0
	-9.966	1.092		TCGA-AO-A12H-01	1234		0		2.447	4.662		TCGA-BH-A202-01	795		0		0.6145	3.216		TCGA-BH-A5J0-01	715		0					TCGA-BH-A0BL-01	2278	0			1.795	3.522		TCGA-AO-A129-01	3286	0
	-9.966	1.112		TCGA-A2-A0ET-01	1066		0		2.447	4.666		TCGA-A7-A0DC-01	906		0		0.6332	3.219		TCGA-GM-A5PX-01	551		0					TCGA-AC-A2FK-01	2650	0			1.808	3.524		TCGA-LL-A5YL-01	519	0
	-9.966	1.112		TCGA-E2-A15G-01	554		0		2.455	4.668		TCGA-BH-A1F8-01	763		1		0.6425	3.219		TCGA-AO-A126-01	3307		0					TCGA-AO-A03U-01	1793	1			1.824	3.531		TCGA-A7-A6VY-01	266	0
	-9.966	1.132		TCGA-E9-A1RH-01	1417		0		2.467	4.668		TCGA-D8-A1XV-01	461		0		0.6517	3.22		TCGA-LL-A5YN-01	447		0					TCGA-LL-A440-01	759	0			1.832	3.549		TCGA-EW-A1P7-01	915	0
	-9.966	1.132		TCGA-A8-A08A-01	30		0		2.478	4.672		TCGA-AO-A0JI-01	1528		0		0.6608	3.222		TCGA-B6-A0IE-01	1993		1					TCGA-BH-A28O-01	1120	0			1.856	3.55		TCGA-A7-A26F-01	738	0
	-9.966	1.145		TCGA-AQ-A04L-01	3957		0		2.483	4.672		TCGA-A7-A0DB-01	1007		0		0.6933	3.225		TCGA-AC-A3OD-01	451		0					TCGA-C8-A134-01	383	0			1.868	3.551		TCGA-C8-A12K-01	0	0
	-9.966	1.145		TCGA-AR-A1AN-01	2920		0		2.489	4.673		TCGA-BH-A209-01	3959		1		0.6969	3.225		TCGA-BH-A8FY-01	295		1					TCGA-AC-A3YI-01	707	0			1.876	3.552		TCGA-AO-A0J2-01	997	0
	-9.966	1.164		TCGA-AO-A126-01	3307		0		2.496	4.674		TCGA-A8-A06T-01	1614		0		0.7058	3.225		TCGA-E2-A1LS-01	1604		0					TCGA-D8-A147-01	584	0			1.9	3.56		TCGA-BH-A8FZ-01	574	0
	-9.966	1.177		TCGA-AR-A0TR-01	160		1		2.501	4.679		TCGA-B6-A0RL-01	2469		1		0.7146	3.228		TCGA-AC-A3TM-01	762		0					TCGA-D8-A4Z1-01	659	0			1.9	3.572		TCGA-LD-A9QF-01	323	0
	-9.966	1.183		TCGA-EW-A1OX-01	911		0		2.504	4.681		TCGA-A8-A08X-01	1308		0		0.7146	3.23		TCGA-WT-AB41-01	1611		0					TCGA-D8-A27H-01	397	0			1.93	3.588		TCGA-D8-A1XW-01	1309	0
	-9.966	1.19		TCGA-C8-A12X-01	385		0		2.506	4.684		TCGA-OL-A6VO-01	858		0		0.7146	3.23		TCGA-LL-A6FQ-01	80		0					TCGA-A2-A4RY-01	648	0			1.934	3.61		TCGA-AR-A1AI-01	3296	0
	-9.966	1.202		TCGA-3C-AALJ-01	1474		0		2.509	4.688		TCGA-AO-A1KP-01	2953		0		0.7233	3.233		TCGA-LL-A9Q3-01	532		0					TCGA-BH-A0BW-01	2371	0			1.945	3.643		TCGA-AO-A12E-01	2142	0
	-9.966	1.202		TCGA-E2-A10A-01	1229		0		2.511	4.691		TCGA-A8-A08C-01	881		0		0.7321	3.234		TCGA-EW-A1J6-01	875		0					TCGA-B6-A0I6-01	991	1			1.945	3.646		TCGA-A2-A04W-01	3102	0
	-9.966	1.221		TCGA-AC-A62V-01	348		1		2.514	4.693		TCGA-BH-A0HK-01	178		0		0.7321	3.24		TCGA-B6-A408-01	2072		0					TCGA-A2-A4RX-01	742	0			1.945	3.653		TCGA-UU-A93S-01	116	1
	-9.966	1.221		TCGA-BH-A0W3-01	728		0		2.514	4.696		TCGA-E2-A14Y-01	2109		0		0.7493	3.242		TCGA-OL-A66N-01	792		0										1.964	3.658		TCGA-AN-A04C-01	54	0
	-9.966	1.245		TCGA-AN-A0FT-01	214		0		2.514	4.702		TCGA-AR-A0U3-01	4080		0		0.7579	3.242		TCGA-A2-A04U-01	2654		0										1.967	3.707		TCGA-AR-A5QP-01	1185	0
	-9.966	1.245		TCGA-E2-A15T-01	1563		0		2.519	4.702		TCGA-5T-A9QA-01	303		0		0.7579	3.245		TCGA-E9-A6HE-01	847		0										1.967	3.782		TCGA-E2-A573-01	1062	0
	-9.966	1.258		TCGA-LL-A442-01	889		0		2.521	4.709		TCGA-AN-A04C-01	54		0		0.7664	3.247		TCGA-E2-A14O-01	1359		0										1.997	3.828		TCGA-BH-A0BQ-01	2255	0
	-9.966	1.27		TCGA-C8-A12T-01	0		0		2.526	4.712		TCGA-E9-A1RE-01	1419		0		0.7748	3.25		TCGA-EW-A6SB-01	760		0										2	3.908		TCGA-B6-A0IK-01	571	1
	-9.966	1.276		TCGA-AO-A0J8-01	680		0		2.529	4.714		TCGA-E9-A243-01	612		0		0.7916	3.25		TCGA-E2-A1LA-01	748		0										2.008	3.962		TCGA-C8-A12V-01	385	0
	-9.966	1.276		TCGA-A8-A09Z-01	0		0		2.536	4.714		TCGA-B6-A0IA-01	8391		0		0.8082	3.254		TCGA-B6-A0IQ-01	4285		0										2.008	4.119		TCGA-D8-A147-01	584	0
	-9.966	1.288		TCGA-B6-A0RP-01	3126		1		2.539	4.721		TCGA-B6-A1KF-01	3088		0		0.8246	3.257		TCGA-E2-A2P6-01	1051		0										2.008	4.149		TCGA-AR-A2LH-01	616	1
	-9.966	1.311		TCGA-E9-A22A-01	1189		0		2.549	4.724		TCGA-E2-A14T-01	2311		0		0.8246	3.257		TCGA-A2-A0CP-01	2813		0										2.015	4.231		TCGA-AO-A03U-01	1793	1
	-9.966	1.34		TCGA-A8-A0A9-01	822		0		2.573	4.728		TCGA-B6-A1KC-01	1326		0		0.8327	3.259		TCGA-A2-A04X-01	1686		0										2.015	4.444		TCGA-AO-A0J6-01	1140	0
	-9.966	1.345		TCGA-D8-A1Y1-01	302		1		2.578	4.732		TCGA-C8-A278-01	297		0		0.8647	3.262		TCGA-A2-A3Y0-01	1546		0										2.025	4.468		TCGA-GM-A2DN-01	3091	0
	-9.966	1.357		TCGA-AO-A12B-01	2989		0		2.583	4.736		TCGA-E2-A574-01	1179		0		0.8647	3.265		TCGA-E2-A1B5-01	984		0										2.029	4.951		TCGA-A2-A0T7-01	631	0
	-9.966	1.368		TCGA-LL-A6FQ-01	80		0		2.59	4.736		TCGA-AC-A3QQ-01	734		0		0.8726	3.265		TCGA-E2-A14W-01	974		0										2.029			TCGA-D8-A1JL-01	611		0
	-9.966	1.368		TCGA-D8-A1XZ-01	466		0		2.598	4.741		TCGA-C8-A12U-01	385		0		0.8726	3.268		TCGA-LD-A66U-01	646		0													TCGA-BH-A1EO-01	2798		1
	-9.966	1.396		TCGA-LL-A5YM-01	466		0		2.607	4.748		TCGA-A8-A07B-01	1308		0		0.8805	3.274		TCGA-BH-A0B0-01	2477		0													TCGA-C8-A134-01	383		0
	-9.966	1.428		TCGA-E9-A1R6-01	339		0		2.609	4.755		TCGA-AO-A03N-01	2031		0		0.9038	3.277		TCGA-GM-A2DF-01	2155		0													TCGA-AC-A2FB-01	1234		0
	-9.966	1.444		TCGA-A2-A0SV-01	825		1		2.618	4.757		TCGA-A7-A13E-01	614		1		0.9115	3.28		TCGA-GM-A2DL-01	3519		0													TCGA-AR-A252-01	2838		0
	-9.966	1.449		TCGA-E9-A5UO-01	785		0		2.633	4.759		TCGA-AN-A0AR-01	10		0		0.9268	3.281		TCGA-B6-A0I5-01	8556		0													TCGA-AO-A0J4-01	1587		0
	-9.966	1.449		TCGA-A8-A07Z-01	1371		0		2.635	4.761		TCGA-AO-A0J7-01	618		0		0.9343	3.284		TCGA-B6-A0IN-01	2573		1													TCGA-D8-A142-01	425		0
	-9.966	1.465		TCGA-A2-A0EP-01	3603		0		2.642	4.761		TCGA-AN-A0AJ-01	303		0		0.9493	3.287		TCGA-B6-A0I2-01	4361		0													TCGA-E2-A150-01	1935		0
	-9.966	1.465		TCGA-E9-A22E-01	1269		0		2.649	4.762		TCGA-AO-A1KR-01	2513		0		0.9493	3.289		TCGA-B6-A0WX-01	639		1													TCGA-AR-A24U-01	3128		0
	-9.966	1.465		TCGA-D8-A1X9-01	727		0		2.66	4.764		TCGA-BH-A0HN-01	516		0		0.9568	3.29		TCGA-PE-A5DC-01	1430		1													TCGA-AQ-A04J-01	819		0
	-9.966	1.47		TCGA-AO-A0JM-01	2184		0		2.665	4.766		TCGA-E2-A10C-01	1220		0		0.9642	3.29		TCGA-BH-A0BM-01	1876		0													TCGA-EW-A1PG-01	1051		0
	-9.966	1.47		TCGA-AC-A7VC-01	1		0		2.665	4.77		TCGA-B6-A0IE-01	1993		1		0.9716	3.294		TCGA-D8-A1Y3-01	430		0													TCGA-A7-A5ZW-01	326		0
	-9.966	1.486		TCGA-EW-A1P0-01	1251		0		2.665	4.776		TCGA-BH-A203-01	1174		1		0.9789	3.297		TCGA-E2-A1LH-01	3247		0													TCGA-EW-A1OW-01	694		0
	-9.966	1.496		TCGA-AC-A3W6-01	602		0		2.669	4.78		TCGA-B6-A0X0-01	3945		1		1.001	3.297		TCGA-AO-A1KQ-01	1882		0													TCGA-AR-A1AU-01	2868		0
	-9.966	1.501		TCGA-AO-A0J5-01	792		1		2.683	4.783		TCGA-EW-A1OZ-01	1229		0		1.008	3.297		TCGA-E2-A1B6-01	867		0													TCGA-LL-A73Y-01	477		0
	-9.966	1.506		TCGA-A7-A6VX-01	317		0		2.694	4.789		TCGA-BH-A1FD-01	1009		1		1.008	3.3		TCGA-EW-A1OV-01	789		0													TCGA-BH-A28Q-01	1119		0
	-9.966	1.564		TCGA-BH-A0HL-01	72		0		2.696	4.79		TCGA-BH-A0AW-01	622		0		1.022	3.302		TCGA-E2-A1LG-01	1523		0													TCGA-BH-A1FU-01	1688		1
	-9.966	1.605		TCGA-A2-A4S1-01	820		0		2.696	4.793		TCGA-E2-A1II-01	1025		0		1.022	3.303		TCGA-E9-A22D-01	1248		0													TCGA-S3-A6ZF-01	572		0
	-6.506	1.614		TCGA-A8-A06Z-01	31		0		2.696	4.794		TCGA-C8-A1HN-01	394		0		1.036	3.305		TCGA-D8-A1XL-01	606		0													TCGA-C8-A27B-01	439		0
	-6.506	1.633		TCGA-A8-A09K-01	912		0		2.703	4.795		TCGA-C8-A1HJ-01	5		0		1.043	3.306		TCGA-A2-A04Y-01	1099		0													TCGA-AR-A5QN-01	1013		0
	-6.506	1.647		TCGA-AR-A0U2-01	2551		1		2.705	4.795		TCGA-A8-A09Q-01	761		0		1.057	3.321		TCGA-A2-A4S1-01	820		0													TCGA-AQ-A1H3-01	989		0
	-6.506	1.656		TCGA-BH-A1FC-01	3472		1		2.707	4.797		TCGA-AR-A2LE-01	5062		0		1.078	3.323		TCGA-BH-A18G-01	149		0													TCGA-BH-A0H3-01	1928		0
	-6.506	1.66		TCGA-A8-A06O-01	396		0		2.716	4.801		TCGA-B6-A402-01	2281		0		1.092	3.325		TCGA-A2-A0SW-01	1365		1													TCGA-GI-A2C9-01	3342		0
	-6.506	1.688		TCGA-AN-A0AK-01	224		0		2.718	4.801		TCGA-EW-A1J6-01	875		0		1.098	3.326		TCGA-GM-A2DK-01	2645		0													TCGA-EW-A1J2-01	403		0
	-6.506	1.688		TCGA-LL-A7SZ-01	594		0		2.723	4.804		TCGA-E2-A15J-01	1640		0		1.105	3.331		TCGA-E2-A1IF-01	1138		0													TCGA-A2-A0T0-01	533		0
	-6.506	1.696		TCGA-A7-A3IZ-01	322		0		2.723	4.805		TCGA-A8-A091-01	1004		0		1.112	3.332		TCGA-B6-A409-01	573		1													TCGA-AR-A2LM-01	1935		0
	-6.506	1.696		TCGA-AO-A0JI-01	1528		0		2.729	4.805		TCGA-E2-A15R-01	1732		0		1.132	3.334		TCGA-GM-A2D9-01	1812		1													TCGA-D8-A27L-01	499		0
	-6.506	1.71		TCGA-A8-A06T-01	1614		0		2.731	4.811		TCGA-B6-A0IQ-01	4285		0		1.138	3.336		TCGA-A7-A6VW-01	285		0													TCGA-A2-A1G0-01	616		0
	-6.506	1.719		TCGA-B6-A0IA-01	8391		0		2.738	4.811		TCGA-E9-A228-01	1285		0		1.145	3.338		TCGA-C8-A138-01	380		0													TCGA-A2-A0YE-01	554		0
	-6.506	1.727		TCGA-AN-A0AJ-01	303		0		2.747	4.812		TCGA-A7-A26E-01	954		0		1.158	3.342		TCGA-OL-A66L-01	1301		0													TCGA-A2-A0D2-01	1027		0
	-6.506	1.749		TCGA-BH-A0HN-01	516		0		2.748	4.816		TCGA-A8-A079-01	274		0		1.158	3.353		TCGA-E2-A572-01	1208		0													TCGA-BH-A0WA-01	701		0
	-6.506	1.762		TCGA-AN-A046-01	10		0		2.757	4.824		TCGA-GM-A2DC-01	2535		0		1.164	3.356		TCGA-E9-A3HO-01	1158		0													TCGA-AO-A124-01	3506		0
	-6.506	1.774		TCGA-AO-A0J3-01	651		0		2.759	4.824		TCGA-GM-A3XL-01	2108		0		1.177	3.356		TCGA-AO-A0JE-01	2335		0													TCGA-C8-A12Q-01	385		1
	-6.506	1.799		TCGA-EW-A2FW-01	672		0		2.761	4.825		TCGA-AR-A256-01	2854		1		1.196	3.358		TCGA-C8-A1HG-01	345		0													TCGA-D8-A1JH-01	426		0
	-6.506	1.799		TCGA-A8-A07W-01	304		0		2.776	4.828		TCGA-A2-A3XT-01	2770		0		1.196	3.361		TCGA-B6-A0RH-01	6456		1													TCGA-AO-A0JD-01	2190		0
	-6.506	1.812		TCGA-D8-A1XC-01	377		1		2.78	4.83		TCGA-PL-A8LX-01	5		0		1.202	3.363		TCGA-BH-A0DH-01	1156		0													TCGA-D8-A1XO-01	1682		0
	-6.506	1.812		TCGA-E2-A156-01	726		0		2.783	4.83		TCGA-A8-A092-01	942		0		1.209	3.365		TCGA-BH-A0E6-01	293		0													TCGA-D8-A27K-01	1461		0
	-6.506	1.816		TCGA-E9-A5FL-01	24		0		2.783	4.834		TCGA-E9-A22D-01	1248		0		1.239	3.365		TCGA-BH-A0RX-01	170		0													TCGA-D8-A27P-01	49		0
	-6.506	1.832		TCGA-A8-A08F-01	1004		0		2.806	4.847		TCGA-AN-A046-01	10		0		1.245	3.37		TCGA-BH-A0HK-01	178		0													TCGA-E2-A1B0-01	1631		0
	-6.506	1.832		TCGA-A2-A4S0-01	706		0		2.808	4.847		TCGA-EW-A1J3-01	504		0		1.245	3.37		TCGA-AO-A0JC-01	1547		0													TCGA-BH-A0BW-01	2371		0
	-6.506	1.836		TCGA-A8-A083-01	0		0		2.812	4.853		TCGA-E2-A14N-01	1434		0		1.258	3.373		TCGA-OL-A5S0-01	620		0													TCGA-A8-A08R-01	30		0
	-6.506	1.864		TCGA-A8-A099-01	304		0		2.822	4.866		TCGA-AN-A0FJ-01	242		0		1.27	3.386		TCGA-BH-A0DK-01	423		0													TCGA-E2-A1IU-01	337		0
	-6.506	1.868		TCGA-D8-A1JS-01	371		0		2.824	4.867		TCGA-A7-A0CJ-01	931		0		1.276	3.39		TCGA-E2-A9RU-01	538		0													TCGA-BH-A1F6-01	2965		1
	-6.506	1.896		TCGA-E2-A105-01	1308		0		2.828	4.868		TCGA-AN-A04D-01	52		0		1.293	3.392		TCGA-BH-A0B4-01	1191		0													TCGA-AN-A0G0-01	16		0
	-6.506	1.911		TCGA-A8-A07L-01	975		0		2.83	4.869		TCGA-BH-A204-01	2534		1		1.293	3.397		TCGA-AN-A03X-01	10		0													TCGA-AC-A2B8-01	677		0
	-6.506	1.923		TCGA-BH-A0HU-01	392		0		2.832	4.869		TCGA-AN-A0FW-01	11		0		1.305	3.402		TCGA-GM-A3NY-01	1162		0													TCGA-BH-A1FB-01	3669		1
	-6.506	1.93		TCGA-AC-A7VB-01	250		0		2.832	4.87		TCGA-B6-A0RM-01	2373		1		1.317	3.402		TCGA-BH-A0AW-01	622		0													TCGA-A2-A0CM-01	754		1
	-6.506	1.934		TCGA-AN-A0XR-01	10		0		2.838	4.871		TCGA-C8-A1HO-01	375		0		1.328	3.403		TCGA-BH-A1FC-01	3472		1													TCGA-D8-A27M-01	410		0
	-6.506	1.949		TCGA-BH-A0DD-01	2486		0		2.838	4.875		TCGA-A2-A0YG-01	666		0		1.328	3.412		TCGA-BH-A0GZ-01	328		0													TCGA-A7-A0DA-01	1085		0
	-6.506	1.956		TCGA-B6-A0IC-01	1542		1		2.844	4.888		TCGA-A1-A0SO-01	852		0		1.334	3.413		TCGA-A2-A04Q-01	2385		0													TCGA-OL-A6VO-01	858		0
	-6.506	1.975		TCGA-A2-A0YC-01	990		0		2.846	4.898		TCGA-AR-A1AW-01	2632		0		1.334	3.418		TCGA-BH-A0EE-01	943		0													TCGA-A7-A26G-01	722		0
	-6.506	1.982		TCGA-B6-A0X4-01	860		1		2.852	4.91		TCGA-Z7-A8R6-01	3256		0		1.34	3.424		TCGA-BH-A0W7-01	1363		0													TCGA-AR-A1AL-01	2971		0
	-6.506	1.986		TCGA-A8-A0AD-01	1157		0		2.856	4.922		TCGA-A8-A09M-01	1006		0		1.34	3.425		TCGA-JL-A3YW-01	360		0													TCGA-BH-A1F0-01	785		1
	-6.506	1.993		TCGA-D8-A1JE-01	575		0		2.866	4.928		TCGA-A2-A0YJ-01	566		0		1.357	3.428		TCGA-BH-A0DV-01	2064		0													TCGA-A2-A1G1-01	584		0
	-6.506	1.997		TCGA-A8-A082-01	549		0		2.872	4.935		TCGA-AO-A0J3-01	651		0		1.373	3.429		TCGA-PL-A8LV-01	0		0													TCGA-BH-A1EX-01	1508		1
	-6.506	2.033		TCGA-AN-A0FF-01	172		0		2.878	4.947		TCGA-D8-A1X7-01	509		0		1.373	3.441		TCGA-AC-A3W6-01	602		0													TCGA-AR-A1AY-01	1026		0
	-6.506	2.06		TCGA-EW-A1P3-01	1611		0		2.878	4.948		TCGA-BH-A18L-01	811		1		1.379	3.445		TCGA-C8-A8HP-01	396		0													TCGA-BH-A18T-01	224		1
	-6.506	2.064		TCGA-A7-A56D-01	448		0		2.882	4.951		TCGA-C8-A26X-01	376		0		1.39	3.446		TCGA-AR-A2LJ-01	2632		0													TCGA-D8-A27F-01	488		0
	-6.506	2.084		TCGA-D8-A1JJ-01	611		0		2.886	4.958		TCGA-E9-A22G-01	1239		0		1.401	3.45		TCGA-A2-A0T2-01	255		1													TCGA-AR-A0TY-01	1699		1
	-6.506	2.108		TCGA-A8-A09D-01	1522		0		2.895	4.964		TCGA-AC-A2BM-01	3022		0		1.401	3.452		TCGA-A8-A06R-01	547		0													TCGA-AR-A2LR-01	1742		0
	-6.506	2.125		TCGA-D8-A27T-01	398		0		2.897	4.974		TCGA-A8-A09X-01	426		1		1.401	3.453		TCGA-OL-A5RY-01	752		0													TCGA-AC-A2BK-01	2222		0
	-6.506	2.125		TCGA-D8-A140-01	403		0		2.903	4.982		TCGA-EW-A2FW-01	672		0		1.406	3.454		TCGA-E2-A56Z-01	252		0													TCGA-BH-A18V-01	1556		1
	-6.506	2.125		TCGA-A2-A25B-01	1291		0		2.922	4.987		TCGA-A2-A04Q-01	2385		0		1.412	3.456		TCGA-C8-A131-01	411		0													TCGA-A7-A0CE-01	1074		0
	-6.506	2.148		TCGA-E9-A1N6-01	678		1		2.924	4.997		TCGA-OL-A5D8-01	973		0		1.417	3.458		TCGA-B6-A0I1-01	2361		1													TCGA-B6-A0WT-01	5739		0
	-6.506	2.164		TCGA-PE-A5DD-01	1953		0		2.93	5.001		TCGA-E2-A1LH-01	3247		0		1.423	3.464		TCGA-A2-A0CQ-01	2695		0													TCGA-A1-A0SO-01	852		0
	-6.506	2.221		TCGA-A8-A08Z-01	1217		0		2.938	5.015		TCGA-EW-A1J1-01	575		0		1.439	3.467		TCGA-C8-A1HK-01	366		0													TCGA-D8-A1XQ-01	499		0
	-6.506	2.227		TCGA-A7-A4SF-01	545		0		2.943	5.017		TCGA-A8-A07U-01	760		0		1.439	3.469		TCGA-E9-A1RG-01	647		0													TCGA-AN-A0AT-01	10		0
	-6.506	2.248		TCGA-E9-A226-01	1048		1		2.951	5.033		TCGA-BH-A0B8-01	1569		0		1.444	3.47		TCGA-C8-A3M7-01	1034		1													TCGA-A8-A07C-01	1034		0
	-6.506	2.251		TCGA-E2-A572-01	1208		0		2.967	5.033		TCGA-A2-A1FV-01	714		0		1.449	3.483		TCGA-GM-A3XL-01	2108		0													TCGA-A2-A0YJ-01	566		0
	-5.823	2.251		TCGA-A7-A0DC-01	906		0		2.971	5.04		TCGA-E2-A14X-01	972		0		1.47	3.483		TCGA-AR-A1AW-01	2632		0
	-5.574	2.305		TCGA-E2-A56Z-01	252		0		2.975	5.047		TCGA-C8-A12Z-01	382		0		1.476	3.489		TCGA-A7-A6VX-01	317		0
	-5.574	2.331		TCGA-C8-A133-01	0		0		2.975	5.048		TCGA-AR-A1AT-01	1272		1		1.486	3.492		TCGA-AN-A046-01	10		0
	-5.574	2.37		TCGA-A2-A3XV-01	996		0		2.975	5.056		TCGA-D8-A1XL-01	606		0		1.486	3.496		TCGA-S3-A6ZG-01	562		0
	-5.574	2.417		TCGA-OL-A5RZ-01	679		0		2.982	5.061		TCGA-AO-A0JB-01	1542		0		1.486	3.497		TCGA-EW-A423-01	533		0
	-5.574	2.422		TCGA-D8-A1XV-01	461		0		2.982	5.079		TCGA-LL-A5YO-01	440		0		1.496	3.505		TCGA-OL-A66O-01	528		0
	-5.574	2.457		TCGA-A8-A08C-01	881		0		2.997	5.091		TCGA-B6-A0I1-01	2361		1		1.496	3.506		TCGA-D8-A1Y2-01	433		0
	-5.574	2.465		TCGA-EW-A1OZ-01	1229		0		3	5.108		TCGA-AC-A23H-01	174		1		1.496	3.509		TCGA-BH-A0HA-01	1611		0
	-5.574	2.473		TCGA-A8-A09Q-01	761		0		3.002	5.124		TCGA-C8-A1HM-01	375		0		1.506	3.509		TCGA-BH-A0DS-01	78		0
	-5.574	2.473		TCGA-AR-A1AW-01	2632		0		3.006	5.168		TCGA-E9-A245-01	26		0		1.506	3.51		TCGA-EW-A2FS-01	1604		0
	-5.574	2.493		TCGA-A2-A0YF-01	1535		0		3.013	5.178		TCGA-B6-A0IN-01	2573		1		1.512	3.512		TCGA-BH-A6R8-01	293		0
	-5.574	2.499		TCGA-C8-A12M-01	358		0		3.014	5.181		TCGA-AR-A24K-01	1548		0		1.516	3.512		TCGA-E9-A1NA-01	1112		0
	-5.574	2.504		TCGA-E9-A1N3-01	1059		0		3.016	5.205		TCGA-A7-A26J-01	627		0		1.522	3.517		TCGA-BH-A0HU-01	392		0
	-5.574	2.544		TCGA-A8-A09W-01	30		0		3.018	5.206		TCGA-D8-A1JN-01	620		0		1.527	3.519		TCGA-E9-A22E-01	1269		0
	-5.574	2.546		TCGA-AO-A1KQ-01	1882		0		3.02	5.227		TCGA-B6-A0IK-01	571		1		1.532	3.521		TCGA-A2-A0EP-01	3603		0
	-5.574	2.554		TCGA-B6-A0RH-01	6456		1		3.022	5.245		TCGA-E2-A14S-01	1009		0		1.537	3.521		TCGA-LL-A5YP-01	450		0
	-5.574	2.573		TCGA-BH-A18S-01	2009		1		3.027	5.291		TCGA-E9-A3HO-01	1158		0		1.541	3.522		TCGA-BH-A0BZ-01	2255		0
	-5.574	2.607		TCGA-AC-A5XU-01	455		0		3.03	5.352		TCGA-E9-A248-01	59		0		1.546	3.524		TCGA-AR-A5QQ-01	322		1
	-5.574	2.683		TCGA-B6-A0I5-01	8556		0		3.03	5.362		TCGA-AO-A12G-01	1639		0		1.546	3.524		TCGA-BH-A0DP-01	476		0
	-5.574	2.69		TCGA-E9-A24A-01	747		0		3.036	5.43		TCGA-A2-A25D-01	552		0		1.556	3.531		TCGA-AN-A04D-01	52		0
	-5.574	2.723		TCGA-OL-A66H-01			0		3.038	5.471		TCGA-E9-A247-01	1186		0		1.561	3.532		TCGA-A2-A0SV-01	825		1
	-5.574	2.778		TCGA-C8-A26Z-01	470		0		3.038	5.504		TCGA-GM-A5PV-01	412		0		1.571	3.537		TCGA-S3-AA15-01	525		0
	-5.574	2.791		TCGA-D8-A1X6-01	541		0		3.045	5.533		TCGA-BH-A18R-01	1142		1		1.571	3.542		TCGA-B6-A0IB-01	3941		1
	-5.574	2.83		TCGA-E2-A9RU-01	538		0		3.05	5.62		TCGA-A7-A13G-01	718		0		1.576	3.546		TCGA-LL-A73Z-01	227		1
	-5.574	2.842		TCGA-A8-A0A1-01	365		0		3.051	5.799		TCGA-B6-A0RS-01	3063		1		1.585	3.549		TCGA-OL-A5RZ-01	679		0
	-5.574	2.913		TCGA-EW-A423-01	533		0		3.055	6.757		TCGA-A2-A0YE-01	554	0			1.595	3.55		TCGA-A2-A0T4-01	624		0
	-5.574	2.932		TCGA-OL-A66P-01	428		0					TCGA-B6-A0WV-01	2417	1			1.595	3.55		TCGA-B6-A400-01	215		0
	-5.574	2.953		TCGA-D8-A27R-01	307		0					TCGA-D8-A27N-01	519	0			1.6	3.551		TCGA-BH-A18H-01	652		0
	-5.574	2.962		TCGA-E9-A1RF-01	200		0					TCGA-EW-A1J2-01	403	0			1.609	3.552		TCGA-A2-A0CY-01	1673		0
	-5.574	2.975		TCGA-D8-A1X5-01	565		0					TCGA-AR-A0TQ-01	2991	0			1.609	3.555		TCGA-OL-A5D6-01	1104		1
	-5.574	2.977		TCGA-AC-A5EH-01	511		0					TCGA-AQ-A04J-01	819	0			1.614	3.56		TCGA-BH-A0HB-01	806		0
	-5.574	3.004		TCGA-A8-A085-01	1124		0					TCGA-D8-A1X9-01	727	0			1.619	3.568		TCGA-A2-A0D1-01	1051		0
	-5.574	3.023		TCGA-A2-A1FX-01	1847		0					TCGA-A2-A0CU-01	158	1			1.622	3.572		TCGA-A7-A0DB-01	1007		0
	-5.574	3.027		TCGA-LL-A9Q3-01	532		0					TCGA-EW-A1P1-01	1210	0			1.642	3.573		TCGA-C8-A130-01	370		0
	-5.574	3.043		TCGA-B6-A40B-01	3152		0					TCGA-AN-A0FN-01	218	0			1.642	3.586		TCGA-A2-A0EV-01	968		0
	-5.574	3.052		TCGA-BH-A1FJ-01	1927		1					TCGA-B6-A0WX-01	639	1			1.656	3.588		TCGA-A8-A0A7-01	30		0
	-5.574	3.144		TCGA-D8-A1XU-01	395		0					TCGA-Z7-A8R5-01	3287	0			1.656	3.608		TCGA-A2-A0CV-01	3011		0
	-5.574	3.156		TCGA-A8-A07J-01	365		0					TCGA-MS-A51U-01	681	0			1.666	3.61		TCGA-A7-A13D-01	965		0
	-5.574	3.184		TCGA-BH-A5J0-01	715		0					TCGA-AN-A0XL-01	163	0			1.674	3.621		TCGA-A2-A0CZ-01	1616		0
	-5.574	3.186		TCGA-E9-A1N5-01	1120		0					TCGA-BH-A0AV-01	1820	0			1.679	3.622		TCGA-BH-A0DZ-01	495		0
	-5.574	3.188		TCGA-D8-A1XF-01	463		0					TCGA-OL-A66L-01	1301	0			1.683	3.623		TCGA-LL-A50Y-01	762		0
	-5.574	3.189		TCGA-E9-A1RG-01	647		0					TCGA-A8-A0A4-01	396	0			1.683	3.624		TCGA-EW-A1P3-01	1611		0
	-5.574	3.192		TCGA-A2-A0T6-01	575		0					TCGA-BH-A18M-01	2207	1			1.688	3.635		TCGA-E2-A1L8-01	2240		0
	-5.574	3.2		TCGA-AN-A0FY-01	10		0					TCGA-EW-A1PD-01	424	0			1.688	3.641		TCGA-C8-A135-01	393		0
	-5.574	3.24		TCGA-D8-A1XT-01	506		0					TCGA-E2-A14U-01	1318	0			1.692	3.643		TCGA-A2-A0ST-01	3017		0
	-5.322	3.292		TCGA-A7-A13G-01	718		0					TCGA-D8-A1XA-01	839	0			1.692	3.643		TCGA-A7-A5ZV-01	368		0
	-5.012	3.312		TCGA-A8-A09G-01	0		0					TCGA-A7-A425-01	447	0			1.701	3.644		TCGA-E9-A1NC-01	1203		0
	-5.012	3.319		TCGA-E2-A10C-01	1220		0					TCGA-A2-A0EO-01	2442	0			1.705	3.646		TCGA-E2-A1B4-01	1004		1
	-5.012	3.341		TCGA-A8-A08J-01	1127		1					TCGA-A7-A4SB-01	418	0			1.705	3.647		TCGA-D8-A27N-01	519		0
	-5.012	3.342		TCGA-A8-A093-01	546		0					TCGA-B6-A0RO-01	4929	0			1.707	3.651		TCGA-AC-A2QH-01	1005		0
	-5.012	3.356		TCGA-E2-A576-01	1043		0					TCGA-AR-A0TS-01	2558	0			1.714	3.653		TCGA-AC-A62X-01	417		0
	-5.012	3.359		TCGA-E9-A22H-01	1232		0					TCGA-AC-A8OS-01	70	0			1.714	3.658		TCGA-BH-A0B9-01	1572		0
	-5.012	3.372		TCGA-C8-A1HE-01	375		0					TCGA-A8-A08Z-01	1217	0			1.719	3.664		TCGA-E2-A1IJ-01	865		0
	-5.012	3.391		TCGA-AR-A1AV-01	1864		0					TCGA-BH-A0BR-01	2330	0			1.723	3.667		TCGA-A2-A0CX-01	1728		0
	-5.012	3.401		TCGA-E2-A1IH-01	1026		0					TCGA-C8-A12W-01	385	0			1.723	3.671		TCGA-A7-A26I-01	661		0
	-5.012	3.42		TCGA-AC-A3TN-01	456		0					TCGA-AO-A0JM-01	2184	0			1.723	3.677		TCGA-B6-A401-01	2596		0
	-5.012	3.444		TCGA-E2-A14W-01	974		0					TCGA-C8-A8HR-01	408	0			1.732	3.677		TCGA-A8-A09M-01	1006		0
	-5.012	3.454		TCGA-WT-AB41-01	1611		0					TCGA-A8-A07R-01	273	0			1.74	3.68		TCGA-AC-A7VC-01	1		0
	-5.012	3.479		TCGA-BH-A1EV-01	365		1					TCGA-A1-A0SH-01	1437	0			1.753	3.684		TCGA-AC-A3QP-01	675		0
	-5.012	3.53		TCGA-A8-A076-01	1642		0					TCGA-D8-A1JH-01	426	0			1.758	3.693		TCGA-LD-A74U-01	402		0
	-5.012	3.583		TCGA-A2-A0ER-01	2263		0					TCGA-GM-A3XN-01	2019	0			1.766	3.695		TCGA-B6-A3ZX-01	1152		1
	-5.012	3.639		TCGA-GM-A2D9-01	1812		1					TCGA-D8-A27L-01	499	0			1.766	3.698		TCGA-A8-A06U-01	883		1
	-5.012	3.677		TCGA-E2-A1IN-01	675		0					TCGA-B6-A0I9-01	362	1			1.77	3.707		TCGA-AO-A125-01	3456		0
	-5.012	3.702		TCGA-D8-A1XK-01	441		0					TCGA-A7-A4SF-01	545	0			1.77	3.721		TCGA-PL-A8LY-01	8		0
	-5.012	3.705		TCGA-A8-A096-01	0		0					TCGA-A7-A13F-01	765	0			1.774	3.73		TCGA-AN-A0XO-01	375		0
	-5.012	3.707		TCGA-D8-A1JA-01	502		0					TCGA-AN-A0FX-01	10	0			1.774	3.731		TCGA-GM-A3XN-01	2019		0
	-5.012	3.764		TCGA-GM-A2DD-01	2282		0					TCGA-BH-A0E9-01	2489	0			1.774	3.744		TCGA-LD-A7W5-01	216		0
	-5.012	3.774		TCGA-GM-A2DL-01	3519		0					TCGA-AC-A7VC-01	1	0			1.783	3.744		TCGA-E2-A152-01	2128		0
	-5.012	3.861		TCGA-EW-A3E8-01	1035		0					TCGA-E2-A153-01	707	0			1.787	3.745		TCGA-LL-A6FP-01	677		0
	-4.608	3.87		TCGA-A2-A0EQ-01	2426		0					TCGA-BH-A0BJ-01	660	0			1.787	3.751		TCGA-E9-A3QA-01	918		0
	-4.608	3.873		TCGA-5T-A9QA-01	303		0					TCGA-E2-A1IJ-01	865	0			1.791	3.754		TCGA-AC-A3W5-01	504		0
	-4.608	3.908		TCGA-GM-A2DC-01	2535		0					TCGA-A2-A25A-01	3276	0			1.795	3.782		TCGA-A8-A0A6-01	640		0
	-4.608	4.018		TCGA-A8-A07S-01	243		0					TCGA-A2-A0T6-01	575	0			1.799	3.788		TCGA-AO-A0JJ-01	1887		0
	-4.608	4.053		TCGA-A2-A0T2-01	255		1					TCGA-LL-A73Y-01	477	0			1.804	3.79		TCGA-A2-A0CT-01	2289		0
	-4.608	4.082		TCGA-EW-A1P6-01	562		0					TCGA-OL-A6VQ-01	600	0			1.804	3.809		TCGA-AN-A0XL-01	163		0
	-4.608	4.11		TCGA-E2-A1L8-01	2240		0					TCGA-LD-A74U-01	402	0			1.808	3.822		TCGA-LL-A7T0-01	376		0
	-4.608	4.13		TCGA-A2-A0CQ-01	2695		0					TCGA-JL-A3YW-01	360	0			1.808	3.828		TCGA-AO-A129-01	3286		0
	-4.608	4.168		TCGA-AN-A0FK-01	213		0					TCGA-A2-A0YD-01	769	0			1.808	3.833		TCGA-A7-A4SC-01	446		0
	-4.608	4.168		TCGA-A8-A06R-01	547		0					TCGA-GM-A3XG-01	1330	0			1.824	3.839		TCGA-LL-A5YL-01	519		0
	-4.608	4.188		TCGA-E2-A109-01	1417		0					TCGA-AR-A1AK-01	3159	0			1.824	3.845		TCGA-E2-A153-01	707		0
	-4.608	4.19		TCGA-A8-A08T-01	3409		1					TCGA-A2-A4S2-01	643	0			1.832	3.882		TCGA-A7-A6VY-01	266		0
	-4.608	4.237		TCGA-BH-A8FY-01	295		1					TCGA-E9-A1R3-01	78	0			1.848	3.888		TCGA-OL-A66I-01	714		0
	-4.608	4.243		TCGA-AC-A2FM-01	792		1					TCGA-AQ-A0Y5-01	172	1			1.852	3.89		TCGA-E9-A1NF-01	1072		1
	-4.608	4.277		TCGA-BH-A0HI-01	620		0					TCGA-E9-A226-01	1048	1			1.856	3.894		TCGA-C8-A278-01	297		0
	-4.608	4.291		TCGA-B6-A0IM-01	3873		1					TCGA-A2-A0CO-01	3492	1			1.856	3.908		TCGA-C8-A137-01	379		0
	-4.608	4.328		TCGA-E2-A155-01	640		0					TCGA-AC-A2B8-01	677	0			1.856	3.911		TCGA-A2-A0CS-01	2348		1
	-4.608	4.343		TCGA-LQ-A4E4-01	849		0					TCGA-E2-A572-01	1208	0			1.856	3.912		TCGA-EW-A1P7-01	915		0
	-4.608	4.425		TCGA-GM-A3NW-01	3361		0					TCGA-BH-A0B5-01	2136	0			1.856	3.918		TCGA-E2-A1LE-01	879		1
	-4.608	4.491		TCGA-AQ-A1H2-01	475		0					TCGA-BH-A0BD-01	554	0			1.856	3.926		TCGA-A2-A0CO-01	3492		1
	-4.608	4.534		TCGA-E2-A1L7-01	1836		0					TCGA-A7-A4SE-01	644	0			1.868	3.943		TCGA-A7-A26F-01	738		0
	-4.608	4.538		TCGA-E9-A1RD-01	34		0					TCGA-D8-A3Z5-01	1015	0			1.872	3.943		TCGA-AC-A3TN-01	456		0
	-4.608	4.547		TCGA-AC-A3YJ-01	754		0					TCGA-E2-A152-01	2128	0			1.876	3.944		TCGA-C8-A12K-01	0		0
	-4.608	4.563		TCGA-E2-A15L-01	626		0					TCGA-AC-A3W7-01	471	0			1.88	3.945		TCGA-B6-A0WW-01	558		1
	-4.608	4.576		TCGA-BH-A0HA-01	1611		0					TCGA-BH-A0DV-01	2064	0			1.88	3.946		TCGA-AO-A1KT-01	541		0
	-4.608	4.595		TCGA-C8-A3M8-01	394		0					TCGA-AR-A2LR-01	1742	0			1.888	3.959		TCGA-BH-A0DE-01	2372		0
	-4.608	4.614		TCGA-E9-A1NF-01	1072		1					TCGA-A2-A3XY-01	1093	1			1.896	3.962		TCGA-B6-A0IA-01	8391		0
	-4.608	4.646		TCGA-AN-A0FN-01	218		0					TCGA-AC-A8OR-01	40	0			1.9	3.965		TCGA-AO-A0J2-01	997		0
	-4.608	4.68		TCGA-3C-AALI-01	4005		0					TCGA-BH-A0W4-01	759	0			1.9	3.968		TCGA-BH-A8FZ-01	574		0
	-4.608	4.687		TCGA-LL-A740-01	441		0					TCGA-AN-A0XN-01	10	0			1.903	3.968		TCGA-EW-A1IZ-01	554		0
	-4.442	4.69		TCGA-AC-A3QQ-01	734		0					TCGA-A7-A5ZX-01	336	0			1.903	3.98		TCGA-C8-A8HR-01	408		0
	-4.293	4.773		TCGA-E9-A1R7-01	1467		0					TCGA-E2-A1IG-01	2140	0			1.903	3.995		TCGA-E2-A1IG-01	2140		0
	-4.293	4.804		TCGA-BH-A1FG-01	3736		1					TCGA-BH-A0AZ-01	1919	0			1.911	4.002		TCGA-5L-AAT1-01	1471		0
	-4.293	4.82		TCGA-C8-A1HG-01	345		0					TCGA-EW-A2FR-01	1673	0			1.93	4.006		TCGA-BH-A0BA-01	1132		0
	-4.293	4.86		TCGA-AO-A0J7-01	618		0					TCGA-D8-A27I-01	439	0			1.93	4.011		TCGA-LD-A9QF-01	323		0
	-4.293	4.929		TCGA-Z7-A8R6-01	3256		0					TCGA-E2-A1LL-01	1309	0			1.934	4.011		TCGA-D8-A1XW-01	1309		0
	-4.293	5.124		TCGA-BH-A1FM-01	1388		1					TCGA-A1-A0SD-01	437	0			1.934	4.081		TCGA-BH-A18K-01	2763		1
	-4.293	5.182		TCGA-A8-A08G-01	607		0					TCGA-EW-A1PG-01	1051	0			1.938	4.085		TCGA-D8-A1Y1-01	302		1
	-4.293	5.228		TCGA-OL-A66O-01	528		0					TCGA-A7-A0CE-01	1074	0			1.945	4.088		TCGA-AR-A1AI-01	3296		0
	-4.293	5.243		TCGA-E2-A106-01	2541		0					TCGA-BH-A8G0-01	662	0			1.945	4.089		TCGA-D8-A1JG-01	1612		0
	-4.293	5.321		TCGA-E9-A1R5-01	92		0					TCGA-LD-A7W5-01	216	0			1.945	4.096		TCGA-BH-A0BC-01	974		0
	-4.293	5.346		TCGA-AR-A1AS-01	1150		0					TCGA-OL-A5RV-01	1062	0			1.945	4.105		TCGA-C8-A3M8-01	394		0
	-4.293	5.354		TCGA-WT-AB44-01	883		0					TCGA-EW-A1PF-01	439	0			1.945	4.119		TCGA-AO-A12E-01	2142		0
	-4.293	5.418		TCGA-BH-A18H-01	652		0					TCGA-W8-A86G-01	347	0			1.945	4.133		TCGA-A2-A04W-01	3102		0
	-4.293	5.435		TCGA-A8-A07P-01	334		0					TCGA-BH-A201-01	856	0			1.945	4.134		TCGA-XX-A89A-01	488		0
	-4.293	5.458		TCGA-AN-A0XP-01	9		0					TCGA-A2-A0T7-01	631	0			1.949	4.149		TCGA-E2-A2P5-01	821		1
	-4.293	5.477		TCGA-A2-A0CS-01	2348		1					TCGA-BH-A0EA-01	991	1			1.949	4.155		TCGA-A2-A0CK-01	4159		0
	-4.293	5.652		TCGA-A8-A09B-01	365		0					TCGA-4H-AAAK-01	348	0			1.953	4.186		TCGA-A8-A09W-01	30		0
	-4.293	5.661		TCGA-AR-A24N-01	3035		0					TCGA-B6-A0WY-01	3461	1			1.96	4.201		TCGA-AO-A03L-01	2442		0
	-4.293	5.683		TCGA-E2-A15K-01	275		0					TCGA-HN-A2OB-01	1900	1			1.964	4.231		TCGA-UU-A93S-01	116		1
	-4.293	5.721		TCGA-B6-A0IB-01	3941		1					TCGA-A2-A1FZ-01	683	0			1.967	4.274		TCGA-AN-A04C-01	54		0
	-4.293	5.753		TCGA-E2-A1LE-01	879		1					TCGA-E9-A1NG-01	786	1			1.967	4.28		TCGA-AR-A5QP-01	1185		0
	-4.293	5.828		TCGA-B6-A40C-01	2164		0					TCGA-AO-A1KT-01	541	0			1.971	4.294		TCGA-AN-A0AJ-01	303		0
	-4.293	5.925		TCGA-AR-A24V-01	3203		0					TCGA-XX-A899-01	467	0			1.971	4.341		TCGA-A7-A4SA-01	454		0
	-4.293	5.929		TCGA-D8-A1XA-01	839		0					TCGA-A1-A0SJ-01	416	0			1.975	4.346		TCGA-BH-A18U-01	1563		1
	-4.293	6.009		TCGA-E2-A1IG-01	2140		0					TCGA-BH-A0BO-01	2197	0			1.979	4.349		TCGA-B6-A0RP-01	3126		1
	-4.293	6.012		TCGA-D8-A1XD-01	522		0					TCGA-AC-A6IX-01	373	0			1.982	4.36		TCGA-A2-A0EX-01	752		0
	-4.035	6.15		TCGA-AN-A03Y-01	10		0					TCGA-AR-A0TP-01	4275	0			1.993	4.404		TCGA-3C-AALI-01	4005		0
	-4.035	6.251		TCGA-AR-A0U3-01	4080		0					TCGA-AR-A2LH-01	616	1			1.993	4.431		TCGA-BH-A6R9-01	160		0
	-4.035	6.374		TCGA-AR-A2LE-01	5062		0					TCGA-D8-A1XB-01	552	0			1.997	4.444		TCGA-A8-A08B-01	1156		0
	-4.035	6.418		TCGA-OL-A5D8-01	973		0					TCGA-3C-AALI-01	4005	0			1.997	4.468		TCGA-E2-A573-01	1062		0
	-4.035	6.46		TCGA-BH-A0BF-01	1324		1					TCGA-A7-A6VV-01	313	0			2	4.498		TCGA-BH-A0HN-01	516		0
	-4.035	6.619		TCGA-AN-A03X-01	10		0					TCGA-AR-A1AU-01	2868	0			2	4.579		TCGA-E9-A247-01	1186		0
	-4.035	7.352		TCGA-D8-A73W-01	385		1					TCGA-E2-A1IO-01	1855	0			2	4.951		TCGA-BH-A0BQ-01	2255		0
	-4.035	7.911		TCGA-A2-A04X-01	1686		0					TCGA-D8-A27F-01	488	0			2	5.007		TCGA-GM-A3XG-01	1330		0
	-4.035	8.944		TCGA-BH-A0DZ-01	495		0					TCGA-AR-A2LN-01	1161	0			2.008	5.17		TCGA-B6-A0IK-01	571		1
	-4.035			TCGA-A8-A09R-01	273		0					TCGA-A7-A5ZV-01	368	0			2.008			TCGA-E9-A3Q9-01	1001		0
	-4.035			TCGA-A1-A0SM-01	242		0					TCGA-AC-A3HN-01	496	0			2.008			TCGA-C8-A12V-01	385		0
	-4.035			TCGA-C8-A12W-01	385		0					TCGA-EW-A1P0-01	1251	0			2.008			TCGA-D8-A147-01	584		0
	-4.035			TCGA-JL-A3YW-01	360		0					TCGA-AC-A2QJ-01	446	1						TCGA-OL-A6VQ-01	600	0
				TCGA-A2-A0SU-01	1662	0						TCGA-BH-A1EX-01	1508	1						TCGA-BH-AB28-01	287	0
				TCGA-BH-A0BR-01	2330	0						TCGA-EW-A1P5-01	703	0						TCGA-A2-A0YF-01	1535	0
				TCGA-A2-A0EU-01	1043	0						TCGA-BH-A42U-01	3364	0						TCGA-AR-A24U-01	3128	0
				TCGA-AR-A1AM-01	2991	0						TCGA-LL-A441-01	996	0						TCGA-AQ-A04J-01	819	0
				TCGA-E2-A1IF-01	1138	0						TCGA-A2-A3XW-01	1712	0						TCGA-EW-A1PG-01	1051	0
				TCGA-A2-A0CZ-01	1616	0						TCGA-A1-A0SB-01	259	0						TCGA-A7-A5ZW-01	326	0
				TCGA-LD-A74U-01	402	0						TCGA-A7-A426-01	364	0						TCGA-EW-A1OW-01	694	0
				TCGA-BH-A28Q-01	1119	0						TCGA-D8-A1XM-01	538	0						TCGA-EW-A1J5-01	477	0
				TCGA-E2-A14V-01	1042	0						TCGA-AR-A2LQ-01	1233	0						TCGA-D8-A1JN-01	620	0
				TCGA-E9-A1QZ-01	755	0						TCGA-A2-A0CL-01	3015	0						TCGA-E9-A24A-01	747	0
				TCGA-C8-A135-01	393	0						TCGA-AC-A6IV-01	568	0						TCGA-A8-A07U-01	760	0
				TCGA-E2-A1IU-01	337	0						TCGA-A2-A04W-01	3102	0						TCGA-A8-A08T-01	3409	1
				TCGA-C8-A12Q-01	385	1						TCGA-AC-A3W6-01	602	0						TCGA-E9-A1RH-01	1417	0
				TCGA-EW-A1J2-01	403	0						TCGA-AC-A23G-01	2248	0						TCGA-AN-A0FS-01	210	0
				TCGA-D8-A1JH-01	426	0						TCGA-BH-A1FH-01	1034	1						TCGA-AR-A2LE-01	5062	0
				TCGA-AR-A252-01	2838	0						TCGA-A2-A3KC-01	1102	0						TCGA-AC-A4ZE-01	890	0
				TCGA-BH-A8G0-01	662	0						TCGA-S3-AA11-01	421	0						TCGA-B6-A0I9-01	362	1
				TCGA-BH-A1F2-01	959	1						TCGA-BH-A0BL-01	2278	0						TCGA-4H-AAAK-01	348	0
				TCGA-BH-A1F0-01	785	1						TCGA-AC-A2FK-01	2650	0						TCGA-AR-A1AU-01	2868	0
				TCGA-A8-A094-01	0	0						TCGA-E9-A229-01	1148	0						TCGA-E2-A3DX-01	1325	0
				TCGA-A7-A4SD-01	441	0						TCGA-AO-A03U-01	1793	1						TCGA-A1-A0SG-01	434	0
				TCGA-LL-A73Y-01	477	0						TCGA-XX-A89A-01	488	0						TCGA-A1-A0SN-01	1196	0
				TCGA-BH-A0DK-01	423	0						TCGA-D8-A1XD-01	522	0						TCGA-BH-A0B8-01	1569	0
				TCGA-A1-A0SE-01	1321	0						TCGA-LL-A440-01	759	0						TCGA-AO-A03M-01	1866	0
				TCGA-D8-A27L-01	499	0						TCGA-B6-A400-01	215	0						TCGA-D8-A1XB-01	552	0
				TCGA-BH-A0BJ-01	660	0						TCGA-C8-A273-01	513	0						TCGA-LL-A73Y-01	477	0
				TCGA-A7-A3IY-01	345	0						TCGA-BH-A28O-01	1120	0						TCGA-BH-A28Q-01	1119	0
				TCGA-A8-A07E-01	608	0						TCGA-AN-A0FY-01	10	0						TCGA-AR-A0TS-01	2558	0
				TCGA-D8-A1JK-01	612	0						TCGA-C8-A134-01	383	0						TCGA-BH-A1EU-01	1286	1
				TCGA-A8-A0A6-01	640	0						TCGA-LL-A740-01	441	0						TCGA-A2-A4S3-01	666	0
				TCGA-BH-A0H3-01	1928	0						TCGA-AQ-A7U7-01	584	1						TCGA-EW-A1IY-01	258	0
				TCGA-AR-A1AQ-01	3021	0						TCGA-AC-A3YI-01	707	0						TCGA-AN-A0AM-01	5	0
				TCGA-E2-A15E-01	630	0						TCGA-D8-A147-01	584	0						TCGA-BH-A1FU-01	1688	1
				TCGA-A8-A0A4-01	396	0						TCGA-E9-A1NA-01	1112	0						TCGA-A2-A0ET-01	1066	0
				TCGA-E2-A1B1-01	2653	0						TCGA-D8-A1XT-01	506	0						TCGA-S3-A6ZF-01	572	0
				TCGA-E9-A1NG-01	786	1						TCGA-E2-A14P-01	1246	0						TCGA-E2-A14S-01	1009	0
				TCGA-B6-A0RS-01	3063	1						TCGA-AO-A0J5-01	792	1						TCGA-C8-A27B-01	439	0
				TCGA-D8-A27V-01	381	0						TCGA-D8-A4Z1-01	659	0						TCGA-AR-A5QN-01	1013	0
				TCGA-BH-A28O-01	1120	0						TCGA-OL-A97C-01	271	0						TCGA-BH-A1ES-01	3462	1
				TCGA-B6-A0IH-01	3418	1						TCGA-BH-A0DI-01	912	0						TCGA-D8-A1XM-01	538	0
				TCGA-E9-A248-01	59	0						TCGA-A7-A6VX-01	317	0						TCGA-EW-A6SC-01	952	0
				TCGA-C8-A134-01	383	0						TCGA-D8-A27H-01	397	0						TCGA-B6-A0IG-01	4456	1
				TCGA-LL-A5YL-01	519	0						TCGA-BH-A0HL-01	72	0						TCGA-D8-A1JI-01	577	0
				TCGA-A7-A5ZW-01	326	0						TCGA-EW-A1IX-01	1208	0						TCGA-AQ-A1H3-01	989	0
				TCGA-E9-A1RB-01	976	1						TCGA-A2-A4RY-01	648	0						TCGA-EW-A1PD-01	424	0
				TCGA-W8-A86G-01	347	0						TCGA-BH-A6R9-01	160	0						TCGA-D8-A1X8-01	783	0
				TCGA-D8-A27P-01	49	0						TCGA-BH-A0BW-01	2371	0						TCGA-C8-A1HE-01	375	0
				TCGA-AR-A2LR-01	1742	0						TCGA-B6-A0I6-01	991	1						TCGA-BH-A0H3-01	1928	0
				TCGA-A2-A1G0-01	616	0						TCGA-A2-A4RX-01	742	0						TCGA-GI-A2C9-01	3342	0
				TCGA-AR-A2LQ-01	1233	0						TCGA-A2-A4S1-01	820	0						TCGA-BH-A0C7-01	2767	0
				TCGA-AR-A2LM-01	1935	0														TCGA-EW-A1J2-01	403	0
				TCGA-AR-A1AK-01	3159	0														TCGA-BH-A0E1-01	477	0
				TCGA-AC-A3YI-01	707	0														TCGA-AR-A255-01	2161	0
				TCGA-A1-A0SP-01	584	0														TCGA-3C-AALJ-01	1474	0
				TCGA-BH-A0HK-01	178	0														TCGA-AR-A254-01	2605	0
				TCGA-C8-A1HL-01	317	0														TCGA-BH-A0H9-01	1247	0
				TCGA-A7-A13H-01	899	0														TCGA-PL-A8LX-01	5	0
				TCGA-A2-A0T7-01	631	0														TCGA-A8-A07S-01	243	0
				TCGA-A1-A0SO-01	852	0														TCGA-A2-A0T0-01	533	0
				TCGA-OL-A5RX-01	878	0														TCGA-AR-A24X-01	3004	0
				TCGA-AR-A5QN-01	1013	0														TCGA-A8-A081-01	0	0
				TCGA-BH-A0DO-01	1644	0														TCGA-E2-A15G-01	554	0
				TCGA-S3-A6ZF-01	572	0														TCGA-AC-A23C-01	585	0
				TCGA-LL-A440-01	759	0														TCGA-AR-A2LM-01	1935	0
				TCGA-AQ-A1H3-01	989	0														TCGA-D8-A27L-01	499	0
				TCGA-MS-A51U-01	681	0														TCGA-EW-A1IW-01	371	0
				TCGA-BH-A0EA-01	991	1														TCGA-D8-A1XC-01	377	1
				TCGA-AO-A0JE-01	2335	0														TCGA-C8-A26W-01	381	0
				TCGA-UL-AAZ6-01	518	0														TCGA-A2-A0CL-01	3015	0
				TCGA-AO-A0JD-01	2190	0														TCGA-EW-A1P6-01	562	0
				TCGA-AN-A04C-01	54	0														TCGA-A8-A06X-01	943	1
				TCGA-BH-A0BL-01	2278	0														TCGA-A8-A06Q-01	31	0
				TCGA-C8-A12O-01	385	0														TCGA-B6-A0WV-01	2417	1
				TCGA-A2-A0EV-01	968	0														TCGA-A2-A1G0-01	616	0
				TCGA-AC-A2FG-01	1853	0														TCGA-A8-A099-01	304	0
				TCGA-EW-A1PG-01	1051	0														TCGA-A7-A3J1-01	343	0
				TCGA-BH-A0B3-01	1203	0														TCGA-A2-A0YE-01	554	0
				TCGA-EW-A2FV-01	788	0														TCGA-AC-A6NO-01	51	0
				TCGA-E2-A1LL-01	1309	0														TCGA-E2-A1L7-01	1836	0
				TCGA-A2-A0YJ-01	566	0														TCGA-E9-A1R6-01	339	0
				TCGA-BH-A0BM-01	1876	0														TCGA-AO-A03P-01	2911	1
				TCGA-A2-A0EW-01	1884	1														TCGA-D8-A1X7-01	509	0
				TCGA-BH-A1FH-01	1034	1														TCGA-E2-A10B-01	1141	0
				TCGA-AC-A2B8-01	677	0														TCGA-E2-A1IE-01	2362	0
				TCGA-C8-A12K-01	0	0														TCGA-A2-A0D2-01	1027	0
				TCGA-A7-A13D-01	965	0														TCGA-E2-A1AZ-01	2329	0
				TCGA-A8-A07G-01	577	0														TCGA-E2-A106-01	2541	0
				TCGA-AR-A1AY-01	1026	0														TCGA-E9-A1R3-01	78	0
				TCGA-AR-A2LO-01	1198	0														TCGA-A8-A09K-01	912	0
				TCGA-E2-A158-01	450	0														TCGA-A8-A08C-01	881	0
				TCGA-B6-A0RQ-01	4267	1														TCGA-A2-A0YM-01	965	0
				TCGA-E9-A3QA-01	918	0														TCGA-D8-A1X9-01	727	0
				TCGA-D8-A1XQ-01	499	0														TCGA-A8-A07F-01	577	0
				TCGA-D8-A1XO-01	1682	0														TCGA-5T-A9QA-01	303	0
				TCGA-UU-A93S-01	116	1														TCGA-A7-A4SF-01	545	0
				TCGA-AR-A24M-01	3660	0														TCGA-AO-A1KS-01	350	0
				TCGA-C8-A12L-01	363	0														TCGA-A8-A075-01	518	0
				TCGA-E9-A1NE-01	1088	0														TCGA-E2-A15S-01	428	0
				TCGA-AR-A24W-01	1550	0														TCGA-AR-A0U2-01	2551	1
				TCGA-AR-A5QP-01	1185	0														TCGA-AO-A12H-01	1234	0
				TCGA-AN-A04D-01	52	0														TCGA-D8-A1XD-01	522	0
				TCGA-OL-A6VO-01	858	0														TCGA-E9-A1N4-01	1000	0
				TCGA-OL-A5RW-01	1106	0														TCGA-BH-A0WA-01	701	0
				TCGA-AR-A1AU-01	2868	0														TCGA-AN-A0FF-01	172	0
				TCGA-AO-A0J2-01	997	0														TCGA-AR-A24P-01	84	0
				TCGA-BH-A1FU-01	1688	1														TCGA-A8-A09T-01	579	0
				TCGA-AC-A23G-01	2248	0														TCGA-AO-A124-01	3506	0
				TCGA-D8-A1JB-01	1688	0														TCGA-C8-A12Q-01	385	1
				TCGA-C8-A8HQ-01	380	0														TCGA-D8-A1JH-01	426	0
				TCGA-A2-A0SX-01	1534	0														TCGA-AN-A0FZ-01	10	0
				TCGA-AO-A0JL-01	1683	0														TCGA-AR-A24L-01	2866	1
				TCGA-AC-A62X-01	417	0														TCGA-A2-A04T-01	2246	0
				TCGA-D8-A27K-01	1461	0														TCGA-A8-A08I-01	365	0
				TCGA-AO-A12E-01	2142	0														TCGA-D8-A1X5-01	565	0
				TCGA-A2-A1G6-01	501	0														TCGA-AC-A8OR-01	40	0
				TCGA-Z7-A8R5-01	3287	0														TCGA-AO-A0JD-01	2190	0
				TCGA-A2-A4RY-01	648	0														TCGA-AN-A0AS-01	10	0
				TCGA-A2-A0YL-01	1474	0														TCGA-D8-A1JJ-01	611	0
				TCGA-A7-A0DA-01	1085	0														TCGA-BH-A1ET-01	2520	1
				TCGA-BH-A0BQ-01	2255	0														TCGA-C8-A273-01	513	0
				TCGA-AR-A1AO-01	2618	0														TCGA-D8-A1XO-01	1682	0
				TCGA-A2-A3XZ-01	1532	0														TCGA-A8-A09C-01	31	0
				TCGA-AR-A24Q-01	3172	0														TCGA-BH-A1F5-01	2712	1
				TCGA-D8-A1XW-01	1309	0														TCGA-E2-A10A-01	1229	0
				TCGA-E9-A249-01	217	0														TCGA-BH-A0E2-01	435	0
				TCGA-A2-A25A-01	3276	0														TCGA-C8-A26Z-01	470	0
				TCGA-A2-A04W-01	3102	0														TCGA-E2-A14U-01	1318	0
				TCGA-A1-A0SI-01	635	0														TCGA-C8-A133-01	0	0
				TCGA-A2-A0CM-01	754	1														TCGA-E2-A15R-01	1732	0
				TCGA-A2-A3XS-01	1032	1														TCGA-A8-A06N-01	0	0
				TCGA-A8-A084-01	458	0														TCGA-D8-A27K-01	1461	0
				TCGA-B6-A0WT-01	5739	0														TCGA-E2-A105-01	1308	0
				TCGA-EW-A3U0-01	532	0														TCGA-D8-A27P-01	49	0
				TCGA-AR-A24O-01	3607	0														TCGA-A8-A08A-01	30	0
				TCGA-AR-A1AL-01	2971	0														TCGA-AC-A2FF-01	2759	0
				TCGA-B6-A401-01	2596	0														TCGA-E2-A1B0-01	1631	0
				TCGA-AR-A0TY-01	1699	1														TCGA-BH-A0EI-01	1926	0
				TCGA-E2-A1B0-01	1631	0														TCGA-BH-A18F-01	1001	0
				TCGA-LL-A6FR-01	489	0														TCGA-BH-A18P-01	921	1
				TCGA-HN-A2NL-01	79	0														TCGA-BH-A0BW-01	2371	0
				TCGA-BH-A0HF-01	727	0														TCGA-LD-A7W6-01	404	0
				TCGA-LD-A9QF-01	323	0														TCGA-E9-A1N5-01	1120	0
				TCGA-E2-A150-01	1935	0														TCGA-A8-A09E-01	1492	0
				TCGA-AC-A2FB-01	1234	0														TCGA-A7-A2KD-01	679	0
				TCGA-AN-A0XU-01	10	0														TCGA-AR-A24S-01	2976	0
				TCGA-E2-A1II-01	1025	0														TCGA-A8-A08R-01	30	0
				TCGA-B6-A402-01	2281	0														TCGA-BH-A0H6-01	747	0
				TCGA-A7-A6VV-01	313	0														TCGA-C8-A275-01	1	0
				TCGA-E2-A14R-01	1174	0														TCGA-E2-A1IU-01	337	0
				TCGA-AO-A12A-01	3112	0														TCGA-A8-A082-01	549	0
				TCGA-B6-A0IK-01	571	1														TCGA-B6-A0X1-01	7455	1
				TCGA-AN-A0XO-01	375	0														TCGA-BH-A1F6-01	2965	1
				TCGA-D8-A4Z1-01	659	0														TCGA-B6-A0RO-01	4929	0
				TCGA-C8-A131-01	411	0														TCGA-AN-A0G0-01	16	0
				TCGA-E9-A1N8-01	1039	0														TCGA-AC-A2B8-01	677	0
				TCGA-AR-A2LH-01	616	1														TCGA-D8-A1XT-01	506	0
				TCGA-BH-A0B9-01	1572	0														TCGA-BH-A1FB-01	3669	1
				TCGA-OL-A66N-01	792	0														TCGA-AC-A2BM-01	3022	0
				TCGA-EW-A1PH-01	607	0														TCGA-E2-A14T-01	2311	0
				TCGA-BH-A0BG-01	1871	0														TCGA-BH-A1FL-01	1673	1
				TCGA-A2-A04Q-01	2385	0														TCGA-E2-A10E-01	865	0
				TCGA-E2-A159-01	762	0														TCGA-A2-A0CM-01	754	1
				TCGA-EW-A1PB-01	608	0														TCGA-OL-A66H-01		0
				TCGA-AN-A0AR-01	10	0														TCGA-D8-A27M-01	410	0
				TCGA-B6-A0I6-01	991	1														TCGA-A7-A0DA-01	1085	0
				TCGA-AR-A1AT-01	1272	1														TCGA-OL-A6VO-01	858	0
				TCGA-GM-A2DN-01	3091	0														TCGA-AO-A0J5-01	792	1
				TCGA-AR-A1AJ-01	3072	0														TCGA-A7-A26G-01	722	0
				TCGA-EW-A1P7-01	915	0														TCGA-GM-A2DM-01	3226	0
				TCGA-E2-A1LI-01	3121	0														TCGA-AR-A1AL-01	2971	0
				TCGA-EW-A1OW-01	694	0														TCGA-A2-A25B-01	1291	0
				TCGA-BH-A202-01	795	0														TCGA-D8-A1XJ-01	664	0
				TCGA-A2-A0CY-01	1673	0														TCGA-BH-A1F0-01	785	1
				TCGA-PL-A8LY-01	8	0														TCGA-E2-A15F-01	658	0
				TCGA-AO-A129-01	3286	0														TCGA-A2-A1G1-01	584	0
				TCGA-A2-A04U-01	2654	0														TCGA-AR-A24R-01	3430	0
				TCGA-BH-A18V-01	1556	1														TCGA-A2-A0T3-01	1516	0
				TCGA-A7-A26F-01	738	0														TCGA-A2-A3KD-01	1206	0
				TCGA-OL-A5RY-01	752	0														TCGA-AR-A24Z-01	3001	0
				TCGA-C8-A12P-01	358	0														TCGA-E2-A15H-01	393	0
				TCGA-A8-A07C-01	1034	0														TCGA-BH-A18R-01	1142	1
				TCGA-A2-A0YK-01	588	0														TCGA-AR-A0TQ-01	2991	0
				TCGA-AO-A0J4-01	1587	0														TCGA-BH-A1EX-01	1508	1
				TCGA-A7-A6VW-01	285	0														TCGA-A2-A25C-01	523	0
				TCGA-BH-A1FB-01	3669	1														TCGA-AR-A1AY-01	1026	0
				TCGA-E9-A1NC-01	1203	0														TCGA-E2-A15T-01	1563	0
				TCGA-C8-A1HJ-01	5	0														TCGA-A2-A0YG-01	666	0
				TCGA-B6-A0X5-01	2097	1														TCGA-BH-A18T-01	224	1
				TCGA-GI-A2C9-01	3342	0														TCGA-D8-A27F-01	488	0
				TCGA-B6-A1KF-01	3088	0														TCGA-AN-A0AK-01	224	0
				TCGA-A2-A3XX-01	1439	1														TCGA-A2-A0EM-01	3094	0
				TCGA-BH-A8FZ-01	574	0														TCGA-EW-A1IX-01	1208	0
				TCGA-A8-A08R-01	30	0														TCGA-B6-A0RV-01	5156	0
				TCGA-BH-A18T-01	224	1														TCGA-E2-A154-01	591	0
				TCGA-D8-A147-01	584	0														TCGA-E9-A1N9-01	1101	0
				TCGA-C8-A12V-01	385	0														TCGA-D8-A27G-01	409	0
				TCGA-A2-A0ST-01	3017	0														TCGA-A2-A1G4-01	595	0
				TCGA-A2-A0CV-01	3011	0														TCGA-BH-A0BS-01	2612	0
				TCGA-E2-A1LK-01	266	1														TCGA-A8-A09I-01	1371	0
				TCGA-D8-A27H-01	397	0														TCGA-AR-A0TY-01	1699	1
				TCGA-BH-A18Q-01	1692	1														TCGA-BH-A0W3-01	728	0
				TCGA-E2-A1LG-01	1523	0														TCGA-AR-A2LK-01	1649	1
				TCGA-C8-A26Y-01	394	0														TCGA-EW-A1OX-01	911	0
				TCGA-B6-A0IQ-01	4285	0														TCGA-BH-A1FR-01	1642	1
				TCGA-A7-A13E-01	614	1														TCGA-E2-A1L6-01	1648	0
				TCGA-E9-A22G-01	1239	0														TCGA-E9-A229-01	1148	0
				TCGA-AC-A2FK-01	2650	0														TCGA-E9-A1RE-01	1419	0
				TCGA-D8-A1JL-01	611	0														TCGA-E9-A244-01	21	0
				TCGA-BH-A0AV-01	1820	0														TCGA-AR-A2LR-01	1742	0
				TCGA-BH-A1EO-01	2798	1														TCGA-D8-A1J9-01	532	0
				TCGA-A7-A6VY-01	266	0														TCGA-AR-A0TT-01	3316	0
				TCGA-AN-A0FJ-01	242	0														TCGA-EW-A6SA-01	510	0
				TCGA-AO-A0J6-01	1140	0														TCGA-AR-A0U3-01	4080	0
				TCGA-AN-A0AT-01	10	0														TCGA-AC-A2BK-01	2222	0
				TCGA-D8-A143-01	431	0														TCGA-A2-A1FZ-01	683	0
				TCGA-AR-A24U-01	3128	0														TCGA-D8-A27E-01	530	0
				TCGA-BH-A0EE-01	943	0														TCGA-BH-A0W4-01	759	0
				TCGA-B6-A3ZX-01	1152	1														TCGA-BH-A0E7-01	1363	0
				TCGA-A8-A07R-01	273	0														TCGA-D8-A1XS-01	496	0
				TCGA-AO-A12F-01	1842	0														TCGA-AQ-A04H-01	754	0
				TCGA-A2-A1G1-01	584	0														TCGA-A2-A4S0-01	706	0
				TCGA-BH-A0WA-01	701	0														TCGA-BH-A18V-01	1556	1
				TCGA-AQ-A04J-01	819	0														TCGA-B6-A0RM-01	2373	1
				TCGA-BH-A18G-01	149	0														TCGA-E9-A226-01	1048	1
				TCGA-AR-A0TP-01	4275	0														TCGA-BH-A0HO-01	76	0
				TCGA-A2-A04P-01	548	1														TCGA-AN-A041-01	7	0
				TCGA-BH-A1EN-01	2127	1														TCGA-E2-A15L-01	626	0
				TCGA-B6-A0RU-01	8605	0														TCGA-E2-A15A-01	710	0
				TCGA-LL-A5YP-01	450	0														TCGA-C8-A27A-01	747	0
				TCGA-AR-A1AH-01	3807	0														TCGA-D8-A1JF-01	366	0
				TCGA-E2-A1LS-01	1604	0														TCGA-A8-A08G-01	607	0
				TCGA-A1-A0SB-01	259	0														TCGA-AR-A1AV-01	1864	0
				TCGA-AR-A0U0-01	1988	0														TCGA-A7-A0CE-01	1074	0
				TCGA-B6-A0I2-01	4361	0														TCGA-AC-A2FM-01	792	1
				TCGA-BH-A5IZ-01	567	0														TCGA-AO-A0JI-01	1528	0
				TCGA-D8-A27M-01	410	0														TCGA-AR-A256-01	2854	1
				TCGA-AN-A0FL-01	231	0														TCGA-A8-A09V-01	457	0
				TCGA-A2-A0T0-01	533	0														TCGA-E9-A245-01	26	0
				TCGA-D8-A27F-01	488	0														TCGA-B6-A0IC-01	1542	1
				TCGA-A2-A0D2-01	1027	0														TCGA-AR-A24H-01	4894	0
				TCGA-AC-A2BK-01	2222	0														TCGA-B6-A0IM-01	3873	1
				TCGA-E2-A14N-01	1434	0														TCGA-D8-A1XZ-01	466	0
				TCGA-S3-AA15-01	525	0														TCGA-A2-A0EY-01	1925	0
				TCGA-AR-A0U4-01	3261	0														TCGA-AR-A0TR-01	160	1
				TCGA-AN-A0FX-01	10	0														TCGA-AR-A2LL-01	2012	0
				TCGA-D8-A13Z-01	635	0														TCGA-E2-A156-01	726	0
				TCGA-BH-A0BW-01	2371	0														TCGA-LL-A442-01	889	0
				TCGA-D8-A142-01	425	0														TCGA-E9-A1R7-01	1467	0
				TCGA-A2-A4RX-01	742	0														TCGA-B6-A0WT-01	5739	0
				TCGA-BH-A1F6-01	2965	1														TCGA-BH-A18N-01	1148	1
				TCGA-LL-A441-01	996	0														TCGA-A8-A08O-01	943	0
				TCGA-AO-A1KO-01	622	0														TCGA-A1-A0SO-01	852	0
				TCGA-E9-A1ND-01	1266	0														TCGA-A7-A3J0-01	313	0
				TCGA-E2-A573-01	1062	0														TCGA-A2-A0ER-01	2263	0
				TCGA-BH-A0DL-01	2381	0														TCGA-A2-A259-01	1596	0
				TCGA-AN-A0AL-01	227	0														TCGA-D8-A1XQ-01	499	0
				TCGA-AR-A1AI-01	3296	0														TCGA-A7-A3IZ-01	322	0
				TCGA-B6-A0WX-01	639	1														TCGA-S3-AA12-01	574	0
				TCGA-BH-A1EX-01	1508	1														TCGA-OL-A6VR-01	1220	0
				TCGA-S3-AA0Z-01	629	0														TCGA-E9-A1N3-01	1059	0
				TCGA-B6-A0RE-01	7777	0														TCGA-D8-A1XK-01	441	0
				TCGA-A2-A0YE-01	554	0														TCGA-BH-A204-01	2534	1
				TCGA-EW-A1P4-01	907	0														TCGA-EW-A2FW-01	672	0
				TCGA-C8-A27B-01	439	0														TCGA-BH-A0HW-01	1561	0
				TCGA-AO-A124-01	3506	0														TCGA-EW-A1J1-01	575	0
				TCGA-AO-A03U-01	1793	1														TCGA-AN-A0AT-01	10	0
				TCGA-A7-A26G-01	722	0														TCGA-A8-A07C-01	1034	0
				TCGA-E2-A14Y-01	2109	0														TCGA-E9-A228-01	1285	0
				TCGA-AN-A0G0-01	16	0														TCGA-A8-A091-01	1004	0
				TCGA-A7-A0CE-01	1074	0														TCGA-A2-A0YJ-01	566	0
				TCGA-D8-A1JM-01	590	0														TCGA-D8-A1XF-01	463	0
				TCGA-PL-A8LZ-01	302	0														TCGA-A1-A0SK-01	967	1
				TCGA-E9-A243-01	612	0

## Sheet: ED Fig 7 c
	Extended Data Fig 7c
	PAAD
	SLC6A14								SLC12A4				Time (Days)	SLC12A4 High	SLC12A4 Low		SLC25A15				Time (Days)	SLC25A15 High	SLC25A15 Low
	Low	High			Time (Days)	SLC6A14 High	SLC6A14 Low		Low	High		TCGA-HZ-7289-01	661		1		Low	High		TCGA-3A-A9IN-01	2084		0
	-9.966	4.648		TCGA-3A-A9IN-01	2084		0		1.669	5.056		TCGA-3A-A9IS-01	998		0		-0.8599	2.254		TCGA-2L-AAQM-01	1383		0
	-9.966	4.666		TCGA-3A-A9IJ-01	1854		0		2.078	5.068		TCGA-3A-A9IR-01	1542		0		-0.8339	2.263		TCGA-HV-A5A3-01	128		1
	-9.966	4.672		TCGA-3A-A9IS-01	998		0		2.379	5.077		TCGA-FB-AAPP-01	485		1		-0.1993	2.266		TCGA-HV-A7OL-01	252		0
	-9.966	4.745		TCGA-2J-AABP-01	463		0		2.428	5.09		TCGA-US-A776-01	1216		0		0.044	2.269		TCGA-Q3-A5QY-01	416		0
	-9.966	4.779		TCGA-F2-6880-01	295		0		2.47	5.121		TCGA-2J-AABV-01	652		1		0.058	2.272		TCGA-2J-AABV-01	652		1
	-9.966	4.78		TCGA-3A-A9IV-01	1103		0		2.524	5.122		TCGA-HV-A7OP-01	978		0		0.1257	2.275		TCGA-FB-AAQ3-01	31		1
	-6.506	4.788		TCGA-2L-AAQM-01	1383		0		2.531	5.13		TCGA-F2-6880-01	295		0		0.1776	2.278		TCGA-3A-A9IJ-01	1854		0
	-3.308	4.799		TCGA-3A-A9IL-01	2741		0		2.671	5.135		TCGA-3A-A9IO-01	1942		0		0.24	2.281		TCGA-2L-AAQL-01	292		1
	-2.932	4.807		TCGA-3A-A9IO-01	1942		0		2.712	5.135		TCGA-IB-7649-01	467		1		0.2998	2.296		TCGA-OE-A75W-01	267		1
	-2.826	4.836		TCGA-3A-A9IR-01	1542		0		2.93	5.14		TCGA-IB-8126-01	462		0		0.3231	2.299		TCGA-3A-A9IS-01	998		0
	-2.315	4.85		TCGA-XN-A8T3-01	951		0		3.082	5.141		TCGA-LB-A9Q5-01	313		1		0.3573	2.308		TCGA-HV-A7OP-01	978		0
	-1.994	4.854		TCGA-FB-AAPP-01	485		1		3.471	5.142		TCGA-IB-AAUM-01	8		0		0.4552	2.325		TCGA-FB-AAQ1-01	123		1
	-1.595	4.857		TCGA-2J-AABV-01	652		1		3.532	5.146		TCGA-HZ-A49H-01	491		0		0.5568	2.328		TCGA-Q3-AA2A-01	95		0
	-1.283	4.859		TCGA-IB-AAUT-01	287		0		3.585	5.148		TCGA-HZ-8003-01	596		1		0.5666	2.342		TCGA-3A-A9IO-01	1942		0
	-1.117	4.886		TCGA-IB-AAUV-01	404		0		3.703	5.15		TCGA-3A-A9IL-01	2741		0		0.5955	2.359		TCGA-IB-7649-01	467		1
	-0.7834	4.947		TCGA-US-A776-01	1216		0		3.768	5.15		TCGA-HZ-8317-01	378		1		0.6239	2.393		TCGA-IB-AAUO-01	239		1
	-0.4521	4.993		TCGA-US-A77J-01	568		1		3.792	5.157		TCGA-FB-AAQ3-01	31		1		0.6969	2.401		TCGA-FB-A5VM-01	498		1
	-0.2328	5.019		TCGA-HZ-8002-01	366		1		3.793	5.16		TCGA-F2-A44H-01	586		0		0.8082	2.441		TCGA-F2-A44G-01	233		1
	-0.1031	5.096		TCGA-2J-AAB9-01	627		1		3.815	5.2		TCGA-FB-AAPU-01	381		1		0.8246	2.454		TCGA-HZ-8001-01	706		0
	0.0014	5.134		TCGA-IB-7654-01	476		1		3.816	5.203		TCGA-3A-A9IJ-01	1854		0		0.8568	2.473		TCGA-F2-A44H-01	586		0
	0.1124	5.205		TCGA-HZ-A77O-01	160		1		3.828	5.207		TCGA-FB-AAQ6-01	244		1		0.8647	2.48		TCGA-FB-AAQ0-01	473		1
	0.24	5.31		TCGA-FB-AAQ1-01	123		1		3.848	5.227		TCGA-HZ-8637-01	517		1		0.9268	2.491		TCGA-RL-AAAS-01	9		0
	0.434	5.369		TCGA-IB-8126-01	462		0		3.865	5.227		TCGA-HZ-8519-01	454		0		0.9343	2.493		TCGA-3A-A9I9-01	634		1
	0.4657	5.381		TCGA-3A-A9J0-01	743		0		3.876	5.234		TCGA-FB-AAPQ-01	1130		1		0.9642	2.526		TCGA-IB-AAUR-01	338		0
	0.4761	5.384		TCGA-HZ-7289-01	661		1		3.877	5.244		TCGA-FB-AAQ1-01	123		1		1.001	2.556		TCGA-XD-AAUH-01	395		0
	0.4865	5.405		TCGA-Q3-A5QY-01	416		0		3.944	5.248		TCGA-HZ-7918-01	969		0		1.001	2.563		TCGA-FB-A4P5-01	179		1
	0.7493	5.431		TCGA-IB-7897-01	486		1		3.948	5.251		TCGA-3A-A9IV-01	1103		0		1.043	2.616		TCGA-3A-A9IC-01	738		1
	0.7832	5.441		TCGA-3A-A9IB-01	224		1		3.95	5.254		TCGA-3A-A9IN-01	2084		0		1.085	2.639		TCGA-FB-AAPS-01	228		0
	0.9716	5.452		TCGA-HZ-8005-01	120		1		3.954	5.283		TCGA-IB-A6UG-01	41		1		1.092	2.646		TCGA-3A-A9IL-01	2741		0
	1.145	5.483		TCGA-RL-AAAS-01	9		0		3.972	5.285		TCGA-FB-A78T-01	375		1		1.138	2.727		TCGA-3A-A9I5-01	1794		0
	1.196	5.514		TCGA-2J-AABI-01	969		0		4.047	5.369		TCGA-HZ-7924-01	840		0		1.151	2.755		TCGA-LB-A8F3-01	379		0
	1.245	5.549		TCGA-HZ-7926-01	518		1		4.051	5.417		TCGA-FB-AAQ2-01	153		1		1.171	2.778		TCGA-IB-A5SS-01	460		1
	1.351	5.58		TCGA-IB-A5ST-01	635		0		4.055	5.478		TCGA-F2-A7TX-01	95		1		1.177	2.799		TCGA-US-A77J-01	568		1
	1.401	5.583		TCGA-F2-7273-01	592		1		4.084	5.539		TCGA-Q3-AA2A-01	95		0		1.183	2.866		TCGA-IB-A6UF-01	666		0
	1.434	5.722		TCGA-IB-7647-01	666		1		4.09	5.593		TCGA-2L-AAQM-01	1383		0		1.202	3.052		TCGA-HZ-A49I-01	308		1
	1.46	5.781		TCGA-IB-A5SQ-01	219		1		4.119	6.465		TCGA-IB-A5SS-01	460	1			1.215	3.662		TCGA-HV-A5A5-01	289		0
	1.491	5.803		TCGA-IB-8127-01	522		0					TCGA-XD-AAUL-01	498	0			1.215			TCGA-IB-7654-01	476	1
	1.541	5.841		TCGA-FB-AAPY-01	1059		1					TCGA-IB-7893-01	117	1						TCGA-HZ-8637-01	517	1
	1.541	6.116		TCGA-HZ-7924-01	840		0					TCGA-2J-AAB8-01	80	0						TCGA-IB-AAUN-01	144	1
	1.561	6.204		TCGA-XN-A8T5-01	720		0					TCGA-IB-A7LX-01	250	1						TCGA-FB-AAQ2-01	153	1
	1.59	6.439		TCGA-H6-8124-01	392		0					TCGA-HZ-A4BH-01	194	0						TCGA-2J-AABF-01	691	1
	1.6	6.5		TCGA-IB-A6UF-01	666		0					TCGA-2J-AAB4-01	729	0						TCGA-S4-A8RO-01	525	0
	1.623	6.676		TCGA-XD-AAUG-01	420		0					TCGA-H6-8124-01	392	0						TCGA-HZ-8005-01	120	1
	1.71	6.957		TCGA-RB-AA9M-01	286		0					TCGA-HZ-A77P-01	330	0						TCGA-IB-A5ST-01	635	0
	1.787	7.542		TCGA-FB-AAQ0-01	473		1					TCGA-HZ-8636-01	545	1						TCGA-HZ-7925-01	614	1
				TCGA-IB-A5SO-01	365	1						TCGA-2J-AABA-01	607	1						TCGA-HZ-7919-01	593	1
				TCGA-FB-AAPU-01	381	1						TCGA-IB-AAUO-01	239	1						TCGA-L1-A7W4-01	278	1
				TCGA-F2-A7TX-01	95	1						TCGA-M8-A5N4-01	584	0						TCGA-IB-7886-01	123	1
				TCGA-HZ-8638-01	151	1						TCGA-YB-A89D-01	350	0						TCGA-F2-6879-01	334	1
				TCGA-HZ-7922-01	4	0						TCGA-FB-A4P6-01	767	0						TCGA-IB-7651-01	603	1
				TCGA-IB-7645-01	1502	1						TCGA-FB-A545-01	732	1						TCGA-US-A774-01	695	1
				TCGA-FB-A545-01	732	1						TCGA-L1-A7W4-01	278	1						TCGA-F2-7276-01	216	1
				TCGA-HZ-8001-01	706	0						TCGA-IB-AAUV-01	404	0						TCGA-F2-7273-01	592	1
				TCGA-HZ-7925-01	614	1						TCGA-2J-AABE-01	676	0						TCGA-HZ-7926-01	518	1
				TCGA-FB-A5VM-01	498	1						TCGA-IB-7885-01	1257	0						TCGA-HZ-A77O-01	160	1
				TCGA-IB-A7M4-01	483	0						TCGA-HZ-A77Q-01	33	0						TCGA-HZ-7922-01	4	0
				TCGA-HZ-A4BH-01	194	0						TCGA-US-A77E-01	430	1						TCGA-HZ-8003-01	596	1
				TCGA-HV-A5A3-01	128	1						TCGA-2J-AABU-01	277	1						TCGA-IB-AAUU-01	245	0
				TCGA-LB-A8F3-01	379	0						TCGA-FB-A7DR-01	353	1						TCGA-IB-7645-01	1502	1
				TCGA-3A-A9IZ-01	308	1						TCGA-XD-AAUG-01	420	0						TCGA-HV-AA8X-01	532	1
				TCGA-HZ-A49H-01	491	0						TCGA-3A-A9IC-01	738	1						TCGA-HZ-8002-01	366	1
				TCGA-F2-A44G-01	233	1						TCGA-YH-A8SY-01	388	0						TCGA-HZ-8317-01	378	1
				TCGA-FB-AAPQ-01	1130	1						TCGA-HV-AA8V-01	920	0						TCGA-2J-AAB8-01	80	0
				TCGA-YB-A89D-01	350	0						TCGA-IB-A6UF-01	666	0						TCGA-2L-AAQI-01	103	1
				TCGA-HV-AA8X-01	532	1						TCGA-FB-AAPS-01	228	0						TCGA-HZ-8638-01	151	1
				TCGA-F2-6879-01	334	1						TCGA-2J-AABT-01	319	0						TCGA-HZ-A8P1-01	7	0
				TCGA-L1-A7W4-01	278	1						TCGA-IB-7890-01	598	1						TCGA-IB-7893-01	117	1
				TCGA-IB-A5SS-01	460	1						TCGA-2J-AABI-01	969	0						TCGA-IB-7644-01	394	1
				TCGA-3E-AAAY-01	2285	0														TCGA-FB-AAPP-01	485	1
				TCGA-US-A77E-01	430	1														TCGA-IB-7647-01	666	1
				TCGA-2J-AABA-01	607	1														TCGA-3A-A9I7-01	1323	0
				TCGA-2L-AAQI-01	103	1														TCGA-HZ-7924-01	840	0
				TCGA-IB-7646-01	145	1
				TCGA-LB-A9Q5-01	313	1
				TCGA-IB-AAUO-01	239	1
				TCGA-HV-A5A4-01	232	0
				TCGA-S4-A8RM-01	737	0
				TCGA-IB-7652-01	1116	0
				TCGA-HZ-7919-01	593	1
				TCGA-IB-7651-01	603	1
				TCGA-3A-A9IU-01	458	1
				TCGA-2J-AAB6-01	293	1
				TCGA-IB-7887-01	110	1
				TCGA-IB-7885-01	1257	0
				TCGA-F2-A8YN-01	517	0
				TCGA-M8-A5N4-01	584	0
				TCGA-HV-AA8V-01	920	0
				TCGA-2L-AAQJ-01	394	1
				TCGA-HZ-A77Q-01	33	0
				TCGA-3A-A9IH-01	1021	0
